# Supplementary material for: Semi-overexpressed OsMYB86L2 specifically enhances cellulose biosynthesis to maximize bioethanol productivity by cascading lignocellulose depolymerization via integrated rapid-physical and recyclable-chemical processes
Source: Royal Society of Chemistry journal article supplement (doi:10.1039/d5gc00658a), 2025-01-01
Supplement: d5gc00658a1.xlsx [file d5gc00658a1.xlsx]

## Sheet: All compounds information
Table S7. Information on all compounds detected by LCMS
ID	Name	Formula	Retention time(min)	m/z	Mode	Adducts	Pubchem_ID	InChiKeys	SMILES	Fragmentation Score	classA	classB	classC	Oxalic acid Pretreatment supernatant	Oxalic acid Enzymatic supernatant	CaO Pretreatment supernatant	CaO Enzymatic supernatant
5.74_223.0615m/z	Sinapinic acid	C11H12O5	5.73577	223.062	neg	M-H	637775	PCMORTLOPMLEFB-ONEGZZNKSA-N	COC1=CC(=CC(=C1O)OC)/C=C/C(=O)O	97.8	Phenylpropanoids and polyketides	Cinnamic acids and derivatives	Hydroxycinnamic acids and derivatives	17347.2	18169.5	2.32795e+06	21824.2
4.69_353.0888m/z	3-O-Caffeoylquinic acid	C16H18O9	4.69198	353.089	neg	M-H	1794427	CWVRJTMFETXNAD-JUHZACGLSA-N	C1[C@H]([C@H]([C@@H](C[C@@]1(C(=O)O)O)OC(=O)/C=C/C2=CC(=C(C=C2)O)O)O)O	97.6	Organic oxygen compounds	Organooxygen compounds	Alcohols and polyols	119425	2610.16	6199.08	296.737
6.26_516.1274n	3,4-Dicaffeoylquinic acid	C25H24O12	6.25962	515.12	neg	M-H, M+Cl, M-2H	5281780	UFCLZKMFXSILNL-PSEXTPKNSA-N	C1[C@H]([C@H]([C@@H](C[C@@]1(C(=O)O)O)OC(=O)/C=C/C2=CC(=C(C=C2)O)O)OC(=O)/C=C/C3=CC(=C(C=C3)O)O)O	97.6	Organic oxygen compounds	Organooxygen compounds	Alcohols and polyols	1.33654e+06	61639.6	15488.4	8225.37
8.25_538.0900n	Amentoflavone	C30H18O10	8.24728	537.083	neg	M-2H, M-H	5281600	YUSWMAULDXZHPY-UHFFFAOYSA-N	C1=CC(=CC=C1C2=CC(=O)C3=C(O2)C(=C(C=C3O)O)C4=C(C=CC(=C4)C5=CC(=O)C6=C(C=C(C=C6O5)O)O)O)O	97.4	Phenylpropanoids and polyketides	Flavonoids	Biflavonoids and polyflavonoids	2.76199e+06	1.5173e+06	3.23817e+06	1.24768e+06
4.83_353.0888m/z	Cryptochlorogenic acid	C16H18O9	4.82968	353.089	neg	M-H	9798666	GYFFKZTYYAFCTR-AVXJPILUSA-N	C1[C@H](C([C@@H](CC1(C(=O)O)O)O)OC(=O)/C=C/C2=CC(=C(C=C2)O)O)O	97.3	Organic oxygen compounds	Organooxygen compounds	Alcohols and polyols	64948.6	1390.3	5898.62	368.179
0.76_147.0536n	L-glutamic acid	C5H9NO4	0.757683	146.046	neg	M-H, M+FA-H	33032	WHUUTDBJXJRKMK-VKHMYHEASA-N	C(CC(=O)O)[C@@H](C(=O)O)N	97.2	Organic acids and derivatives	Carboxylic acids and derivatives	Amino acids, peptides, and analogues	92097.9	3238.93	6320.32	936.554
6.32_395.0553m/z	rosmarinic acid	C18H16O8	6.32287	395.055	neg	M+Cl	5281792	DOUMFZQKYFQNTF-WUTVXBCWSA-N	C1=CC(=C(C=C1C[C@H](C(=O)O)OC(=O)/C=C/C2=CC(=C(C=C2)O)O)O)O	95.5	Phenylpropanoids and polyketides	Cinnamic acids and derivatives	Hydroxycinnamic acids and derivatives	222412	11712.4	3325.77	1660.83
4.96_577.1383m/z	Procyanidin B2	C30H26O12	4.95508	577.138	neg	M-H	122738	XFZJEEAOWLFHDH-NFJBMHMQSA-N	C1[C@H]([C@H](OC2=C1C(=CC(=C2[C@@H]3[C@H]([C@H](OC4=CC(=CC(=C34)O)O)C5=CC(=C(C=C5)O)O)O)O)O)C6=CC(=C(C=C6)O)O)O	95.5	Phenylpropanoids and polyketides	Flavonoids	Biflavonoids and polyflavonoids	68773.2	2824.44	101954	9325.78
5.17_290.0793n	(-)-Epicatechin	C15H14O6	5.17017	289.072	neg	M-H, M+Cl	72276	PFTAWBLQPZVEMU-UKRRQHHQSA-N	C1[C@H]([C@H](OC2=CC(=CC(=C21)O)O)C3=CC(=C(C=C3)O)O)O	95.3	Phenylpropanoids and polyketides	Flavonoids	Flavans	11183.8	7324.5	164048	10537.7
6.69_329.0674m/z	Jaceosidin	C17H14O7	6.68702	329.067	neg	M-H	5379096	GLAAQZFBFGEBPS-UHFFFAOYSA-N	COC1=C(C=CC(=C1)C2=CC(=O)C3=C(O2)C=C(C(=C3O)OC)O)O	94.1	Phenylpropanoids and polyketides	Flavonoids	O-methylated flavonoids	72864.1	16157	450.266	5765.8
4.98_290.0793n	(+)-catechin		4.98032	289.072	neg	M-H, M+Cl	9064	PFTAWBLQPZVEMU-DZGCQCFKSA-N	C1[C@@H]([C@H](OC2=CC(=CC(=C21)O)O)C3=CC(=C(C=C3)O)O)O	93.9	Phenylpropanoids and polyketides	Flavonoids	Flavans	10750.3	4249.28	279407	6011.83
7.28_315.0515m/z	Isorhamnetin	C16H12O7	7.276	315.051	neg	M-H	5281654	IZQSVPBOUDKVDZ-UHFFFAOYSA-N	COC1=C(C=CC(=C1)C2=C(C(=O)C3=C(C=C(C=C3O2)O)O)O)O	93.2	Phenylpropanoids and polyketides	Flavonoids	Flavones	572204	67786.1	9854.7	18614.4
4.97_421.0785m/z	Isomangiferin	C19H18O11	4.9672	421.079	neg	M-H	5318597	CDYBOKJASDEORM-HBVDJMOISA-N	C1=C2C(=CC(=C1O)O)OC3=C(C2=O)C(=CC(=C3[C@H]4[C@@H]([C@H]([C@@H]([C@H](O4)CO)O)O)O)O)O	93.2	Organoheterocyclic compounds	Benzopyrans	1-benzopyrans	449465	22927	17128.7	13045.5
8.98_343.0834m/z	Eupatilin	C18H16O7	8.97867	343.083	neg	M-H	5273755	DRRWBCNQOKKKOL-UHFFFAOYSA-N	COC1=C(C=C(C=C1)C2=CC(=O)C3=C(O2)C=C(C(=C3O)OC)O)OC	92.9	Phenylpropanoids and polyketides	Flavonoids	O-methylated flavonoids	17407.8	7851.16	35376.8	7157.86
6.70_177.0562m/z	Coniferaldehyde	C10H10O3	6.6984	177.056	neg	M-H	5280536	DKZBBWMURDFHNE-NSCUHMNNSA-N	COC1=C(C=CC(=C1)/C=C/C=O)O	92.6	Benzenoids	Phenols	Methoxyphenols	110767	38077.3	28756.5	55285.3
4.57_484.0862n	1,2'-Di-O-galloylhamamelofuranose	C20H20O14	4.56612	483.079	neg	M-H, M+Cl				92.1				182545	7698.52	7973.23	517.884
7.93_330.0747n	Iristectorigenin B	C17H14O7	7.93295	329.067	neg	M+Cl, 2M-H, M-H	5488781	WRZOUWHPDDOJNR-UHFFFAOYSA-N	COC1=C(C=C(C=C1)C2=COC3=C(C2=O)C(=C(C(=C3)O)OC)O)O	91.9	Phenylpropanoids and polyketides	Isoflavonoids	O-methylated isoflavonoids	1.02456e+07	1.42863e+06	625702	1.68491e+06
8.50_359.0782m/z	Irigenin	C18H16O8	8.4997	359.078	neg	M-H	5464170	TUGWPJJTQNLKCL-UHFFFAOYSA-N	COC1=CC(=CC(=C1OC)O)C2=COC3=C(C2=O)C(=C(C(=C3)O)OC)O	91.9	Phenylpropanoids and polyketides	Isoflavonoids	O-methylated isoflavonoids	42666.3	8299.1	7850.9	5206.97
0.76_132.0305m/z	L-aspartic acid	C4H7NO4	0.757683	132.031	neg	M-H	5960	CKLJMWTZIZZHCS-REOHCLBHSA-N	C([C@@H](C(=O)O)N)C(=O)O	90.4	Organic acids and derivatives	Carboxylic acids and derivatives	Amino acids, peptides, and analogues	166591	1506.07	14797.2	1796.41
8.22_307.1921m/z	Albocycline	C18H28O4	8.2233	307.192	neg	M-H	6440973	BYWWNDLILWPPJP-REXWONOSSA-N	C[C@H]1CC/C=C(/[C@H](/C=C/[C@@](/C=C/C(=O)O[C@@H]1C)(C)O)OC)\C	90	Phenylpropanoids and polyketides	Macrolides and analogues		0	548.416	82935.6	5555.65
10.96_312.2305n	9-Hydroxy-10,12-octadecadienoic acid	C18H32O4	10.9622	311.223	neg	M-H, M+Cl	5282945	NPDSHTNEKLQQIJ-SIGMCMEVSA-N	CCCCC/C=C/C=C/C(CCCCCCCC(=O)O)O	89.7	Lipids and lipid-like molecules	Fatty Acyls	Lineolic acids and derivatives	104312	36091.2	35737.5	3999.49
9.63_337.1088m/z	Demethoxycurcumin	C20H18O5	9.63008	337.109	neg	M-H	5469424	HJTVQHVGMGKONQ-LUZURFALSA-N	COC1=C(C=CC(=C1)/C=C/C(=O)CC(=O)/C=C/C2=CC=C(C=C2)O)O	89.6	Phenylpropanoids and polyketides	Diarylheptanoids	Linear diarylheptanoids	40244.1	12659.9	56874	16736.2
0.82_395.1208m/z	beta-D-Xylopyranosyl-(1->5)-alpha-L-arabinofuranosyl-(1->5)-L-arabinose	C15H26O13	0.818233	395.121	neg	M-H2O-H	131752479	ILEPOIYJHJQWCK-UHFFFAOYSA-N	C1C(C(C(C(O1)OCC2C(C(C(O2)OCC3C(C(C(O3)O)O)O)O)O)O)O)O	89.5	Organic oxygen compounds	Organooxygen compounds	Carbohydrates and carbohydrate conjugates	0	4504.7	0	101262
5.01_432.1645n	6-Ethoxygeniposide	C19H28O11	5.00532	431.157	neg	M-H, M+Cl	102262674	WGNXATPUZSSFNF-HOZAMIDDSA-N	CCO[C@H]1C=C([C@@H]2[C@H]1C(=CO[C@H]2O[C@H]3[C@@H]([C@H]([C@@H]([C@H](O3)CO)O)O)O)C(=O)OC)CO	89.4	Lipids and lipid-like molecules	Prenol lipids	Terpene glycosides	1587.75	0	42341.3	0
0.73_369.0686m/z	4-O-alpha-D-Galactopyranuronosyl-D-galacturonic acid	C12H18O13	0.7319	369.069	neg	M-H				89.1				1063.74	0	0	299174
6.05_181.0511m/z	Syringaldehyde	C9H10O4	6.0473	181.051	neg	M-H	8655	KCDXJAYRVLXPFO-UHFFFAOYSA-N	COC1=CC(=CC(=C1O)OC)C=O	89.1	Benzenoids	Phenols	Methoxyphenols	46673.3	75403.3	17005.4	190361
7.30_299.0203m/z	Demethylwedelolactone	C15H8O7	7.30183	299.02	neg	M-H	5489605	LUTYTNLPIUCKBJ-UHFFFAOYSA-N	C1=C(C=C2C(=C1O)C3=C(C4=CC(=C(C=C4O3)O)O)C(=O)O2)O	89.1	Phenylpropanoids and polyketides	Isoflavonoids	Coumestans	1.00794e+06	175194	222586	176124
9.55_293.1761m/z	6-Gingerol	C17H26O4	9.5546	293.176	neg	M-H	442793	NLDDIKRKFXEWBK-AWEZNQCLSA-N	CCCCC[C@@H](CC(=O)CCC1=CC(=C(C=C1)O)OC)O	89	Benzenoids	Phenols	Methoxyphenols	227074	490586	779593	323857
9.42_283.0609m/z	acacetin	C16H12O5	9.41708	283.061	neg	M-H	5280442	DANYIYRPLHHOCZ-UHFFFAOYSA-N	COC1=CC=C(C=C1)C2=CC(=O)C3=C(C=C(C=C3O2)O)O	88.2	Phenylpropanoids and polyketides	Flavonoids	O-methylated flavonoids	28683.8	15409.8	26772.8	20016
5.92_151.0410m/z	Vanillin	C8H8O3	5.92145	151.041	neg	M-H	1183	MWOOGOJBHIARFG-UHFFFAOYSA-N	COC1=C(C=CC(=C1)C=O)O	88.1	Benzenoids	Phenols	Methoxyphenols	99373.6	227056	55339.2	381372
13.68_507.3256m/z	Corosolic acid	C30H48O4	13.6802	507.326	neg	M+Cl	6918774	HFGSQOYIOKBQOW-ZSDYHTTISA-N	C[C@@H]1CC[C@@]2(CC[C@@]3(C(=CC[C@H]4[C@]3(CC[C@@H]5[C@@]4(C[C@H]([C@@H](C5(C)C)O)O)C)C)[C@@H]2[C@H]1C)C)C(=O)O	88	Lipids and lipid-like molecules	Prenol lipids	Triterpenoids	202878	179292	108836	109956
6.02_261.1345m/z	9-(2,3-Dihydroxypropoxy)-9-oxononanoic acid	C12H22O6	6.02125	261.134	neg	M-H	45783154	BQRISQXLSXCXSC-UHFFFAOYSA-N	C(CCCC(=O)O)CCCC(=O)OCC(CO)O	87.9	Lipids and lipid-like molecules	Fatty Acyls	Fatty acids and conjugates	2225.34	69830.7	5667.44	17126.8
7.14_297.0775m/z	2'-Methoxyformonetin	C17H14O5	7.13933	297.078	neg	M-H	5781145	SSRCYGATNWFTBJ-UHFFFAOYSA-N	COC1=CC(=C(C=C1)C2=COC3=C(C2=O)C=CC(=C3)O)OC	87.8	Phenylpropanoids and polyketides	Isoflavonoids	O-methylated isoflavonoids	25182.5	3512.52	0	0
5.77_474.0809n	Cichoric acid	C22H18O12	5.7728	473.074	neg	M-2H, M-H	5281764	YDDGKXBLOXEEMN-IABMMNSOSA-N	C1=CC(=C(C=C1/C=C/C(=O)O[C@@H](C(=O)O)[C@@H](OC(=O)/C=C/C2=CC(=C(C=C2)O)O)C(=O)O)O)O	87.7	Organic acids and derivatives	Carboxylic acids and derivatives	Tetracarboxylic acids and derivatives	239435	172.3	2529.01	0
5.68_431.0998m/z	2-(3,4-dihydroxyphenyl)-7-{[3,4,5-trihydroxy-6-(hydroxymethyl)oxan-2-yl]oxy}-4H-chromen-4-one	C21H20O10	5.68417	431.1	neg	M-H				87.3				171306	9717.36	2272.08	7735.93
5.90_447.0942m/z	Astragalin	C21H20O11	5.89693	447.094	neg	M-H	5282102	JPUKWEQWGBDDQB-QSOFNFLRSA-N	C1=CC(=CC=C1C2=C(C(=O)C3=C(C=C(C=C3O2)O)O)O[C@H]4[C@@H]([C@H]([C@@H]([C@H](O4)CO)O)O)O)O	87.2	Phenylpropanoids and polyketides	Flavonoids	Flavonoid glycosides	0	0	35238.7	0
5.30_573.0913m/z	Mangiferin 6'-gallate	C26H22O15	5.29675	573.091	neg	M-H				87				259386	8289.36	0	0
5.42_593.1533m/z	Emodin-8-O-beta-gentiobioside	C27H30O15	5.42245	593.153	neg	M-H	71587230	CAWCIUJVWYETGQ-ONMHTNRHSA-N	CC1=CC2=C(C(=C1)O)C(=O)C3=C(C2=O)C=C(C=C3O[C@H]4[C@@H]([C@H]([C@@H]([C@H](O4)CO[C@H]5[C@@H]([C@H]([C@@H]([C@H](O5)CO)O)O)O)O)O)O)O	86.6	Benzenoids	Anthracenes	Anthraquinones	70532.4	983.81	4391.38	41971.4
1.16_243.0625m/z	Uridine	C9H12N2O6	1.16003	243.063	neg	M-H	6029	DRTQHJPVMGBUCF-XVFCMESISA-N	C1=CN(C(=O)NC1=O)[C@H]2[C@@H]([C@@H]([C@H](O2)CO)O)O	86.5	Nucleosides, nucleotides, and analogues	Pyrimidine nucleosides		0	20036.5	13326.9	40488.3
6.27_492.1273n	Aurantio-obtusin Beta-D-glucoside	C23H24O12	6.27385	491.12	neg	M-H, M+Cl	442725	LQYQYAJWKXDTHR-PHVGODQESA-N	CC1=CC2=C(C(=C1O)OC)C(=O)C3=C(C(=C(C=C3C2=O)O[C@H]4[C@@H]([C@H]([C@@H]([C@H](O4)CO)O)O)O)OC)O	86.4	Benzenoids	Anthracenes	Anthraquinones	231701	353.834	76191.6	0
4.98_634.0861n	Corilagin	C27H22O18	4.98032	633.079	neg	M-H, M+Cl	73568	TUSDEZXZIZRFGC-XIGLUPEJSA-N	C1[C@@H]2[C@H]([C@@H]([C@H]([C@@H](O2)OC(=O)C3=CC(=C(C(=C3)O)O)O)O)OC(=O)C4=CC(=C(C(=C4C5=C(C(=C(C=C5C(=O)O1)O)O)O)O)O)O)O	86.3	Phenylpropanoids and polyketides	Tannins	Hydrolyzable tannins	695128	53273.7	50192.2	28247.3
10.21_552.1052n	Ochnaflavone 4'-methyl ether	C31H20O10	10.208	551.098	neg	M-2H, M-H				86.3				495154	351722	670425	374494
3.22_125.0247m/z	1,2,3-Trihydroxybenzene	C6H6O3	3.21858	125.025	neg	M-H	1057	WQGWDDDVZFFDIG-UHFFFAOYSA-N	C1=CC(=C(C(=C1)O)O)O	86.1	Benzenoids	Phenols	Benzenetriols and derivatives	1.40569e+06	193384	159415	288545
4.20_344.1118n	Domesticoside	C15H20O9	4.20012	379.081	neg	M-H, M+Cl				85.5				72644.9	1868.24	794.726	0
1.15_192.0275n	Citrate	C6H8O7	1.14833	191.02	neg	M-H2O-H, M-H	31348	KRKNYBCHXYNGOX-UHFFFAOYSA-K	C(C(=O)[O-])C(CC(=O)[O-])(C(=O)[O-])O	85.3	Organic acids and derivatives	Carboxylic acids and derivatives	Tricarboxylic acids and derivatives	4.14534e+06	148578	2792.48	66145
5.80_267.0875m/z	Homoarbutin	C13H18O7	5.79673	267.087	neg	M-H2O-H	324796	SUSHDSMGFVANCQ-UHFFFAOYSA-N	CC1=C(C=CC(=C1)OC2C(C(C(C(O2)CO)O)O)O)O	85.2	Organic oxygen compounds	Organooxygen compounds	Carbohydrates and carbohydrate conjugates	21351.5	10043.4	14887.5	130628
0.77_280.0802n	3,4,5-trihydroxy-6-[(4-hydroxybutanoyl)oxy]oxane-2-carboxylic acid	C10H16O9	0.767217	325.078	neg	M-H2O-H, M+FA-H				85.2				211778	58173.9	0	54601
6.03_373.1305m/z	Marmesin rhamnoside	C20H24O8	6.0349	373.13	neg	M-H2O-H	131752678	HOSJGHRJSDQCPE-UHFFFAOYSA-N	CC1C(C(C(C(O1)OC(C)(C)C2CC3=C(O2)C=C4C(=C3)C=CC(=O)O4)O)O)O	84.7	Phenylpropanoids and polyketides	Coumarins and derivatives	Furanocoumarins	42187.6	2651.97	0	656.098
6.40_389.1251m/z	3-(3,4-dimethoxyphenyl)-5-hydroxy-7-methoxy-8-methyl-3,4-dihydro-2H-1-benzopyran-4-one	C19H20O6	6.39958	389.125	neg	M+FA-H				84.3				247828	28603.8	1673.19	4793.45
4.88_311.0778m/z	6-(4-ethenyl-3-hydroxyphenoxy)-3,4,5-trihydroxyoxane-2-carboxylic acid	C14H16O8	4.88005	311.078	neg	M-H	131832860	SUAFKEIYLAQXIP-UHFFFAOYSA-N	CCC1=C(C=C(C=C1)OC2C(C(C(C(O2)C(=O)O)O)O)O)O	84	Organic oxygen compounds	Organooxygen compounds	Carbohydrates and carbohydrate conjugates	111738	9716.43	6181.89	0
5.50_371.0996m/z	3-(Benzoyloxy)-2-hydroxypropyl -D-glucopyranosiduronic acid	C16H20O10	5.49875	371.1	neg	M-H				83.9				521970	1944.42	398.364	600.768
9.47_307.0981m/z	1,4,6-Heptatrien-3-one, 5-hydroxy-1,7-bis(4-hydroxyphenyl)-	C19H16O4	9.46865	307.098	neg	M-H	468139	YXAKCQIIROBKOP-UHFFFAOYSA-N	C1=CC(=CC=C1C=CC(=CC(=O)C=CC2=CC=C(C=C2)O)O)O	83.2	Phenylpropanoids and polyketides	Diarylheptanoids	Linear diarylheptanoids	52428.9	15789.7	69142.6	22264.9
1.15_180.0670m/z	L-Tyrosine	C9H11NO3	1.14833	180.067	neg	M-H	6057	OUYCCCASQSFEME-QMMMGPOBSA-N	C1=CC(=CC=C1C[C@@H](C(=O)O)N)O	82.9	Organic acids and derivatives	Carboxylic acids and derivatives	Amino acids, peptides, and analogues	418.164	40562.5	2245.57	57104.5
4.60_360.1066n	Erigeside C	C15H20O10	4.60393	359.099	neg	M-H, M+Cl	14132346	CIYLTHWUJCCASO-APACUCGBSA-N	COC1=CC(=CC(=C1O)OC)C(=O)O[C@H]2[C@@H]([C@H]([C@@H]([C@H](O2)CO)O)O)O	82.6	Phenylpropanoids and polyketides	Tannins	Hydrolyzable tannins	50919.6	604.567	0	0
1.05_321.0502m/z	5-Thymidylic acid	C10H15N2O8P	1.05492	321.05	neg	M-H				82.4				733.982	0	0	18384.5
5.34_385.0787m/z	6-{2-[(1E)-2-carboxyeth-1-en-1-yl]phenoxy}-3,4,5-trihydroxyoxane-2-carboxylic acid	C15H16O9	5.33627	385.079	neg	M+FA-H	131831532	XPCHMFOWDFTFNV-SNAWJCMRSA-N	C1=CC(=CC(=C1)OC2C(C(C(C(O2)C(=O)O)O)O)O)/C=C/C(=O)O	82.3	Organic oxygen compounds	Organooxygen compounds	Carbohydrates and carbohydrate conjugates	27531.9	0	0	0
8.36_359.0781m/z	Jaceidin	C18H16O8	8.36005	359.078	neg	M-H	5464461	XUWTZJRCCPNNJR-UHFFFAOYSA-N	COC1=C(C=CC(=C1)C2=C(C(=O)C3=C(O2)C=C(C(=C3O)OC)O)OC)O	81.8	Phenylpropanoids and polyketides	Flavonoids	O-methylated flavonoids	79898.2	13213.1	14125.9	8083.05
6.74_445.0787m/z	6-[(5,7-dihydroxy-4-oxo-2-phenyl-4H-chromen-3-yl)oxy]-3,4,5-trihydroxyoxane-2-carboxylic acid	C21H18O11	6.73732	445.079	neg	M-H				81.7				490604	52982.2	94841.7	43119.7
10.17_355.2497m/z	Prostaglandin F1a	C20H36O5	10.17	355.25	neg	M-H	4957	DZUXGQBLFALXCR-UHFFFAOYSA-N	CCCCCC(C=CC1C(CC(C1CCCCCCC(=O)O)O)O)O	81.7	Lipids and lipid-like molecules	Fatty Acyls	Eicosanoids	495.427	0	39824.9	1934.38
8.44_341.1040m/z	Przewaquinone C	C18H16O4	8.4368	341.104	neg	M+FA-H	126071	JVRKHBLVECIWMZ-UHFFFAOYSA-N	CC1=COC2=C1C(=O)C(=O)C3=C2C=CC4=C3CCCC4(C)O	81.6	Lipids and lipid-like molecules	Prenol lipids	Diterpenoids	0	0	0	29768.3
6.71_373.1304m/z	Diffractaic Acid	C20H22O7	6.71072	373.13	neg	M-H	94870	MIJKZXWOOXIEEU-UHFFFAOYSA-N	CC1=CC(=C(C(=C1C(=O)O)O)C)OC(=O)C2=C(C(=C(C=C2C)OC)C)OC	81.6	Phenylpropanoids and polyketides	Depsides and depsidones		7054.59	254.989	29695.1	0
11.45_377.2318m/z	Vitexilactone	C22H34O5	11.4531	377.232	neg	M-H	21636178	FBWWXAGANVJTLU-HEXLTJKYSA-N	C[C@@H]1C[C@H]([C@@H]2[C@@]([C@]1(CCC3=CC(=O)OC3)O)(CCCC2(C)C)C)OC(=O)C	81.4	Lipids and lipid-like molecules	Prenol lipids	Terpene lactones	138.719	1318.15	58231.6	3848.62
6.08_420.1793n	Castaneiolide	C22H28O8	6.08487	419.172	neg	M-H, M+K-2H				81.2				52557.3	657.435	534.885	0
4.89_547.1667m/z	Stachyoside A	C21H34O15	4.8917	547.167	neg	M+Na-2H	14704876	FQUORBSJLORVQE-UHFFFAOYSA-N	CC1(CC(C2(C1C(OC=C2)OC3C(C(C(C(O3)COC4C(C(C(C(O4)CO)O)O)O)O)O)O)O)O)O	81.2	Lipids and lipid-like molecules	Prenol lipids	Terpene glycosides	67513.8	10849.2	0	22247.2
4.82_340.1564m/z	Phellodendrine chloride		4.81707	340.156	neg	M+?				81				1337	0	19967.4	0
5.66_178.0271n	Esculetin	C9H6O4	5.65953	177.02	neg	M-H, M+Cl	5281416	ILEDWLMCKZNDJK-UHFFFAOYSA-N	C1=CC(=O)OC2=CC(=C(C=C21)O)O	79.8	Phenylpropanoids and polyketides	Coumarins and derivatives	Hydroxycoumarins	12240.9	11198.7	1.09273e+06	19007.9
1.20_163.0616m/z	L-Rhamnose	C6H12O5	1.1978	163.062	neg	M-H	25310	SHZGCJCMOBCMKK-JFNONXLTSA-N	C[C@H]1[C@@H]([C@H]([C@H](C(O1)O)O)O)O	79.6	Organic oxygen compounds	Organooxygen compounds	Carbohydrates and carbohydrate conjugates	236516	8465.11	5294.54	12023.1
4.05_881.2898m/z	Indican	C14H16NO6	4.04745	881.29	neg	3M-H	441564	XVARCVCWNFACQC-RKQHYHRCSA-N	C1=CC=C2C(=C1)C(=CN2)O[C@H]3[C@@H]([C@H]([C@@H]([C@H](O3)CO)O)O)O	79.6	Organic oxygen compounds	Organooxygen compounds	Carbohydrates and carbohydrate conjugates	0	83675.6	0	0
7.94_313.0358m/z	7-hydroxy-6-methoxy-3-(1,2,5-trihydroxy-4-oxocyclohexa-2,5-dien-1-yl)-4H-chromen-4-one	C16H12O8	7.9443	313.036	neg	M-H2O-H				79.5				112583	13591.3	3881.32	18260.1
6.32_357.0625m/z	(E)-Antibiotic BE 23372M	C17H12O6	6.32287	357.062	neg	M+FA-H	131753025	NKCVEROYQKLTRJ-JYOAFUTRSA-N	C1=CC(=C(C=C1C2=C/C(=C/C3=CC(=CC(=C3)O)O)/C(=O)O2)O)O	79.4	Benzenoids	Phenols	Benzenediols	87974.9	15319.3	11475.9	8197.16
12.10_347.1875m/z	2-Hexyl-5-[2-(4-hydroxy-3-methoxyphenyl)ethyl]furan	C19H26O3	12.0961	347.187	neg	M+FA-H	15929154	WZHSIDQBPQYZNL-UHFFFAOYSA-N	CCCCCCC1=CC=C(O1)CCC2=CC(=C(C=C2)O)OC	79.4	Lipids and lipid-like molecules	Fatty Acyls	Fatty acids and conjugates	14956.8	7874.44	10933.4	9788.27
5.91_387.1457m/z	Calealactone C	C21H26O8	5.90833	387.146	neg	M-H2O-H	9844240	FCYRUIVZYHKCPI-DKBBEFOWSA-N	C/C/1=C/CC(=O)[C@]([C@@H]([C@H]([C@@H]2[C@@H](C1)OC(=O)C2=C)OC(=O)C(=C)C)OC(=O)C)(C)O	79.2	Lipids and lipid-like molecules	Prenol lipids	Terpene lactones	0	297.681	37310.4	2726.23
7.82_373.0941m/z	2-(4-benzoyl-3,5-dihydroxyphenoxy)-6-(hydroxymethyl)oxane-3,4,5-triol	C19H20O9	7.82053	373.094	neg	M-H2O-H				79.2				19261.9	0	614.878	0
5.31_523.1229m/z	Cistanoside F	C21H28O13	5.30907	523.123	neg	M+Cl	101688189	KARNWFDIYRKBOE-BHSPTIPFSA-N	C[C@H]1[C@@H]([C@H]([C@H]([C@@H](O1)O[C@H]([C@H](C=O)O)[C@@H]([C@@H](CO)O)OC(=O)/C=C/C2=CC(=C(C=C2)O)O)O)O)O	79.1	Lipids and lipid-like molecules	Fatty Acyls	Fatty acyl glycosides	394977	85408	73.0317	0
0.80_89.0245m/z	Methoxyacetic acid	C3H6O3	0.797333	89.0245	neg	M-H				79.1				57651.3	306144	155900	510428
10.12_331.1922m/z	Pterisolic acid D	C20H30O5	10.1207	331.192	neg	M-H2O-H				79				7172.02	2137.38	28227.1	6446.08
6.75_367.0837m/z	Tetrangomycin	C19H14O5	6.75052	367.084	neg	M+FA-H	160887	UGEKKXLEYACFTD-UHFFFAOYSA-N	CC1(CC2=C(C(=O)C1)C3=C(C=C2)C(=O)C4=C(C3=O)C=CC=C4O)O	78.7	Phenylpropanoids and polyketides	Angucyclines		29679.6	4361.49	0	2411.21
5.75_385.1151m/z	3,4,5-trihydroxy-6-[1-(3-phenyloxiran-2-yl)ethoxy]oxane-2-carboxylic acid	C16H20O8	5.74807	385.115	neg	M+FA-H	131837575	AWMSVZXKFIZFCN-UHFFFAOYSA-N	CC(C1C(O1)C2=CC=CC=C2)OC3C(C(C(C(O3)C(=O)O)O)O)O	78.4	Organic oxygen compounds	Organooxygen compounds	Carbohydrates and carbohydrate conjugates	20993.9	0	0	0
0.68_243.0490m/z	6-ethoxy-3,4,5-trihydroxyoxane-2-carboxylic acid	C8H14O7	0.6831	243.049	neg	M+Na-2H	21845293	IWJBVMJWSPZNJH-UHFFFAOYSA-N	CCOC1C(C(C(C(O1)C(=O)O)O)O)O	78.4	Organic oxygen compounds	Organooxygen compounds	Carbohydrates and carbohydrate conjugates	0	86458.7	0	0
5.36_369.0840m/z	6-[5-(1-carboxyethyl)-4-hydroxy-2-methoxyphenoxy]-3,4,5-trihydroxyoxane-2-carboxylic acid	C16H20O11	5.35925	369.084	neg	M-H2O-H				78.4				283271	50738.8	0	1172.32
6.00_371.1149m/z	Moracin P	C19H18O5	5.9971	371.115	neg	M+FA-H	25208124	QFUCSEIKNTUPPA-GOSISDBHSA-N	CC1([C@@H](CC2=C(O1)C=C3C(=C2)C=C(O3)C4=CC(=CC(=C4)O)O)O)C	78.4	Phenylpropanoids and polyketides	2-arylbenzofuran flavonoids		11688.2	266.641	39572.3	4494.1
6.80_369.0992m/z	Moracin L	C19H16O5	6.79998	369.099	neg	M+FA-H	118726654	FQHZBTIVEUAARU-UHFFFAOYSA-N	CC1=CCC2=C3C(=CC(=C2OC1)O)C=C(O3)C4=CC(=CC(=C4)O)O	78.2	Phenylpropanoids and polyketides	2-arylbenzofuran flavonoids		3400.71	0	2342.68	179460
1.23_116.0111n	Maleic acid	C4H4O4	1.23338	115.004	neg	M-H, M+Cl	444266	VZCYOOQTPOCHFL-UPHRSURJSA-N	C(=C\C(=O)O)\C(=O)O	77.6	Organic acids and derivatives	Carboxylic acids and derivatives	Dicarboxylic acids and derivatives	266051	16686.2	3312.84	8760.76
8.05_499.1252m/z	10-O-Coumaroyl-10-O-deacetylasperuloside	C25H26O12	8.04638	499.125	neg	M-H2O-H	95224286	JXFDBOBLMXBLDZ-ULUBWVSDSA-N	C1=CC(=CC=C1/C=C/C(=O)OCC2=C[C@H]3[C@H]4[C@@H]2[C@@H](OC=C4C(=O)O3)O[C@H]5[C@@H]([C@H]([C@@H]([C@H](O5)CO)O)O)O)O	77.5	Phenylpropanoids and polyketides	Cinnamic acids and derivatives	Hydroxycinnamic acids and derivatives	44520.5	0	0	0
5.53_207.0667m/z	Massarilactone B	C11H14O5	5.53398	207.067	neg	M-H2O-H	10105097	DXUWKSUWEMSKDA-MHLXCEJISA-N	C/C=C/[C@H]1[C@@H]([C@H](C2=C(O1)[C@@H](OC2=O)C)O)O	77.4	Organoheterocyclic compounds	Dihydrofurans	Furanones	29990.1	4889.26	2934.93	4494.77
4.92_367.1048m/z	3-O-Caffeoyl-4-O-methylquinic acid	C17H20O9	4.9177	367.105	neg	M-H				77.3				101082	3037.56	280.06	0
6.17_213.9642m/z	2-Benzothiazolesulfonic acid	C7H5NO3S2	6.17385	213.964	neg	M-H	30647	ZCXGMSGCBDSEOY-UHFFFAOYSA-N	C1=CC=C2C(=C1)N=C(S2)S(=O)(=O)O	77.2	Organoheterocyclic compounds	Benzothiazoles		3354.17	8485.7	7373.88	26639.8
6.51_420.1069n	6-{4-[(E)-2-(3,5-dihydroxyphenyl)ethenyl]-3-hydroxyphenoxy}-3,4,5-trihydroxyoxane-2-carboxylic acid	C20H20O10	6.5111	401.089	neg	M-H2O-H, M-H				77				8985.92	3316.04	16660.2	81577.4
7.96_365.1982m/z	Oryzalide B	C19H28O4	7.95748	365.198	neg	M+FA-H	131752210	QINXJSIKYUBGSE-UHFFFAOYSA-N	CC1(C2CCC34CC(CCC3C2(C(OC1=O)O)C)C(=C)C4O)C	77	Lipids and lipid-like molecules	Prenol lipids	Terpene lactones	0	139.315	46864.2	72.3866
5.81_302.0068n	ellagic acid	C14H6O8	5.81003	301	neg	M-H, 2M-H	5281855	AFSDNFLWKVMVRB-UHFFFAOYSA-N	C1=C2C3=C(C(=C1O)O)OC(=O)C4=CC(=C(C(=C43)OC2=O)O)O	77	Phenylpropanoids and polyketides	Tannins	Hydrolyzable tannins	3.71359e+06	283458	160087	97806.3
7.88_387.0730m/z	Neolancerin	C19H18O10	7.88317	387.073	neg	M-H2O-H	92029590	KRCBALDMBZQTIQ-ZJKJAXBQSA-N	C1=CC2=C(C=C1O)C(=O)C3=C(O2)C=C(C(=C3O)[C@H]4[C@@H]([C@H]([C@@H]([C@H](O4)CO)O)O)O)O	76.8	Organoheterocyclic compounds	Benzopyrans	1-benzopyrans	0	0	13868.3	35281.4
8.16_443.1360m/z	Salviaplebeiaside	C23H26O10	8.15962	443.136	neg	M-H2O-H	131846037	SGIIZGFEDJBZCG-ZFVIQDPVSA-N	CC(=O)CCC1=CC(=C(C=C1)O[C@H]2[C@@H]([C@H]([C@@H]([C@H](O2)COC(=O)C3=CC=C(C=C3)O)O)O)O)O	76.8	Organic oxygen compounds	Organooxygen compounds	Carbohydrates and carbohydrate conjugates	41666	3594	0	3452.24
6.32_449.1461m/z	Pinostilbenoside	C21H24O8	6.32287	449.146	neg	M+FA-H	23271974	IIISUZGWBIPYEJ-DXKBKAGUSA-N	COC1=CC(=CC(=C1)O)/C=C/C2=CC=C(C=C2)O[C@H]3[C@@H]([C@H]([C@@H]([C@H](O3)CO)O)O)O	76.6	Phenylpropanoids and polyketides	Stilbenes	Stilbene glycosides	0	0	30827.7	1166.29
7.25_433.1155m/z	Gibepyrone D	C10H10O4	7.252	433.116	neg	2M+FA-H	20056005	MQNNRPUVAMHCCO-FNORWQNLSA-N	CC1=CC=C(OC1=O)/C(=C/C(=O)O)/C	76.5	Organoheterocyclic compounds	Pyrans	Pyranones and derivatives	31471.3	0	666.576	0
0.85_471.1366m/z	4-O-Methyl-a-D-glucosyl-(1->2)-b-D-xylosyl-(1->4)-D-xylose	C17H28O15	0.846783	471.137	neg	M-H				76.5				49039.3	35734.5	0	1.39259e+06
7.54_337.1089m/z	Fibleucin	C20H20O6	7.54265	337.109	neg	M-H2O-H	21626385	KVIOMDMYQSLLQA-BHXOAUIUSA-N	C[C@@]12CC=C3C(=O)OC(C[C@]3([C@@H]1[C@H]4C=C[C@@]2(C(=O)O4)O)C)C5=COC=C5	76.4	Organoheterocyclic compounds	Naphthopyrans		6379.76	858.089	0	12490.6
6.70_293.1397m/z	7alpha-Hydroxy-4,11-cadinadiene-3,8-dione	C15H20O3	6.6984	293.14	neg	M+FA-H	60156133	GMEQWOXALWTOIS-CKRXIKOQSA-N	C[C@@H]1CC(=O)[C@]([C@@H]2[C@H]1CC(=O)C(=C2)C)(C(=C)C)O	76.3	Lipids and lipid-like molecules	Prenol lipids	Sesquiterpenoids	13575.9	0	46753.6	0
7.96_357.0988m/z	1-[2-(2H-1,3-benzodioxol-5-yl)-1-benzofuran-5-yl]propane-1,3-diol	C18H16O5	7.95748	357.099	neg	M+FA-H	131836626	SYSZLYFEISZAME-UHFFFAOYSA-N	C1OC2=C(O1)C=C(C=C2)C3=CC4=C(O3)C=CC(=C4)C(CCO)O	76.2	Phenylpropanoids and polyketides	2-arylbenzofuran flavonoids		9658.57	0	206859	94728.9
7.88_165.9795m/z	2-Mercaptobenzothiazole	C7H5NS2	7.88317	165.979	neg	M-H	697993	YXIWHUQXZSMYRE-UHFFFAOYSA-N	C1=CC=C2C(=C1)NC(=S)S2	76	Organoheterocyclic compounds	Benzothiazoles		2.80008e+06	1.00357e+06	394026	1.11629e+06
7.05_653.3437m/z	Kuguaglycoside C	C36H56O8	7.05028	653.344	neg	M+K-2H	101447827	OMBHCPPEZFBPJG-ZBAJYRRDSA-N	C[C@H](C/C=C/C(=C)C)[C@H]1CC[C@@]2([C@@]1(CC[C@@]3([C@H]2[C@H](C=C4[C@H]3CC[C@@H](C4(C)C)O)O[C@H]5[C@@H]([C@H]([C@@H]([C@H](O5)CO)O)O)O)C=O)C)C	76	Lipids and lipid-like molecules	Steroids and steroid derivatives	Cucurbitacins	0	7919.94	36658.6	251307
8.49_539.0987m/z	Dihydromorelloflavone	C30H22O11	8.48758	539.099	neg	M-H2O-H	11467081	IMIXFUXOSFSXPC-UHFFFAOYSA-N	C1C(OC2=C(C(=CC(=C2C1=O)O)O)C3C(OC4=CC(=CC(=C4C3=O)O)O)C5=CC=C(C=C5)O)C6=CC(=C(C=C6)O)O	76	Phenylpropanoids and polyketides	Flavonoids	Biflavonoids and polyflavonoids	95225.7	37985	69443.5	28207.7
5.66_297.1137m/z	6-Benzoyl-5,7-dihydroxy-2,2-dimethylchromane	C18H18O4	5.65953	297.114	neg	M-H	13075266	IZKXPLQWLQOBPG-UHFFFAOYSA-N	CC1(CCC2=C(O1)C=C(C(=C2O)C(=O)C3=CC=CC=C3)O)C	76	Benzenoids	Benzene and substituted derivatives	Benzophenones	0	0	58264.7	0
7.26_371.1150m/z	Dihydroxyalnusone	C19H18O5	7.26337	371.115	neg	M+FA-H	101226713	OJIUVQVUWGUCHF-UTCJRWHESA-N	C1C(/C=C\C(=O)C(CC2=CC(=C(C=C2)O)C3=C(C=CC1=C3)O)O)O	75.8	Phenylpropanoids and polyketides	Diarylheptanoids	Cyclic diarylheptanoids	35446.6	4653.85	1408.75	6588.92
8.44_301.0723m/z	hesperetin	C16H14O6	8.4368	301.072	neg	M-H	72281	AIONOLUJZLIMTK-AWEZNQCLSA-N	COC1=C(C=C(C=C1)[C@@H]2CC(=O)C3=C(C=C(C=C3O2)O)O)O	75.8	Phenylpropanoids and polyketides	Flavonoids	O-methylated flavonoids	36852.2	4508.94	0	0
5.36_389.1250m/z	Marmesin galactoside	C20H24O9	5.35925	389.125	neg	M-H2O-H				75.7				36366.7	593.97	155479	561.235
10.41_333.2078m/z	(ent-16betaOH)-16,17-Dihydroxy-9(11)-kauren-19-oic acid	C20H30O4	10.41	333.208	neg	M-H				75.7				958.183	739.562	12938.3	2130.97
5.13_445.2090m/z	Linalool 3,7-oxide beta-primeveroside	C21H36O11	5.13213	445.209	neg	M-H2O-H	131752012	UXVKRHYINVOVAM-UHFFFAOYSA-N	CC1(C(CCC(O1)(C)C=C)OC2C(C(C(C(O2)COC3C(C(C(CO3)O)O)O)O)O)O)C	75.7	Organic oxygen compounds	Organooxygen compounds	Carbohydrates and carbohydrate conjugates	0	0	62003.5	0
4.63_330.0959n	2-Hydroxy-3-methoxybenzoic acid glucose ester	C14H18O9	4.62817	329.089	neg	M-H, M+Cl	101687175	AKQPDLWSZUWOPL-CGUBKOMSSA-N	COC1=CC=CC(=C1O)C(=O)O[C@H]2[C@@H]([C@H]([C@@H]([C@H](O2)CO)O)O)O	75.6	Organic oxygen compounds	Organooxygen compounds	Carbohydrates and carbohydrate conjugates	49929.4	1269.3	0	0
4.21_359.0629m/z	norbergenin	C13H14O9	4.21223	359.063	neg	M+FA-H	90476206	GDYGAIKPBLFCKR-OIPGZRGRSA-N	C1=C2C(=C(C(=C1O)O)O)[C@H]3[C@@H]([C@H]([C@@H]([C@H](O3)CO)O)O)OC2=O	75.3	Benzenoids	Benzene and substituted derivatives	Benzoic acids and derivatives	74714	0	0	0
7.24_261.0406m/z	Bergapten	C12H8O4	7.23905	261.041	neg	M+FA-H	2355	BGEBZHIAGXMEMV-UHFFFAOYSA-N	COC1=C2C=CC(=O)OC2=CC3=C1C=CO3	75.3	Phenylpropanoids and polyketides	Coumarins and derivatives	Furanocoumarins	902.076	0	506.014	70349.3
6.14_295.0982m/z	15,16-Dihydrotanshindiol C	C18H18O5	6.13517	295.098	neg	M-H2O-H	102004772	HSWJBFKCVPRBJO-GNGYTGERSA-N	CC1COC2=C1C(=O)C(=O)C3=C2C=CC4=C3CC[C@H]([C@]4(C)O)O	75.1	Lipids and lipid-like molecules	Prenol lipids	Diterpenoids	0	244.109	169.971	29155.9
5.31_337.0572m/z	3,4,5-trihydroxy-6-[(2-oxo-2H-chromen-8-yl)oxy]oxane-2-carboxylic acid	C15H14O9	5.30907	337.057	neg	M-H				75				169860	2176.67	0	771.446
6.45_459.1304m/z	6''-Acetylliquiritin	C23H24O10	6.44925	459.13	neg	M-H	131753130	HKUBLIRXXFRGKE-UHFFFAOYSA-N	CC(=O)OCC1C(C(C(C(O1)OC2=CC=C(C=C2)C3CC(=O)C4=C(O3)C=C(C=C4)O)O)O)O	75	Phenylpropanoids and polyketides	Flavonoids	Flavonoid glycosides	2369.14	0	0	79184.5
8.08_372.1221n	6-(2,4-dihydroxyphenyl)-2-(2,6-dihydroxyphenyl)-5-hydroxy-4-methylcyclohex-3-ene-1-carboxylic acid	C20H20O7	8.08432	371.115	neg	M-H, M+Cl	131832895	NJSWAMFGWCSXPA-UHFFFAOYSA-N	CC1=CC(C(C(C1)(C2=C(C=C(C=C2)O)O)O)C(=O)O)C3=C(C=CC=C3O)O	75	Benzenoids	Phenols	Benzenediols	519070	19973.7	66.8089	0
4.48_445.1362m/z	3,4,5-trihydroxy-6-{[5-(4-hydroxy-3-methoxyphenyl)pentanoyl]oxy}oxane-2-carboxylic acid	C18H24O10	4.47788	445.136	neg	M+FA-H	131834114	DVLIGZVETQKZSH-UHFFFAOYSA-N	COC1=C(C=CC(=C1)CCCCC(=O)OC2C(C(C(C(O2)C(=O)O)O)O)O)O	74.8	Organic oxygen compounds	Organooxygen compounds	Carbohydrates and carbohydrate conjugates	20699.8	0	59468	0
7.83_403.2714m/z	13,14-Dihydro PGF-1a	C20H38O5	7.83188	403.271	neg	M+FA-H	5311239	WMHAOJIJVNDMKA-BRIYLRKRSA-N	CCCCC[C@@H](CC[C@H]1[C@@H](C[C@@H]([C@@H]1CCCCCCC(=O)O)O)O)O	74.8	Lipids and lipid-like molecules	Fatty Acyls	Eicosanoids	0	0	123233	5370.3
0.65_173.1049m/z	L-Arginine	C6H14N4O2	0.647217	173.105	neg	M-H	6322	ODKSFYDXXFIFQN-BYPYZUCNSA-N	C(C[C@@H](C(=O)O)N)CN=C(N)N	74.6	Organic acids and derivatives	Carboxylic acids and derivatives	Amino acids, peptides, and analogues	689133	0	0	0
9.98_435.2405m/z	Ustusolate A	C23H34O5	9.98083	435.24	neg	M+FA-H				74.4				27417.3	6736.8	1410.16	1660.33
7.19_263.1290m/z	(+)-Abscisic acid	C15H20O4	7.18903	263.129	neg	M-H	5280896	JLIDBLDQVAYHNE-YKALOCIXSA-N	CC1=CC(=O)CC([C@]1(/C=C/C(=C\C(=O)O)/C)O)(C)C	74.3	Lipids and lipid-like molecules	Prenol lipids	Sesquiterpenoids	141.175	0	17809.4	0
4.96_341.0890m/z	3,4,5-trihydroxy-6-[4-hydroxy-3-(3-hydroxyprop-1-en-1-yl)phenoxy]oxane-2-carboxylic acid	C15H18O9	4.95508	341.089	neg	M-H				73.9				26530.3	7592.26	0	0
8.20_389.0888m/z	Petiolin F	C19H20O10	8.19708	389.089	neg	M-H2O-H	44473468	DWDGUCPATVTPNQ-LYIAWLSCSA-N	C[C@H]1[C@@H]([C@H]([C@H]([C@@H](O1)OC2=CC(=CC(=C2C(=O)C3=CC(=CC(=C3)O)O)O)O)O)O)O	73.9	Organic oxygen compounds	Organooxygen compounds	Carbohydrates and carbohydrate conjugates	27673	0	0	0
6.80_221.0461m/z	Isofraxidin	C11H10O5	6.79998	221.046	neg	M-H	5318565	HOEVRHHMDJKUMZ-UHFFFAOYSA-N	COC1=C(C(=C2C(=C1)C=CC(=O)O2)OC)O	73.8	Phenylpropanoids and polyketides	Coumarins and derivatives	Hydroxycoumarins	3635.94	2654.89	5597.44	12524.7
4.11_687.2075m/z	(-)-Matairesinol 4'-[apiosyl-(1->2)-glucoside]	C31H40O15	4.1099	687.207	neg	M+Cl				73.8				392343	581.79	0	0
5.53_265.0719m/z	Isoeugenitin	C12H12O4	5.53398	265.072	neg	M+FA-H	12310980	DFAAYQHTFVTATL-UHFFFAOYSA-N	CC1=CC(=O)C2=C(O1)C(=C(C=C2O)OC)C	73.8	Organoheterocyclic compounds	Benzopyrans	1-benzopyrans	2.07538e+06	144632	554.964	52181.5
10.51_309.2077m/z	9-Oxo-12,13-Epoxy-10-Octadecenoic acid	C18H30O4	10.5099	309.208	neg	M-H	5283007	RCMABBHQYMBYKV-BUHFOSPRSA-N	CCCCCC1C(O1)/C=C/C(=O)CCCCCCCC(=O)O	73.7	Lipids and lipid-like molecules	Fatty Acyls	Fatty acids and conjugates	92851.1	29606	39276.4	8886.1
5.28_164.0477n	2-Hydroxycinnamic acid	C9H8O3	5.2849	163.04	neg	M-H, 2M-H, M+Cl	637540	PMOWTIHVNWZYFI-AATRIKPKSA-N	C1=CC=C(C(=C1)/C=C/C(=O)O)O	73.5	Phenylpropanoids and polyketides	Cinnamic acids and derivatives	Hydroxycinnamic acids and derivatives	68541.9	54624	1.35162e+07	53572.3
6.22_383.0783m/z	8-hydroxy-2H-chromen-2-one	C9H6O3	6.22273	383.078	neg	2M+Hac-H				73.1				1.32246	0	1106.81	27495.2
5.41_349.0939m/z	4-Methyl-epicatechin	C16H16O6	5.40997	349.094	neg	M+FA-H				73.1				23729.9	0	0	0
5.12_179.0355m/z	caffeic acid	C9H8O4	5.119	179.036	neg	M-H	689043	QAIPRVGONGVQAS-DUXPYHPUSA-N	C1=CC(=C(C=C1/C=C/C(=O)O)O)O	73	Phenylpropanoids and polyketides	Cinnamic acids and derivatives	Hydroxycinnamic acids and derivatives	64915.6	34351.1	32903.4	44306.4
9.27_309.2076m/z	Sterebin A	C18H30O4	9.2673	309.208	neg	M-H	21681091	GUVJPXABQYFWPD-JOSLJWRDSA-N	CC(=O)/C=C/[C@@H]1[C@]2(CCCC([C@@H]2[C@H]([C@@H]([C@@]1(C)O)O)O)(C)C)C	72.9	Lipids and lipid-like molecules	Prenol lipids	Sesquiterpenoids	24356.6	12217.7	113569	10929.3
7.24_229.0511m/z	7-hydroxy-6-(3-oxobut-1-en-1-yl)-2H-chromen-2-one	C13H10O4	7.23905	229.051	neg	M-H	131835242	CYZCZHQTXQKGIS-NSCUHMNNSA-N	CC(=O)/C=C/C1=C(C=C2C(=C1)C=CC(=O)O2)O	72.8	Phenylpropanoids and polyketides	Coumarins and derivatives	Hydroxycoumarins	48747	5496.99	350.873	236.218
14.49_553.4833m/z	4-Hydroxy-16,18-tritriacontanedione	C33H64O3	14.4944	553.483	neg	M+FA-H				72.6				41049.1	101465	46763	187280
5.81_164.0477n	4-Hydroxycinnamic acid	C9H8O3	5.81003	163.04	neg	M-H, 2M-H, M+Cl	637542	NGSWKAQJJWESNS-ZZXKWVIFSA-N	C1=CC(=CC=C1/C=C/C(=O)O)O	72.6	Phenylpropanoids and polyketides	Cinnamic acids and derivatives	Hydroxycinnamic acids and derivatives	4.43756e+06	5.57123e+06	281536	3.41395e+06
10.17_309.2076m/z	Auxin a	C18H32O5	10.17	309.208	neg	M-H2O-H	92772	RKOUCPMGBBKLNK-UHFFFAOYSA-N	CCC(C)C1CC(C(=C1)C(CC(C(C(=O)O)O)O)O)C(C)CC	72.6	Lipids and lipid-like molecules	Prenol lipids	Monoterpenoids	12697	6248.21	29637	6885.91
6.60_518.1433n	Medicarpin 3-O-(6'-malonylglucoside)	C25H26O12	6.59817	517.136	neg	M-H, M+Cl				72.5				188480	20559.4	0	0
7.08_149.0613m/z	2-Methoxy-4-vinylphenol	C9H10O2	7.07528	149.061	neg	M-H	332	YOMSJEATGXXYPX-UHFFFAOYSA-N	COC1=C(C=CC(=C1)C=C)O	72.5	Benzenoids	Phenols	Methoxyphenols	894.22	1415.73	2067.05	13813.2
6.41_421.1513m/z	Cycloolivil	C20H24O7	6.41227	421.151	neg	M+FA-H	5316262	KCIQZCNOUZCRGH-VOBQZIQPSA-N	COC1=C(C=C2[C@@H]([C@H]([C@@](CC2=C1)(CO)O)CO)C3=CC(=C(C=C3)O)OC)O	72.5	Lignans, neolignans and related compounds	Aryltetralin lignans	9,9p-dihydroxyaryltetralin lignans	0	0	36107.7	428.295
1.99_164.0722m/z	D-phenylalanine	C9H11NO2	1.99078	164.072	neg	M-H	71567	COLNVLDHVKWLRT-MRVPVSSYSA-N	C1=CC=C(C=C1)C[C@H](C(=O)O)N	72.4	Organic acids and derivatives	Carboxylic acids and derivatives	Amino acids, peptides, and analogues	27372.5	264190	208201	586033
0.79_401.0949m/z	3,4,5-trihydroxy-6-{[2,3,4-trihydroxy-5-(hydroxymethyl)oxolan-2-yl]methoxy}oxane-2-carboxylic acid	C12H20O12	0.787517	401.095	neg	M+FA-H	131832081	JDDPBLSRGDRQEW-UHFFFAOYSA-N	C(C1C(C(C(O1)(COC2C(C(C(C(O2)C(=O)O)O)O)O)O)O)O)O	72.4	Organic oxygen compounds	Organooxygen compounds	Carbohydrates and carbohydrate conjugates	81793.2	2416.12	0	19.6291
7.19_201.1137m/z	Sebacic acid	C10H18O4	7.18903	201.114	neg	M-H	5192	CXMXRPHRNRROMY-UHFFFAOYSA-N	C(CCCCC(=O)O)CCCC(=O)O	72.3	Lipids and lipid-like molecules	Fatty Acyls	Fatty acids and conjugates	18159.2	53789.1	9252.52	49648.8
4.92_253.0719m/z	Ethyl caffeate	C11H12O4	4.9177	253.072	neg	M+FA-H	5317238	WDKYDMULARNCIS-GQCTYLIASA-N	CCOC(=O)/C=C/C1=CC(=C(C=C1)O)O	72.1	Phenylpropanoids and polyketides	Cinnamic acids and derivatives	Hydroxycinnamic acids and derivatives	386.391	137.984	10642.8	427.451
4.67_387.1306m/z	Shanzhiside methyl ester	C17H26O11	4.66668	387.131	neg	M-H2O-H	13892722	KKSYAZCUYVRKML-IRDZEPHTSA-N	C[C@@]1(C[C@H]([C@H]2[C@@H]1[C@@H](OC=C2C(=O)OC)O[C@H]3[C@@H]([C@H]([C@@H]([C@H](O3)CO)O)O)O)O)O	72.1	Lipids and lipid-like molecules	Prenol lipids	Terpene glycosides	1714.61	0	67907	696.071
5.51_511.3508m/z	LysoSM(d18:0)	C23H51N2O5P	5.51093	511.351	neg	M+FA-H	44260122	GSEOJHIBPQRSNH-XZOQPEGZSA-N	CCCCCCCCCCCCCCC[C@H]([C@H](COP(=O)([O-])OCC[N+](C)(C)C)N)O	71.9	Lipids and lipid-like molecules	Sphingolipids	Phosphosphingolipids	61214.7	137206	99045.3	188582
3.78_687.2073m/z	Ichangin-4-O-b-D-glucopyranoside	C32H42O14	3.78453	687.207	neg	M+K-2H	146115917	MUZOGCSYWJPGRB-PDQYAOBASA-N	C[C@@]12CCC3[C@]([C@@]14[C@H](O4)C(=O)O[C@H]2C5=COC=C5)(C(=O)C[C@H]([C@@]36COC(=O)C[C@@H]6O[C@H]7[C@@H]([C@H]([C@@H]([C@H](O7)CO)O)O)O)C(C)(C)O)C	71.8	Lipids and lipid-like molecules	Prenol lipids	Terpene glycosides	290953	0	0	0
6.56_244.1314n	4-Oxododecanedioic acid	C12H20O5	6.5605	243.124	neg	M-H, M+Na-2H	13213508	HHXMOTDTSDYYEI-UHFFFAOYSA-N	C(CCCC(=O)CCC(=O)O)CCCC(=O)O	71.7	Organic acids and derivatives	Keto acids and derivatives	Medium-chain keto acids and derivatives	88315.8	85816	240723	41442.7
4.72_291.0625m/z	5'-Deoxy-5-fluorouridine	C9H11FN2O5	4.71717	291.063	neg	M+FA-H	14608008	JIWIXZJAAUQOCE-XVFCMESISA-N	C1=CN(C(=O)NC1=O)[C@H]2[C@@H]([C@@H]([C@H](O2)CF)O)O	71.5	Nucleosides, nucleotides, and analogues	5'-deoxyribonucleosides		0	0	24010	0
6.41_319.1308m/z	Nicotine glucuronide	C16H22N2O6	6.41227	319.131	neg	M-H2O-H	3035848	SAWAIULJDYFLPD-SOAFEQHCSA-N	CN1CCC[C@H]1C2=C[N+](=CC=C2)[C@@H]3[C@@H]([C@H]([C@@H]([C@H](O3)C(=O)[O-])O)O)O	71.2	Organic oxygen compounds	Organooxygen compounds	Carbohydrates and carbohydrate conjugates	0	15.3115	0	12618.8
7.43_259.0614m/z	8-(1,2-dihydroxypropan-2-yl)-9-hydroxy-2H,8H,9H-furo[2,3-h]chromen-2-one	C14H14O6	7.42895	259.061	neg	M-H2O-H				71.2				1800.68	371.613	0	19758.9
7.91_383.0783m/z	5-hydroxy-3-(hydroxymethyl)-1H-isochromen-1-one	C10H8O4	7.90617	383.078	neg	2M-H				71.1				0	1091.14	0	29511.4
7.03_353.1039m/z	Fibraurin	C20H20O7	7.02623	353.104	neg	M-H2O-H	21626387	XUFRUKAPNGPYSR-TZGNGTQESA-N	C[C@@]12CC=C3C(=O)O[C@H](C[C@]3([C@@H]1[C@H]4[C@H]5[C@@H]([C@@]2(C(=O)O4)O)O5)C)C6=COC=C6	71	Organoheterocyclic compounds	Naphthopyrans		20780.3	4781.25	59076.9	242896
7.86_269.0456m/z	apigenin	C15H10O5	7.85835	269.046	neg	M-H	5280443	KZNIFHPLKGYRTM-UHFFFAOYSA-N	C1=CC(=CC=C1C2=CC(=O)C3=C(C=C(C=C3O2)O)O)O	70.9	Phenylpropanoids and polyketides	Flavonoids	Flavones	121499	37316	29819.5	40740.8
4.96_319.1195m/z	5-hydroxy-8-(2-hydroxypropan-2-yl)-4-(3-hydroxypropyl)-2H,8H,9H-furo[2,3-h]chromen-2-one	C17H20O6	4.95508	319.119	neg	M-H				70.8				0	624.839	0	49158.9
6.06_341.1033m/z	8-(1,2-dihydroxypropan-2-yl)-2-oxo-2H,8H,9H-furo[2,3-h]chromen-9-yl 3-methylbut-2-enoate	C19H20O7	6.05957	341.103	neg	M-H2O-H				70.6				38961.7	6597.12	7777.65	36313.1
0.65_154.0627m/z	L-2-Amino-3-(1-pyrazolyl)propanoic acid	C6H9N3O2	0.647217	154.063	neg	M-H	119630	PIGOPELHGLPKLL-UHFFFAOYSA-N	C1=CN(N=C1)CC(C(=O)O)N	70.5	Organic acids and derivatives	Carboxylic acids and derivatives	Amino acids, peptides, and analogues	116202	0	0	0
14.59_455.1863m/z	4,5-Dihydro-drospirenone-3-sulfate	C24H34O5S	14.5863	455.186	neg	M+Na-2H				70.5				19123.4	17779.8	26448.9	16501.5
9.29_329.1765m/z	carnosol	C20H26O4	9.29327	329.176	neg	M-H	442009	XUSYGBPHQBWGAD-PJSUUKDQSA-N	CC(C)C1=C(C(=C2C(=C1)[C@@H]3C[C@@H]4[C@@]2(CCCC4(C)C)C(=O)O3)O)O	70.5	Lipids and lipid-like molecules	Prenol lipids	Terpene lactones	6587.91	1151.3	16995.1	2351.33
9.55_221.1552m/z	L-Menthyl acetoacetate	C14H24O3	9.5546	221.155	neg	M-H2O-H	43045	QSVQIPXQOCAWHP-UHTWSYAYSA-N	C[C@H]1CC[C@@H]([C@H](C1)OC(=O)CC(=O)C)C(C)C	70.4	Lipids and lipid-like molecules	Prenol lipids	Monoterpenoids	39710.4	85717.8	128982	54361.3
7.72_353.1040m/z	Moracin G	C19H16O4	7.71845	353.104	neg	M+FA-H	5319890	PRQYZCKJWCQXNM-UHFFFAOYSA-N	CC1=CCC2=C(C=CC3=C2OC(=C3)C4=CC(=CC(=C4)O)O)OC1	70.4	Phenylpropanoids and polyketides	2-arylbenzofuran flavonoids		28931.8	2419.16	0	0
5.85_403.1046m/z	5,8-Dihydroxy-3-(4-hydroxybenzyl)-7-methoxy-4-chromanone 8-acetate	C19H18O7	5.84692	403.105	neg	M+FA-H	21627907	NXGGYXKVAVMQLL-UHFFFAOYSA-N	CC(=O)OC1=C(C=C(C2=C1OCC(C2=O)CC3=CC=C(C=C3)O)O)OC	70	Phenylpropanoids and polyketides	Homoisoflavonoids	Homoisoflavans	0	2114.08	225383	50329.8
5.93_478.1485n	6''-O-Acetylphloridzin	C23H26O11	5.93435	477.141	neg	M-H, M+Cl	38357854	WKDMJJFSCAZJHE-DODNOZFWSA-N	CC(=O)OC[C@@H]1[C@H]([C@@H]([C@H]([C@@H](O1)OC2=CC(=CC(=C2C(=O)CCC3=CC=C(C=C3)O)O)O)O)O)O	69.9	Phenylpropanoids and polyketides	Flavonoids	Flavonoid glycosides	325623	7196.32	3220.06	0
7.59_226.1209n	12-Hydroxyjasmonic acid	C12H18O4	7.59342	225.114	neg	M-H, M+Cl	5497122	RZGFUGXQKMEMOO-BSANDHCLSA-N	C1CC(=O)[C@@H]([C@H]1CC(=O)O)C/C=C\CCO	69.8	Lipids and lipid-like molecules	Fatty Acyls	Lineolic acids and derivatives	21621.2	118334	15311.4	259186
7.78_431.1361m/z	1-(2,4-dihydroxy-5-methoxyphenyl)-7-(4-hydroxy-3-methoxyphenyl)hept-1-ene-3,5-dione	C21H22O7	7.78217	431.136	neg	M+FA-H				69.6				0	0	33332.1	0
7.64_343.0834m/z	Usnic acid	C18H16O7	7.6433	343.083	neg	M-H	442614	WEYVVCKOOFYHRW-GOSISDBHSA-N	CC1=C(C(=C2C(=C1O)[C@]3(C(=CC(=C(C3=O)C(=O)C)O)O2)C)C(=O)C)O	69.5	Benzenoids	Benzene and substituted derivatives	Acetophenones	5334.58	538.114	35568.7	23479.6
5.92_585.2001m/z	Yuanhuafin	C29H32O10	5.92145	585.2	neg	M+FA-H	158277	YUNIKDZHTDZEHX-RWCOBRMTSA-N	C[C@@H]1[C@H]([C@]2([C@H]3[C@H]4[C@]1(C5C=C(C(=O)[C@]5([C@@H]([C@@]6([C@H]4O6)CO)O)O)C)O[C@](O3)(O2)C7=CC=CC=C7)C(=C)C)OC(=O)C	69.3	Lipids and lipid-like molecules	Prenol lipids	Diterpenoids	0	0	89419.5	66138.2
5.02_361.0704m/z	trans-p-Coumaric acid 4-glucoside	C15H18O8	5.01838	361.07	neg	M+Cl	9840292	LJFYQZQUAULRDF-FDGSXQGBSA-N	C1=CC(=CC=C1/C=C/C(=O)O)O[C@H]2[C@@H]([C@H]([C@@H]([C@H](O2)CO)O)O)O	69.1	Organic oxygen compounds	Organooxygen compounds	Carbohydrates and carbohydrate conjugates	71843.1	0	0	0
5.03_247.0252m/z	Bergaptol	C11H6O4	5.03143	247.025	neg	M+FA-H	5280371	GIJHDGJRTUSBJR-UHFFFAOYSA-N	C1=CC(=O)OC2=CC3=C(C=CO3)C(=C21)O	69.1	Phenylpropanoids and polyketides	Coumarins and derivatives	Furanocoumarins	23922	0	0	0
7.29_213.1137m/z	2,2'-(3-Methylcyclohexane-1,1-diyl)diacetic acid	C11H18O4	7.28918	213.114	neg	M-H	220370	HJPDHTDUPWGUHP-UHFFFAOYSA-N	CC1CCCC(C1)(CC(=O)O)CC(=O)O	69	Organic acids and derivatives	Carboxylic acids and derivatives	Dicarboxylic acids and derivatives	2595.54	4901.52	59195.7	5869.78
4.66_395.0997m/z	Quinolacetic acid	C8H8O4	4.65503	395.1	neg	2M+Hac-H	6453213	RFJUCKOEXRTZPN-UHFFFAOYSA-N	C1=CC(C=CC1=O)(CC(=O)O)O	69	Organic oxygen compounds	Organooxygen compounds	Alcohols and polyols	85771.8	0	0	0
6.82_201.1137m/z	2-Hydroxy-2,6,6-trimethylcyclohexanone	C9H16O2	6.82312	201.114	neg	M+FA-H	101115	FWCGLHYHGUHPRY-UHFFFAOYSA-N	CC1(CCCC(C1=O)(C)O)C	68.9	Organic oxygen compounds	Organooxygen compounds	Carbonyl compounds	6698.99	10436	277829	9047.37
6.03_223.0616m/z	Elenaic acid	C11H14O6	6.0349	223.062	neg	M-H2O-H	169607	MQFAJBBHEYTHKF-BIIVOSGPSA-N	C[C@H]1[C@H]([C@@H](C(=CO1)C(=O)OC)CC(=O)O)C=O	68.8	Organic acids and derivatives	Carboxylic acids and derivatives	Dicarboxylic acids and derivatives	142985	16677.6	205039	46361.2
5.98_351.0732m/z	Hydramicromelin B	C15H14O7	5.98388	351.073	neg	M+FA-H	21575176	XSUHWPFITUMCFA-NFAWXSAZSA-N	C[C@@]1([C@@H]([C@H](OC1=O)C2=C(C=C3C(=C2)C=CC(=O)O3)OC)O)O	68.6	Phenylpropanoids and polyketides	Coumarins and derivatives		16607.6	0	0	0
6.75_321.1252m/z	N6-cis-p-Coumaroylserotonin	C19H18N2O3	6.75052	321.125	neg	M-H	5458879	WLZPAFGVOWCVMG-FPYGCLRLSA-N	C1=CC(=CC=C1/C=C/C(=O)NCCC2=CNC3=C2C=C(C=C3)O)O	68.6	Organoheterocyclic compounds	Indoles and derivatives	Tryptamines and derivatives	0	0	42675.2	4656.19
5.67_209.0460m/z	4-methoxy-1-benzofuran-6-ol	C9H8O3	5.67267	209.046	neg	M+FA-H				68.5				12133.9	14507.7	301522	33871
6.00_525.1981m/z	Phomopsinone D	C12H16O5	5.9971	525.198	neg	2M+FA-H	101578425	VWYYNACOORUTNR-GZMMTYOYSA-N	CCC[C@H]1[C@H](C2=C(CO1)C(=CC(=O)O2)OC)O	68.4	Organoheterocyclic compounds	Pyrans	Pyranones and derivatives	0	0	257149	0
4.31_167.0354m/z	Vanillic acid	C8H8O4	4.31363	167.035	neg	M-H	8468	WKOLLVMJNQIZCI-UHFFFAOYSA-N	COC1=C(C=CC(=C1)C(=O)O)O	68.1	Benzenoids	Benzene and substituted derivatives	Benzoic acids and derivatives	37018.7	44351.9	391514	53913.4
4.98_287.0564m/z	aromadendrin	C15H12O6	4.98032	287.056	neg	M-H	122850	PADQINQHPQKXNL-LSDHHAIUSA-N	C1=CC(=CC=C1[C@@H]2[C@H](C(=O)C3=C(C=C(C=C3O2)O)O)O)O	68	Phenylpropanoids and polyketides	Flavonoids	Flavans	0	182.049	56862.9	238.102
7.30_423.2398m/z	Annoglabasin F	C22H34O5	7.30183	423.24	neg	M+FA-H	10785922	XLXLWRGGUYSHOH-WBUFBUKVSA-N	CC(=O)O[C@@]1(C[C@@]23CC[C@H]4[C@]([C@@H]2CC[C@@H]1C3)(CCC[C@@]4(C)O)C)C(=O)OC	67.9	Lipids and lipid-like molecules	Prenol lipids	Diterpenoids	0	0	46024.5	433.411
14.48_489.2781m/z	Aburatubolactam A	C30H40N2O5	14.4809	489.278	neg	M-H2O-H	132350823	RYVUSTXQTVYINS-CKZXNOOWSA-N	CC[C@@H]1C[C@@H]2C[C@H]3/C=C\C=C\C(=O)NCC[C@@H]([C@H]4C(=O)/C(=C(/C=C/C=C/C[C@H]3[C@@H]2[C@H]1C)\O)/C(=O)N4C)O	67.7	Phenylpropanoids and polyketides	Macrolactams		0	56507.6	51262.1	26218.8
6.80_325.1088m/z	Decursitin D	C19H20O6	6.79998	325.109	neg	M-H2O-H	122169319	AESJNSAMTDSWJU-RQJZHBNNSA-N	C/C=C(/C)\C(=O)O[C@H]1[C@H](C(OC2=C1C=C3C=CC(=O)OC3=C2)(C)C)O	67.6	Phenylpropanoids and polyketides	Coumarins and derivatives	Pyranocoumarins	0	0	334.326	12712.3
6.80_253.0508m/z	Nordalbergin	C15H10O4	6.79998	253.051	neg	M-H	5320203	TZRNJQYCOSMOJS-UHFFFAOYSA-N	C1=CC=C(C=C1)C2=CC(=O)OC3=CC(=C(C=C23)O)O	67.5	Phenylpropanoids and polyketides	Neoflavonoids	Neoflavones	151.6	320.398	21789.6	0
4.64_289.0720m/z	p-Hydroxy-5,6-dehydrokawain	C14H12O4	4.64167	289.072	neg	M+FA-H	10243535	VWYHYOYHRIWSJU-QPJJXVBHSA-N	COC1=CC(=O)OC(=C1)/C=C/C2=CC=C(C=C2)O	67.5	Phenylpropanoids and polyketides	Kavalactones		825.563	1563.78	50951	2464.11
5.28_403.1259m/z	Secoxyloganin	C17H24O11	5.2849	403.126	neg	M-H	162868	MQLSOVRLZHTATK-PEYNGXJCSA-N	COC(=O)C1=CO[C@H]([C@@H]([C@@H]1CC(=O)O)C=C)O[C@H]2[C@@H]([C@H]([C@@H]([C@H](O2)CO)O)O)O	67.4	Lipids and lipid-like molecules	Prenol lipids	Terpene glycosides	0	0	22978.7	0
6.60_265.0719m/z	2-O-Benzoyl-D-glucose	C13H16O7	6.59817	265.072	neg	M-H2O-H	14704603	RIDPBVGJGNVNFX-UHFFFAOYSA-N	C1=CC=C(C=C1)C(=O)OC2C(C(C(OC2O)CO)O)O	67.2	Organic oxygen compounds	Organooxygen compounds	Carbohydrates and carbohydrate conjugates	47188.9	2279.32	0	200.278
8.06_341.1040m/z	7-Hydroxy-R-phenprocoumon	C18H16O4	8.0579	341.104	neg	M+FA-H	91987769	BKRXPRMCBOAGQH-CYBMUJFWSA-N	CC[C@H](C1=CC=CC=C1)C2=C(C3=C(C=CC(=C3)O)OC2=O)O	67	Phenylpropanoids and polyketides	Coumarins and derivatives	Hydroxycoumarins	16208.8	407.847	30728.9	70233.5
13.12_277.1450m/z	Furanogermenone	C15H20O2	13.1178	277.145	neg	M+FA-H	6439596	ZLESWHXADLWJPV-VQNWOSHQSA-N	C[C@H]1CC/C=C(\CC2=C(CC1=O)C(=CO2)C)/C	66.6	Lipids and lipid-like molecules	Prenol lipids	Sesquiterpenoids	8143.88	79278.1	1918.37	2055.56
5.16_397.0790m/z	3,4,5-trihydroxy-6-[(1-oxo-1H-isochromen-3-yl)methoxy]oxane-2-carboxylic acid	C16H16O9	5.15758	397.079	neg	M+FA-H				66.4				111630	20466.2	0	0
1.51_513.1470m/z	2-Isopropyl citrate	C9H14O7	1.50847	513.147	neg	2M+FA-H				66.3				67236.5	67770.6	0	0
5.04_447.2245m/z	Neryl arabinofuranosyl-glucoside	C21H36O10	5.04435	447.225	neg	M-H	18688995	AWDKYYYAAQQLEF-GHXNOFRVSA-N	CC(=CCC/C(=C\COC1C(C(C(C(O1)COC2C(C(C(O2)CO)O)O)O)O)O)/C)C	66.3	Lipids and lipid-like molecules	Prenol lipids	Terpene glycosides	0	128.646	55943.3	0
7.09_329.1402m/z	8-Angeloylegelolide	C19H24O6	7.08808	329.14	neg	M-H2O-H				66.2				128530	57824.5	0	0
6.64_421.1512m/z	Olivil	C20H24O7	6.6368	421.151	neg	M+FA-H				66.2				1539.96	0	26058	0
5.13_760.2900n	Albanin G	C45H44O11	5.13213	759.283	neg	M-H, M+Na-2H				66.1				0	51870.1	66422.7	0
6.51_188.1054n	Azelaic acid	C9H16O4	6.5111	187.098	neg	M-H, M+Cl, M+Na-2H	2266	BDJRBEYXGGNYIS-UHFFFAOYSA-N	C(CCCC(=O)O)CCCC(=O)O	66.1	Lipids and lipid-like molecules	Fatty Acyls	Fatty acids and conjugates	403513	682073	59553	544573
0.73_254.9495m/z	Ribose-1-arsenate	C5H11AsO8	0.7319	254.95	neg	M-H2O-H				66.1				0	0	555347	0
5.98_295.0466m/z	6-(2H-1,3-benzodioxol-5-yloxy)-3,4,5-trihydroxyoxane-2-carboxylic acid	C13H14O9	5.98388	295.047	neg	M-H2O-H				66.1				426148	430.257	0	0
1.07_457.1207m/z	Raltitrexed	C21H22N4O6S	1.067	457.121	neg	M-H				66.1				3874.87	30993.9	0	893610
7.40_265.0719m/z	Hispolone	C12H12O4	7.40348	265.072	neg	M+FA-H				66				30085.1	171.096	0	0
0.76_104.0355m/z	Protein serine	C3H7NO3	0.757683	104.035	neg	M-H				65.9				95789	0	468.155	0
4.77_321.0260m/z	3,4-dihydroxy-5-(3,4,5-trihydroxybenzoyloxy)benzoic acid	C14H10O9	4.76742	321.026	neg	M-H				65.8				508013	17377.2	18010.4	2691.75
11.25_331.1923m/z	Excisanin A	C20H30O5	11.2525	331.192	neg	M-H2O-H				65.8				19701.2	8498.14	15268.5	9762.48
5.34_236.0689n	Austdiol	C12H12O5	5.33627	235.062	neg	M-H, 2M+FA-H	40604	QVMUHZHZYCDMAI-RYUDHWBXSA-N	CC1=CC2=C(C(=O)[C@]([C@H](C2=CO1)O)(C)O)C=O	65.7	Organoheterocyclic compounds	Azaphilones		142381	15276.8	882.373	6563.94
12.32_361.1880m/z	(S)-alpha-Terpinyl glucoside	C16H28O6	12.3213	361.188	neg	M+FA-H	13325862	NZNWCYFBFHHMLM-UHFFFAOYSA-N	CC1=CCC(CC1)C(C)(C)OC2C(C(C(C(O2)CO)O)O)O	65.4	Organic oxygen compounds	Organooxygen compounds	Carbohydrates and carbohydrate conjugates	0	26443.9	2523.28	30614.2
7.04_434.1227n	Robustaside D	C21H22O10	7.03762	433.115	neg	M-H, M+Cl	38358972	KQIQKULTIAJZKL-VHFDLOJPSA-N	C1=CC(=CC=C1O)O[C@H]2[C@@H]([C@H]([C@@H]([C@H](O2)COC(=O)/C=C/C3(C=CC(=O)C=C3)O)O)O)O	65.2	Lipids and lipid-like molecules	Saccharolipids		100186	0	0	0
10.11_307.1921m/z	(6E,8E,10S,12Z)-10-Hydroxy-3-oxooctadecatrienoic acid	C18H28O4	10.1072	307.192	neg	M-H	134819278	DASVGFACDRAZQR-CKBRMXFCSA-N	CCCCC/C=C\C[C@@H](/C=C/C=C/CCC(=O)CC(=O)O)O	65.1				15145.2	3481.88	9694.91	1867.6
1.50_207.0780m/z	Formyl-5-hydroxykynurenamine	C10H12N2O3	1.49548	207.078	neg	M-H	440743	CKAXPTWYSHDIBN-UHFFFAOYSA-N	C1=CC(=C(C=C1O)C(=O)CCN)NC=O	65	Organic oxygen compounds	Organooxygen compounds	Carbonyl compounds	0	0	114982	0
5.13_167.0355m/z	5-Methoxysalicylic acid	C8H8O4	5.13213	167.035	neg	M-H	75787	IZZIWIAOVZOBLF-UHFFFAOYSA-N	COC1=CC(=C(C=C1)O)C(=O)O	64.9	Benzenoids	Benzene and substituted derivatives	Benzoic acids and derivatives	125920	94129	36771.8	134770
12.61_249.1499m/z	Quadrangolin A	C15H22O3	12.6113	249.15	neg	M-H	133556420	QTSQCCVLTMKKDP-COMQUAJESA-N	C[C@@]12CCCC(=C)[C@H]1[C@@H]([C@H](CC2)C(=C)C(=O)O)O	64.8	Lipids and lipid-like molecules	Prenol lipids	Sesquiterpenoids	2373.18	7124.41	4510.52	6648.56
8.42_230.1522n	Dodecanedioic acid	C12H22O4	8.4235	229.145	neg	M-H, M+Na-2H	12736	TVIDDXQYHWJXFK-UHFFFAOYSA-N	C(CCCCCC(=O)O)CCCCC(=O)O	64.4	Lipids and lipid-like molecules	Fatty Acyls	Fatty acids and conjugates	4510.39	17907.3	119763	17889.1
0.80_342.1173n	sucrose	C12H22O11	0.797333	341.11	neg	M-H, M+FA-H, M+Cl	5988	CZMRCDWAGMRECN-UGDNZRGBSA-N	C([C@@H]1[C@H]([C@@H]([C@H]([C@H](O1)O[C@]2([C@H]([C@@H]([C@H](O2)CO)O)O)CO)O)O)O)O	64.3	Organic oxygen compounds	Organooxygen compounds	Carbohydrates and carbohydrate conjugates	436841	2.15577e+06	2.43616e+06	1.07194e+06
8.02_381.0991m/z	6-Deoxy-8-O-methylrabelomycin	C20H16O5	8.02028	381.099	neg	M+FA-H	164046	XZLGWJORNHETKI-UHFFFAOYSA-N	CC1(CC2=C(C(=O)C1)C3=C(C=C2)C(=O)C4=C(C3=O)C=CC=C4OC)O	64.2	Phenylpropanoids and polyketides	Angucyclines		20535.2	442.464	0	0
4.36_299.0779m/z	4-{hydroxy[(3,4,5,6-tetrahydroxyoxan-2-yl)methoxy]methylidene}cyclohexa-2,5-dien-1-one	C13H16O8	4.36387	299.078	neg	M-H	131831648	KBOQXAVWJMJUBC-UHFFFAOYSA-N	C1=CC(=CC=C1C(=O)OCC2C(C(C(C(O2)O)O)O)O)O	64.2	Benzenoids	Benzene and substituted derivatives	Benzoic acids and derivatives	21372.5	448.644	0	0
7.23_490.1482n	4',5,6-Trimethylscutellarein 7-glucoside	C24H26O11	7.2255	489.141	neg	M-H, M+Cl				64.2				111306	354.605	0	0
7.38_341.1039m/z	Edulisin IV	C19H20O7	7.37705	341.104	neg	M-H2O-H				64				32914.5	14261.2	1874.62	6383.95
0.73_271.1049m/z	L-Carnosine	C9H14N4O3	0.7319	271.105	neg	M+FA-H	439224	CQOVPNPJLQNMDC-ZETCQYMHSA-N	C1=C(NC=N1)C[C@@H](C(=O)O)NC(=O)CCN	64	Organic acids and derivatives	Peptidomimetics	Hybrid peptides	25126.6	0	0	0
5.18_287.0564m/z	Hydramicromelin D	C15H14O7	5.18203	287.056	neg	M-H2O-H	102584164	XSUHWPFITUMCFA-IPYPFGDCSA-N	C[C@@]1([C@H]([C@H](OC1=O)C2=C(C=C3C(=C2)C=CC(=O)O3)OC)O)O	63.9	Phenylpropanoids and polyketides	Coumarins and derivatives		485.139	654.725	32416.9	1841.26
4.90_183.0304m/z	Methyl gallate	C8H8O5	4.90465	183.03	neg	M-H	7428	FBSFWRHWHYMIOG-UHFFFAOYSA-N	COC(=O)C1=CC(=C(C(=C1)O)O)O	63.9	Benzenoids	Benzene and substituted derivatives	Benzoic acids and derivatives	21638.1	14169.8	49005.9	16758.9
9.02_243.1604m/z	1,11-Undecanedicarboxylic acid	C13H24O4	9.01758	243.16	neg	M-H	10458	DXNCZXXFRKPEPY-UHFFFAOYSA-N	C(CCCCCC(=O)O)CCCCCC(=O)O	63.8	Lipids and lipid-like molecules	Fatty Acyls	Fatty acids and conjugates	6659.96	10776	41959.9	14880.7
5.30_356.1116n	Gentiopicroside	C16H20O9	5.29675	355.104	neg	M-H, M+Cl	88708	DUAGQYUORDTXOR-GPQRQXLASA-N	C=C[C@H]1[C@@H](OC=C2C1=CCOC2=O)O[C@H]3[C@@H]([C@H]([C@@H]([C@H](O3)CO)O)O)O	63.8	Organic oxygen compounds	Organooxygen compounds	Carbohydrates and carbohydrate conjugates	265686	136178	0	5514.41
4.10_299.0779m/z	1-(4-Hydroxybenzoyl)glucose	C13H16O8	4.09793	299.078	neg	M-H	14132342	XWTGDGASXRARSP-HMUNZLOLSA-N	C1=CC(=CC=C1C(=O)O[C@H]2[C@@H]([C@H]([C@@H]([C@H](O2)CO)O)O)O)O	63.5	Organic oxygen compounds	Organooxygen compounds	Carbohydrates and carbohydrate conjugates	24607.6	1227.2	0	0
7.06_328.0596m/z	Obscurolide A1	C15H17NO5	7.06262	328.06	neg	M+K-2H	6438770	IZSWILLJDXDGDJ-FARCUNLSSA-N	CC(/C=C/C1C(CC(=O)O1)NC2=CC=C(C=C2)C(=O)O)O	63.4	Benzenoids	Benzene and substituted derivatives	Benzoic acids and derivatives	2105.67	0	7178.6	5018.32
6.03_303.0880m/z	Protosappanin B	C16H16O6	6.0349	303.088	neg	M-H	13846689	QRTYTQTVJQUCEP-UHFFFAOYSA-N	C1C2=CC(=C(C=C2C3=C(C=C(C=C3)O)OCC1(CO)O)O)O	63.3	Organic oxygen compounds	Organooxygen compounds	Ethers	102092	5153.83	0	0
5.76_491.1200m/z	Physcion 8-glucoside	C22H22O10	5.75975	491.12	neg	M+FA-H	5319323	WLXGUTUUWXVZNM-DQMLXFRHSA-N	CC1=CC2=C(C(=C1)O[C@H]3[C@@H]([C@H]([C@@H]([C@H](O3)CO)O)O)O)C(=O)C4=C(C2=O)C=C(C=C4O)OC	63.2	Benzenoids	Anthracenes	Anthraquinones	1953	0	600515	0
6.69_138.0200m/z	4-Nitrophenol	C6H5NO3	6.68702	138.02	neg	M-H	980	BTJIUGUIPKRLHP-UHFFFAOYSA-N	C1=CC(=CC=C1[N+](=O)[O-])O	63.1	Benzenoids	Phenols	Nitrophenols	46604.2	44774.2	228128	34348.8
8.65_507.1305m/z	Artomunoxanthentrione epoxide	C26H22O8	8.65125	507.13	neg	M+FA-H	15725888	HYOUKKTWDGSFHB-UHFFFAOYSA-N	CC(=C)C1=C2C(=C3C(=C1)C(=O)C4=C(O3)C5=C(C=C4O)OC(C=C5)(C)C)C(=O)C=C(C2=O)OC	63	Organoheterocyclic compounds	Benzopyrans	1-benzopyrans	39046	0	4441.47	0
8.16_299.0568m/z	(2Z)-4,6-dihydroxy-2-[(3-hydroxy-4-methoxyphenyl)methylidene]-1-benzofuran-3-one	C16H12O6	8.15962	299.057	neg	M-H	16376440	HPSPCMSCDNHZJM-CHHVJCJISA-N	COC1=C(C=CC(=C1)/C=C\2/C(=O)C3=C(O2)C=C(C=C3)O)O	62.9	Phenylpropanoids and polyketides	Aurone flavonoids		32307.7	4628.6	3712.98	2075.8
7.37_369.0991m/z	Moracin K	C19H16O5	7.36568	369.099	neg	M+FA-H	118726653	HRYWITBPMMQCBB-UHFFFAOYSA-N	CC1(C=CC2=C3C(=CC(=C2O1)O)C=C(O3)C4=CC(=CC(=C4)O)O)C	62.9	Phenylpropanoids and polyketides	2-arylbenzofuran flavonoids		17875	750.279	2868.6	11662
7.72_349.1667m/z	Solanapyrone B	C18H24O4	7.71845	349.167	neg	M+FA-H	11098743	YJHFAFJKTXEFDR-SFDCBXKLSA-N	C[C@H]1C=C[C@H]2CCCC[C@H]2[C@@H]1C3=CC(=C(C(=O)O3)CO)OC	62.9	Organoheterocyclic compounds	Pyrans	Pyranones and derivatives	289.294	0	13834.3	746.938
6.61_211.0616m/z	Propyl gallate	C10H12O5	6.6113	211.062	neg	M-H	4947	ZTHYODDOHIVTJV-UHFFFAOYSA-N	CCCOC(=O)C1=CC(=C(C(=C1)O)O)O	62.8	Benzenoids	Benzene and substituted derivatives	Benzoic acids and derivatives	12376.1	6310.37	6838.06	6093.35
9.02_315.1242m/z	3-(3-Hydroxy-3-methylbutanyl)-2,4,6-trihydroxybenzophenone	C18H20O5	9.01758	315.124	neg	M-H	71307367	WBIQLKREZMXFIJ-UHFFFAOYSA-N	CC(C)(CCC1=C(C(=C(C=C1O)O)C(=O)C2=CC=CC=C2)O)O	62.8	Benzenoids	Benzene and substituted derivatives	Benzophenones	43732.2	5768.97	3560.51	2883.72
4.45_357.1200m/z	8-Epi-Loganic acid	C16H24O10	4.45152	357.12	neg	M-H2O-H	158144	JNNGEAWILNVFFD-OZFVSFPVSA-N	C[C@@H]1[C@H](C[C@H]2[C@@H]1[C@@H](OC=C2C(=O)O)O[C@H]3[C@@H]([C@H]([C@@H]([C@H](O3)CO)O)O)O)O	62.8	Lipids and lipid-like molecules	Prenol lipids	Terpene glycosides	9064.84	0	42691.2	0
5.87_225.0773m/z	8,9-Didehydro-7-hydroxydolichodial	C10H12O3	5.87112	225.077	neg	M+FA-H	3062370	HPPDWCXQOXACSB-SCZZXKLOSA-N	CC1=C([C@H](C[C@@H]1O)C(=C)C=O)C=O	62.6	Lipids and lipid-like molecules	Prenol lipids	Monoterpenoids	85544.1	5178.38	8675.74	25771.4
6.60_473.1465m/z	Globularin	C24H28O11	6.59817	473.146	neg	M-H2O-H	21603201	SCIGYBYAZUFDLA-LUVHZPKESA-N	C1=CC=C(C=C1)/C=C/C(=O)OC[C@@]23[C@@H]4[C@@H](C=CO[C@H]4O[C@H]5[C@@H]([C@H]([C@@H]([C@H](O5)CO)O)O)O)[C@@H]([C@@H]2O3)O	62.6	Organic oxygen compounds	Organooxygen compounds	Carbohydrates and carbohydrate conjugates	53743.6	1347.82	0	0
5.42_383.0995m/z	3,4,5-trihydroxy-6-{[(2E)-2-methyl-3-phenylprop-2-enoyl]oxy}oxane-2-carboxylic acid	C16H18O8	5.42245	383.099	neg	M+FA-H				62.4				24296.4	49922.8	0	787.845
5.90_195.0668m/z	4-Hydroxy-6-methyl-3-(1-oxobutyl)-2H-pyran-2-one	C10H12O4	5.89693	195.067	neg	M-H	54684273	CVTPSMRXSUPVPJ-UHFFFAOYSA-N	CCCC(=O)C1=C(C=C(OC1=O)C)O	62.1	Organic oxygen compounds	Organooxygen compounds	Carbonyl compounds	29901.2	10668.6	6990.51	20126.5
5.35_261.1345m/z	Virginiaebutanolide C	C11H20O4	5.34712	261.134	neg	M+FA-H	40565489	ONFPUQOPHZOEKF-UTLUCORTSA-N	CCCCC[C@@H]([C@@H]1[C@@H](COC1=O)CO)O	62	Lipids and lipid-like molecules	Fatty Acyls	Fatty alcohols	645.899	5868.49	111045	5590.76
9.55_236.1058m/z	Valproylglycine	C10H19NO3	9.5546	236.106	neg	M+Cl	181919	QBKXUUNBNHZZPK-UHFFFAOYSA-N	CCCC(CCC)C(=O)NCC(=O)O	61.9	Organic acids and derivatives	Carboxylic acids and derivatives	Amino acids, peptides, and analogues	67415.6	155069	232508	92786
11.25_317.2130m/z	(ent-15beta)-15,19-Dihydroxy-7-trachylobanone	C20H30O3	11.2525	317.213	neg	M-H				61.9				16394.3	2814.5	92505.4	740.526
4.19_341.0889m/z	(3,4,5,6-tetrahydroxyoxan-2-yl)methyl (2E)-3-(3,4-dihydroxyphenyl)prop-2-enoate	C15H18O9	4.18693	341.089	neg	M-H				61.4				0	0	60475.9	0
6.27_405.2255m/z	swainsonine	C8H15NO3	6.27385	405.225	neg	2M+Hac-H	51683	FXUAIOOAOAVCGD-WCTZXXKLSA-N	C1C[C@H]([C@@H]2[C@@H]([C@@H](CN2C1)O)O)O	61.2	Organoheterocyclic compounds	Indolizidines		0	26820.3	0	22171.1
0.41_141.0196m/z	Kojic acid	C6H6O4	0.41405	141.02	neg	M-H				61.2				3245.93	6640.25	2898.61	5923.07
5.02_217.0510m/z	Ethyl coumarin-3-carboxylate	C12H10O4	5.01838	217.051	neg	M-H	15800	XKHPEMKBJGUYCM-UHFFFAOYSA-N	CCOC(=O)C1=CC2=CC=CC=C2OC1=O	61.1	Phenylpropanoids and polyketides	Coumarins and derivatives		30441.4	3796.45	1010.09	2256.26
8.00_343.0470m/z	Aflatoxin P1	C16H10O6	7.9969	343.047	neg	M+FA-H	5484726	NRCXNPKDOMYPPJ-HYORBCNSSA-N	C1CC(=O)C2=C1C3=C(C4=C(C=C3O)O[C@@H]5[C@H]4C=CO5)OC2=O	61.1	Phenylpropanoids and polyketides	Coumarins and derivatives	Furanocoumarins	20802.1	576.229	283.901	1211.63
10.94_293.2124m/z	9(S)-HOTrE	C18H30O3	10.9377	293.212	neg	M-H	6439873	RIGGEAZDTKMXSI-MEBVTJQTSA-N	CC/C=C\C/C=C\C=C\[C@H](CCCCCCCC(=O)O)O	61	Lipids and lipid-like molecules	Fatty Acyls	Lineolic acids and derivatives	14575.4	22725.5	1.50712e+06	76318.4
10.02_312.2305n	13-Hydroperoxy-(9Z,11E)-octadecadienoic acid	C18H32O4	10.019	311.223	neg	M-H, M+Cl	5353275	JDSRHVWSAMTSSN-KDFHGORWSA-N	CCCCCC(/C=C/C=C/CCCCCCCC(=O)O)OO	60.9	Lipids and lipid-like molecules	Fatty Acyls	Lineolic acids and derivatives	10723.1	11225	204500	17202.4
1.92_326.1113m/z	2'-O-Methyladenosine	C11H15N5O4	1.92035	326.111	neg	M+FA-H	102213	FPUGCISOLXNPPC-IOSLPCCCSA-N	CO[C@@H]1[C@@H]([C@H](O[C@H]1N2C=NC3=C(N=CN=C32)N)CO)O	60.9	Nucleosides, nucleotides, and analogues	Purine nucleosides		0	0	160781	0
0.83_383.0841m/z	2-O-alpha-D-Glucopyranosyl-L-ascorbic acid	C12H18O11	0.827133	383.084	neg	M+FA-H	54693473	MLSJBGYKDYSOAE-DCWMUDTNSA-N	C([C@@H]1[C@H]([C@@H]([C@H]([C@H](O1)OC2=C([C@H](OC2=O)[C@H](CO)O)O)O)O)O)O	60.7	Lipids and lipid-like molecules	Fatty Acyls	Fatty acyl glycosides	2252.85	65969.4	0	0
8.66_241.1448m/z	trans-2-Tridecene-1,13-dioic acid	C13H22O4	8.66437	241.145	neg	M-H	23091819	QMTCVGUNYZWEJH-CSKARUKUSA-N	C(CCCC/C=C/C(=O)O)CCCCC(=O)O	60.5	Lipids and lipid-like molecules	Fatty Acyls	Fatty acids and conjugates	435.393	1406.77	50627.9	4485.39
1.85_153.0325m/z	cis-1,2-Dihydroxycyclohexane	C6H12O2	1.84687	153.033	neg	M+K-2H	92903	PFURGBBHAOXLIO-OLQVQODUSA-N	C1CC[C@@H]([C@@H](C1)O)O	60.4	Organic oxygen compounds	Organooxygen compounds	Alcohols and polyols	4.56456e+06	5.01139e+06	4618.65	4.61052e+06
5.61_261.1344m/z	Homononactinic acid	C11H20O4	5.61025	261.134	neg	M+FA-H	10889304	HTCUURQJNZBKIA-JLIMGVALSA-N	CC[C@H](C[C@H]1CC[C@H](O1)[C@H](C)C(=O)O)O	60.4	Organoheterocyclic compounds	Oxolanes		191.308	2534.47	27749.8	2523.83
0.79_180.0639n	theophylline	C7H8N4O2	0.787517	179.057	neg	M-H, 2M-H, M-H2O-H	2153	ZFXYFBGIUFBOJW-UHFFFAOYSA-N	CN1C2=C(C(=O)N(C1=O)C)NC=N2	60.4	Organoheterocyclic compounds	Imidazopyrimidines	Purines and purine derivatives	931421	5.85259e+06	840000	8.1616e+06
5.71_291.1451m/z	3-Hydroxydodecanedioic acid	C12H22O5	5.70992	291.145	neg	M+FA-H	16663321	FYVQCLGZFXHEGL-UHFFFAOYSA-N	C(CCCCC(=O)O)CCCC(CC(=O)O)O	60.3	Organic acids and derivatives	Hydroxy acids and derivatives	Medium-chain hydroxy acids and derivatives	512.593	21104.8	0	5044.48
1.04_75.0089m/z	Peracetic acid	C2H4O3	1.04313	75.0089	neg	M-H				60.2				3.73862e+06	248665	62953.5	161104
0.80_401.1313m/z	Galactopinitol B	C13H24O11	0.797333	401.131	neg	M+FA-H	101926786	WFSVEMFCPALUBB-DVLBVPSGSA-N	CO[C@@H]1[C@H]([C@H]([C@@H]([C@@H]([C@H]1O)O[C@H]2[C@@H]([C@H]([C@H]([C@H](O2)CO)O)O)O)O)O)O	60.2	Organic oxygen compounds	Organooxygen compounds	Carbohydrates and carbohydrate conjugates	113387	1.25095e+06	1.18301e+06	741679
6.69_233.0460m/z	2-Methoxynaphthoquinone	C11H8O3	6.68702	233.046	neg	M+FA-H	16871	OBGBGHKYJAOXRR-UHFFFAOYSA-N	COC1=CC(=O)C2=CC=CC=C2C1=O	60	Benzenoids	Naphthalenes	Naphthoquinones	668075	5299.83	2664.76	1509.87
0.76_383.1205m/z	D-1,5-Anhydrofructose	C6H10O5	0.757683	383.121	neg	2M+Hac-H	14299935	OCLOLUFOLJIQDC-UHFFFAOYSA-N	C1C(=O)C(C(C(O1)CO)O)O	59.8	Organoheterocyclic compounds	Oxanes		100511	16790.7	0	2786.08
6.60_538.1112n	Melitric acid A	C27H22O12	6.59817	537.104	neg	M-2H, M-H				59.8				108339	2208.58	628.442	553.656
6.61_319.1770m/z	3-Hydroxytetradecanedioic acid	C14H26O5	6.6113	319.177	neg	M+FA-H	20848956	CEDZIURHISELSQ-UHFFFAOYSA-N	C(CCCCCC(=O)O)CCCCC(CC(=O)O)O	59.7	Lipids and lipid-like molecules	Fatty Acyls	Fatty acids and conjugates	0	0	20650	0
5.82_211.0980m/z	Hydroxypestalotin	C11H18O5	5.82153	211.098	neg	M-H2O-H	12245839	YLHOHANRUSKHKO-IQJOONFLSA-N	CCC[C@@H]([C@H]([C@H]1CC(=CC(=O)O1)OC)O)O	59.4	Organoheterocyclic compounds	Pyrans	Pyranones and derivatives	95418.3	3668.81	5952.64	982.147
10.81_278.1886n	7,15-Dihydroxypodocarp-8(14)-en-13-one	C17H26O3	10.8104	277.181	neg	M-H, M+Na-2H	71307291	ZAYXCFZRTAJXMC-LMCYLSQRSA-N	C[C@@]1(CCC[C@]2(C1CC(C3=CC(=O)CC[C@@H]32)O)C)CO	59	Benzenoids	Phenanthrenes and derivatives	Hydrophenanthrenes	45288.6	74315	539891	82937.5
5.12_323.1257m/z	N1-(alpha-D-ribosyl)-5,6-dimethyl-benzimidazole	C14H18N2O4	5.119	323.126	neg	M+FA-H				59				3111.2	0	34156.2	0
11.45_296.2358n	13(S)-HODE	C18H32O3	11.4531	295.229	neg	M-H, 2M-H, M+Cl				58.7				52026.3	47923.4	2.89556e+06	124214
5.74_314.1150m/z	gamma-Glutamyltryptophan	C16H19N3O5	5.73577	314.115	neg	M-H2O-H	3038501	CATMPQFFVNKDEY-AAEUAGOBSA-N	C1=CC=C2C(=C1)C(=CN2)C[C@@H](C(=O)O)NC(=O)CC[C@@H](C(=O)O)N	58.7	Organic acids and derivatives	Carboxylic acids and derivatives	Amino acids, peptides, and analogues	0	10598.2	0	10754.8
6.75_449.1463m/z	Nitidanin	C21H24O8	6.75052	449.146	neg	M+FA-H	10501396	AZTAGXIJLPKJOR-SRXMEYSWSA-N	COC1=CC(=CC2=C1O[C@@H]([C@H](O2)C3=CC(=C(C(=C3)OC)O)OC)CO)/C=C/CO	58.7	Organoheterocyclic compounds	Benzodioxanes	Phenylbenzodioxanes	29253.9	2182.45	62049.7	1831.69
10.60_315.2550m/z	Methyl hexadecanoate	C17H34O2	10.598	315.255	neg	M+FA-H	8181	FLIACVVOZYBSBS-UHFFFAOYSA-N	CCCCCCCCCCCCCCCC(=O)OC	58.5	Lipids and lipid-like molecules	Fatty Acyls	Fatty acid esters	15654.7	11388.3	16356.6	16680.6
6.03_226.0483n	3-(3,4-dihydroxy-5-methoxyphenyl)oxirane-2-carboxylic acid	C10H10O6	6.0349	207.03	neg	M-H2O-H, M-H	3478434	CUHUYVNPCQYRLG-UHFFFAOYSA-N	COC1=CC=C(C=C1)C2C(O2)C(=O)O	58.5	Benzenoids	Phenol ethers	Anisoles	11392.7	6609.99	24747.8	17922.4
7.25_223.0616m/z	3-Ethylthiophene	C6H8S	7.252	223.062	neg	2M-H				58.5				93221.6	29691.8	13459.3	84341.2
14.60_311.1691m/z	N-Undecylbenzenesulfonic acid	C17H28O3S	14.6001	311.169	neg	M-H	38222	UCDCOJNNUVYFKJ-UHFFFAOYSA-N	CCCCCCCCCCCC1=CC=C(C=C1)S(=O)(=O)O	58.4	Benzenoids	Benzene and substituted derivatives	Benzenesulfonic acids and derivatives	5.80556e+06	6.73441e+06	8.97109e+06	8.82612e+06
5.96_363.1095m/z	2-[3-hydroxy-4-(methoxymethyl)phenyl]-3,4-dihydro-2H-1-benzopyran-3,5,7-triol	C17H18O6	5.96082	363.109	neg	M+FA-H				58.4				33224.4	1003.87	0	3032.13
5.77_575.1432m/z	Formononetin 7-(6''-methylmalonylglucoside)	C26H26O12	5.7728	575.143	neg	M+FA-H				58.3				51146.7	645.417	0	0
4.51_355.1044m/z	Swertiamarin	C16H22O10	4.51463	355.104	neg	M-H2O-H	442435	HEYZWPRKKUGDCR-QBXMEVCASA-N	C=C[C@H]1[C@@H](OC=C2[C@]1(CCOC2=O)O)O[C@H]3[C@@H]([C@H]([C@@H]([C@H](O3)CO)O)O)O	58.3	Organic oxygen compounds	Organooxygen compounds	Carbohydrates and carbohydrate conjugates	0	390.41	0	391.036
1.69_189.0674m/z	2-Aminoquinoline	C9H8N2	1.68983	189.067	neg	M+FA-H				58.2				0	0	108947	3491.02
2.50_265.0832m/z	p-Hydroxyl-ethotoin	C11H12N2O3	2.49562	265.083	neg	M+FA-H	71396710	UUBDNHDPPHJUHB-UHFFFAOYSA-N	CCN1C(=O)C(NC1=O)C2=CC=C(C=C2)O	58.2	Organoheterocyclic compounds	Azolidines	Imidazolidines	0	0	11178.9	0
9.89_291.0665m/z	Polyporic acid	C18H12O4	9.89387	291.066	neg	M-H				58.2				24171.2	3805.16	6326.24	1889.5
9.37_317.1766m/z	17a-Estradiol	C18H24O2	9.36893	317.177	neg	M+FA-H	68570	VOXZDWNPVJITMN-SFFUCWETSA-N	C[C@]12CC[C@H]3[C@H]([C@@H]1CC[C@H]2O)CCC4=C3C=CC(=C4)O	58.1	Lipids and lipid-like molecules	Steroids and steroid derivatives	Estrane steroids	8133.73	6160.16	12608.8	6230.87
5.68_150.0326m/z	L-Proline	C5H9NO2	5.68417	150.033	neg	M+Cl				58				2322.78	435.794	16186.2	2024.87
7.48_401.1254m/z	Brosimacutin G	C20H20O6	7.48022	401.125	neg	M+FA-H	11325738	KJPLNWFZFTXFPY-FQMXMGHCSA-N	CC(C)([C@@H]1[C@H](C2=C(O1)C=CC(=C2O)C(=O)/C=C/C3=CC=C(C=C3)O)O)O	58	Phenylpropanoids and polyketides	Linear 1,3-diarylpropanoids	Chalcones and dihydrochalcones	934.59	0	24307.7	2446.74
7.01_327.1246m/z	Alectrol	C19H22O6	7.0125	327.125	neg	M-H2O-H	5281353	FIKOOQXJBAJJSE-YTQTXRHFSA-N	CC1=C[C@@H](OC1=O)O/C=C/2\[C@H]3C=C4CCCC(C4([C@H]3OC2=O)O)(C)C	57.9	Organoheterocyclic compounds	Lactones	Gamma butyrolactones	5861.24	1580.57	14672	2690.82
4.64_469.1478m/z	Secologanin dimethyl acetal	C19H30O11	4.64167	469.148	neg	M+Cl	157140	HUVIXLWRQSMCLN-PXRCHJMLSA-N	COC(C[C@H]1[C@H]([C@@H](OC=C1C(=O)OC)O[C@H]2[C@@H]([C@H]([C@@H]([C@H](O2)CO)O)O)O)C=C)OC	57.7	Lipids and lipid-like molecules	Prenol lipids	Terpene glycosides	0	0	17064.6	0
6.94_391.1045m/z	2-(3,4-dihydroxyphenyl)-2-hydroxyethyl 3-(4-hydroxy-3-methoxyphenyl)prop-2-enoate	C18H18O7	6.93625	391.104	neg	M+FA-H				57.6				238434	0	0	0
5.18_419.1356m/z	Anonamine	C19H28NO7+	5.18203	419.136	neg	M+K-2H	6441178	SFTHPGHXDNRVHD-FLRXXRQUSA-N	C[C@@H]1C/C(=C\CO)/C(=O)O[C@@H]2CC[N+]3([C@@]2(C(=CC3)COC(=O)[C@]1(C)O)O)C	57.2	Alkaloids and derivatives			0	0	21458	0
8.79_341.1039m/z	Demethoxyegonol	C18H16O4	8.79137	341.104	neg	M+FA-H	10402297	YQEPMZLWYOAQNI-UHFFFAOYSA-N	C1OC2=C(O1)C=C(C=C2)C3=CC4=C(O3)C=CC(=C4)CCCO	57.2	Phenylpropanoids and polyketides	2-arylbenzofuran flavonoids		0	0	18466	13533.4
6.89_352.1432n	Moschamine	C20H20N2O4	6.88563	351.136	neg	M-H, M+Cl	5969616	WGHKJYWENWLOMY-XVNBXDOJSA-N	COC1=C(C=CC(=C1)/C=C/C(=O)NCCC2=CNC3=C2C=C(C=C3)O)O	57.1	Organoheterocyclic compounds	Indoles and derivatives	Tryptamines and derivatives	3174.76	560.856	79847.7	9233.93
4.82_206.0463m/z	3-Formyl-6-hydroxyindole	C9H7NO2	4.81707	206.046	neg	M+FA-H	10103438	FAFBOYSDWMRMLQ-UHFFFAOYSA-N	C1=CC2=C(C=C1O)NC=C2C=O	57	Organoheterocyclic compounds	Indoles and derivatives	Hydroxyindoles	299.864	10820.2	6807.53	18669.6
6.32_449.0736m/z	Urolithin A-8-O-glucuronide	C19H16O10	6.32287	449.074	neg	M+FA-H				57				197382	465.053	0	0
4.21_291.0988m/z	Glu Tyr	C14H18N2O6	4.21223	291.099	neg	M-H2O-H	515717	YSWHPLCDIMUKFE-QWRGUYRKSA-N	C1=CC(=CC=C1C[C@@H](C(=O)O)NC(=O)[C@H](CCC(=O)O)N)O	57	Organic acids and derivatives	Carboxylic acids and derivatives	Amino acids, peptides, and analogues	0	6837.16	0	11952.7
1.15_767.2568m/z	Kansuinine B	C38H42O14	1.14833	767.257	neg	M+FA-H	442050	JFOILMZFESGPDU-GXRLDEOZSA-N	C[C@H]1[C@H]2[C@@H](O2)C(C(=O)[C@@H]([C@H](C(=C)[C@@H]([C@H]3[C@H]([C@]([C@@H]([C@@]3(C1=O)OC(=O)C)O)(C)O)OC(=O)C)OC(=O)C4=CC=CC=C4)OC(=O)C5=CC=CC=C5)O)(C)C	56.7	Organic acids and derivatives	Carboxylic acids and derivatives	Tetracarboxylic acids and derivatives	2012.23	243789	0	819831
6.14_231.0304m/z	4-Hydroxy-8-methoxy-2H-furo[2,3-h]-1-benzopyran-2-one	C12H8O5	6.13517	231.03	neg	M-H	85748760	CJAULYJMFDTPBE-UHFFFAOYSA-N	COC1=CC2=C(O1)C=CC3=C2OC(=O)C=C3O	56.7	Phenylpropanoids and polyketides	Coumarins and derivatives	Furanocoumarins	35336.7	0	0	0
4.55_265.0719m/z	Eugenitin	C12H12O4	4.5534	265.072	neg	M+FA-H	3083581	RGTSAUBIQAKKLC-UHFFFAOYSA-N	CC1=CC(=O)C2=C(C(=C(C=C2O1)OC)C)O	56.6	Organoheterocyclic compounds	Benzopyrans	1-benzopyrans	0	647.424	0	26127.3
8.58_579.1536m/z	3''-p-Coumaroylprunin	C30H28O12	8.57545	579.154	neg	M-H	44715485	BEHIONSZUBFJLA-JKIGBVBOSA-N	C1C(OC2=CC(=CC(=C2C1=O)O)O[C@H]3[C@@H]([C@H]([C@@H]([C@H](O3)CO)O)OC(=O)/C=C/C4=CC=C(C=C4)O)O)C5=CC=C(C=C5)O	56.4	Phenylpropanoids and polyketides	Flavonoids	Flavonoid glycosides	64191.5	0	0	0
6.64_319.0832m/z	6-[(E)-2-(3-hydroxy-4-methoxyphenyl)ethenyl]-4-methoxy-2H-pyran-2-one	C15H14O5	6.6368	319.083	neg	M+FA-H				56.3				12499.4	0	0	0
0.88_89.9954n	Oxalic acid	C2H2O4	0.880733	88.9882	neg	M-H, 2M-H	971	MUBZPKHOEPUJKR-UHFFFAOYSA-N	C(=O)(C(=O)O)O	56.3	Organic acids and derivatives	Carboxylic acids and derivatives	Dicarboxylic acids and derivatives	8.43699e+07	6.52973e+06	1.79675e+06	1.30806e+06
14.79_837.4963m/z	PG(18:3(9Z,12Z,15Z)/20:4(5Z,8Z,11Z,14Z))	C44H73O10P	14.7944	837.496	neg	M+FA-H				56.2				29964.6	316566	16996.8	21158.3
1.82_183.0304m/z	Ethyl aconitate	C8H10O6	1.82247	183.03	neg	M-H2O-H				56.1				12341.9	10602.9	22633.8	7533.68
7.33_417.0837m/z	2-(3,4-dihydroxyphenyl)-5,7-dihydroxy-8-(3,4,5-trihydroxyoxan-2-yl)-4H-chromen-4-one	C20H18O10	7.32652	417.084	neg	M-H				56.1				35236.6	11907.1	9082.85	41955.9
10.26_295.1920m/z	13,14,15,16-Tetranor-8(17)-labden-12-oic acid	C16H26O2	10.2588	295.192	neg	M+FA-H	14380023	CDFOVPVYHVWCGP-UHFFFAOYSA-N	CC1(CCCC2(C1CCC(=C)C2CC(=O)O)C)C	56	Organic acids and derivatives	Carboxylic acids and derivatives	Carboxylic acids	355.336	0	11040	2550.13
4.10_321.0735m/z	Phomaligol A	C14H20O6	4.09793	321.074	neg	M+K-2H	15265874	DWJRXSZPSOQYDZ-HQOPCJQPSA-N	CCC(C)C(=O)O[C@@]1(C(=O)C=C([C@@](C1=O)(C)O)OC)C	55.9	Organic oxygen compounds	Organooxygen compounds	Carbonyl compounds	0	0	79929.6	0
7.58_477.1565m/z	Virenomycin M	C27H28O9	7.57995	477.156	neg	M-H2O-H	174343	BJPYMDSMDBCKEP-UHFFFAOYSA-N	CC1C(C(C(C(O1)C2=C3C(=C(C=C2)O)C(=CC4=C3OC(=O)C5=C4C(=CC(=C5)C)OC)OC)O)(C)O)O	55.7	Organic oxygen compounds	Organooxygen compounds	Carbohydrates and carbohydrate conjugates	32139.3	3208.67	0	0
5.62_241.0720m/z	1-(2,4,5-Trihydroxyphenyl)-1-butanone	C10H12O4	5.6229	241.072	neg	M+FA-H				55.7				3828.77	6039.59	0	16229.8
7.53_455.0992m/z	Cuneatin 7-glucoside	C23H22O11	7.52987	455.099	neg	M-H2O-H				55.7				114164	0	0	0
4.64_308.0781m/z	N-Feruloylaspartic acid	C14H15NO7	4.64167	308.078	neg	M-H				55.5				0	0	20377.3	0
5.45_292.0221n	Brevifolincarboxylic acid	C13H8O8	5.44865	273.004	neg	M-H2O-H, M-H	9838995	JFJWMFPFMLRLMI-UHFFFAOYSA-N	C1C(C2=C(C1=O)OC(=O)C3=CC(=C(C(=C32)O)O)O)C(=O)O	55.4	Phenylpropanoids and polyketides	Isocoumarins and derivatives		145194	7532.63	3412.77	1389.8
4.64_344.1838m/z	N-Jasmonoylisoleucine	C18H29NO4	4.64167	344.184	neg	M+Na-2H	5497150	IBZYPBGPOGJMBF-QRHMYKSGSA-N	CC/C=C\C[C@@H]1[C@H](CCC1=O)CC(=O)N[C@@H]([C@@H](C)CC)C(=O)O	55.4	Organic acids and derivatives	Carboxylic acids and derivatives	Amino acids, peptides, and analogues	0	14571.7	0	7279.38
5.74_259.1187m/z	Pestalotin	C11H18O4	5.73577	259.119	neg	M+FA-H	182201	YFIMUDXPJZVJJO-UWVGGRQHSA-N	CCCC[C@@H]([C@@H]1CC(=CC(=O)O1)OC)O	55.3	Organoheterocyclic compounds	Pyrans	Pyranones and derivatives	168.958	985.701	21561.6	244.993
1.62_182.0463m/z	4-Pyridoxic acid	C8H9NO4	1.61623	182.046	neg	M-H	6723	HXACOUQIXZGNBF-UHFFFAOYSA-N	CC1=NC=C(C(=C1O)C(=O)O)CO	55.3	Organoheterocyclic compounds	Pyridines and derivatives	Pyridinecarboxylic acids and derivatives	2972.99	300.331	8458.92	217.394
0.59_564.0778n	DTDP-alpha-D-glucose(2-)	C16H26N2O16P2	0.590117	585.052	neg	M+Na-2H, M+K-2H	79025	WQZGKKKJIJFFOK-DVKNGEFBSA-N	C([C@@H]1[C@H]([C@@H]([C@H]([C@H](O1)O)O)O)O)O	55	Organic oxygen compounds	Organooxygen compounds	Carbohydrates and carbohydrate conjugates	674825	2357.88	0	118.939
5.93_417.1201m/z	Catechin 3-rhamnoside	C21H24O10	5.93435	417.12	neg	M-H2O-H	21626704	KYLFHITXPCWYAL-HLBABLIESA-N	C[C@H]1[C@@H]([C@H]([C@H]([C@@H](O1)O[C@H]2CC3=C(C=C(C=C3O[C@@H]2C4=CC(=C(C=C4)O)O)O)O)O)O)O	55	Phenylpropanoids and polyketides	Flavonoids	Flavonoid glycosides	91174.9	2267.53	3600.49	1064.68
7.19_293.0935m/z	Dictyoquinazol A	C17H16N2O4	7.18903	293.093	neg	M-H2O-H				54.9				450.507	0	16408.5	0
6.46_315.0151m/z	3-Methyl ellagic acid	C15H8O8	6.46253	315.015	neg	M-H	13915428	FAARLWTXUUQFSN-UHFFFAOYSA-N	COC1=C(C=C2C3=C1OC(=O)C4=CC(=C(C(=C43)OC2=O)O)O)O	54.9	Phenylpropanoids and polyketides	Tannins	Hydrolyzable tannins	40968.7	2476.6	1759.6	979.231
5.57_225.0772m/z	Ethyl 4-methoxysalicylate	C10H12O3	5.57117	225.077	neg	M+FA-H	13013010	XTIRHTFASWVFJU-UHFFFAOYSA-N	CCOC(=O)C1=C(C=C(C=C1)OC)O	54.8	Benzenoids	Benzene and substituted derivatives	Benzoic acids and derivatives	15552.6	5042.27	79844.1	5039.67
5.53_448.1230n	4-Hydroxy-5-(3',4',5'-trihydroxyphenyl)-valeric acid-O-methyl-O-glucuronide	C18H24O13	5.53398	429.105	neg	M-H2O-H, M+Cl	124202071	KRZPFELARLSRKT-UHFFFAOYSA-N	C1=CC(=C(C=C1CC(CCC(=O)OCOC2C(C(C(C(O2)C(O)O)O)O)O)O)O)O	54.6	Organic oxygen compounds	Organooxygen compounds	Carbohydrates and carbohydrate conjugates	789297	19766.2	7756.65	710.364
7.64_245.1397m/z	(S)-9-Hydroxy-10-undecenoic acid	C11H20O3	7.6433	245.14	neg	M+FA-H	73242170	CJUFNYIRKDOQMC-SNVBAGLBSA-N	C=C[C@H](CCCCCCCC(=O)O)O	54.4	Organic acids and derivatives	Hydroxy acids and derivatives	Medium-chain hydroxy acids and derivatives	1539.2	0	313208	0
6.39_415.1409m/z	Xanthohumol B	C21H22O6	6.38667	415.141	neg	M+FA-H	9799506	GUQGMEWOCKDLDE-RMKNXTFCSA-N	CC1(C(CC2=C(C(=C(C=C2O1)OC)C(=O)/C=C/C3=CC=C(C=C3)O)O)O)C	54.3	Phenylpropanoids and polyketides	Linear 1,3-diarylpropanoids	Chalcones and dihydrochalcones	51658.8	11751.3	0	3281.38
7.29_474.1537n	(+)-Puerol B 2''-O-glucoside	C24H26O10	7.28918	473.146	neg	M-H, M+Cl	102004504	IOVBNDMOPKKFCH-ZAUXWKBESA-N	COC1=CC(=C(C=C1)C2=CC(=O)O[C@@H]2CC3=CC=C(C=C3)O)O[C@H]4[C@@H]([C@H]([C@@H]([C@H](O4)CO)O)O)O	54.3	Organic oxygen compounds	Organooxygen compounds	Carbohydrates and carbohydrate conjugates	211097	1867.05	0	7985.16
4.92_278.0675m/z	Caffeoyl aspartic acid	C13H13NO6	4.9177	278.068	neg	M-H				54.3				115716	0	0	276.704
6.57_433.1516m/z	Edulisin III	C21H24O7	6.57373	433.152	neg	M+FA-H				54.1				0	0	31368.5	6539.18
5.50_195.0668m/z	Acetosyringone	C10H12O4	5.49875	195.067	neg	M-H	17198	OJOBTAOGJIWAGB-UHFFFAOYSA-N	CC(=O)C1=CC(=C(C(=C1)OC)O)OC	54	Organic oxygen compounds	Organooxygen compounds	Carbonyl compounds	49039.9	11373.3	34482.7	10361.4
4.63_209.0461m/z	5-Hydroxyferulate	C10H10O5	4.62817	209.046	neg	M-H	54740354	YFXWTVLDSKSYLW-NSCUHMNNSA-M	COC1=CC(=CC(=C1[O-])O)/C=C/C(=O)O	54	Phenylpropanoids and polyketides	Cinnamic acids and derivatives	Hydroxycinnamic acids and derivatives	9792.66	3033.54	1380.03	4225.51
4.63_265.0356m/z	Purpurogallin	C11H8O5	4.62817	265.036	neg	M+FA-H	135403797	WDGFFVCWBZVLCE-UHFFFAOYSA-N	C1=CC2=CC(=C(C(=C2C(=O)C(=C1)O)O)O)O	53.8	Hydrocarbon derivatives	Tropones	Tropolones	0	0	18770.4	0
11.14_277.1450m/z	(2Z)-2-[(2-hydroxyphenyl)methylidene]octanal	C15H20O2	11.1397	277.145	neg	M+FA-H				53.8				58665.9	110037	93310.8	145709
5.22_187.1213n	8-Amino-7-oxononanoic acid	C9H17NO3	5.22108	186.114	neg	M-H, M+Cl	173	GUAHPAJOXVYFON-UHFFFAOYSA-N	CC(C(=O)CCCCCC(=O)O)N	53.7	Lipids and lipid-like molecules	Fatty Acyls	Fatty acids and conjugates	1051.44	3015.88	195558	3318.31
7.72_593.1689m/z	4'-O-(6-O-Feruloylglucopyranosyl)phloretin	C31H32O13	7.71845	593.169	neg	M-H2O-H	146116081	XPDRWWOVCUXRNF-GCIXMLDOSA-N	COC1=C(C=CC(=C1)/C=C/C(=O)OC[C@@H]2[C@H]([C@@H]([C@H]([C@@H](O2)OC3=CC(=C(C(=C3)O)C(=O)CCC4=CC=C(C=C4)O)O)O)O)O)O	53.7	Phenylpropanoids and polyketides	Flavonoids	Flavonoid glycosides	0	0	38752.9	46693.4
9.32_287.1866m/z	6-Ketomyristic acid	C14H26O3	9.31745	287.187	neg	M+FA-H	454063	FCMLVMXRWKFUTG-UHFFFAOYSA-N	CCCCCCCCC(=O)CCCCC(=O)O	53.6	Lipids and lipid-like molecules	Fatty Acyls	Fatty acids and conjugates	0	0	13771.5	0
6.26_231.1241m/z	(E)-10-Hydroxy-8-decenoic acid	C10H18O3	6.25962	231.124	neg	M+FA-H	5312741	RCXJFGCVOBRFEH-FNORWQNLSA-N	C(CCCC(=O)O)CC/C=C/CO	53.5	Organic acids and derivatives	Hydroxy acids and derivatives	Medium-chain hydroxy acids and derivatives	11197.2	24508.4	241120	14484
11.79_293.2125m/z	Sterol	C17H28O	11.7931	293.212	neg	M+FA-H	1107	FPXSXMFOYWRHDX-UHFFFAOYSA-N	C1CC2CCC3C4CCC(CC4CCC3C2C1)O	53.4	Lipids and lipid-like molecules	Steroids and steroid derivatives	Hydroxysteroids	115781	45952.2	560588	47620.2
4.99_721.2268m/z	Citbrasine	C17H17NO6	4.99373	721.227	neg	2M+Hac-H				53.4				0	356112	0.00126399	5.02974e+06
11.45_579.1323m/z	Sciadopitysin	C33H24O10	11.4531	579.132	neg	M-H				53.3				21410.5	15405.5	45903.1	19933
5.97_263.0563m/z	Piperic acid	C12H10O4	5.97208	263.056	neg	M+FA-H	5370536	RHBGITBPARBDPH-ZPUQHVIOSA-N	C1OC2=C(O1)C=C(C=C2)/C=C/C=C/C(=O)O	53.1	Organoheterocyclic compounds	Benzodioxoles		47367.2	458.039	206.673	0
9.38_309.1713m/z	Brefeldin-C	C16H24O3	9.38182	309.171	neg	M+FA-H	124544298	DDFOHHVPBOQQDW-FUDLCGMLSA-N	C[C@@H]1CCC/C=C/[C@H]2CCC[C@@H]2[C@H](/C=C/C(=O)O1)O	52.8	Phenylpropanoids and polyketides	Macrolides and analogues		9768.31	16449	865.481	5020.63
4.21_287.0776m/z	Starch acetate	C12H18O9	4.21223	287.078	neg	M-H2O-H				52.7				22703.2	0	0	0
8.25_221.0823m/z	2,2-dimethyl-2H-chromen-5-ol	C11H12O2	8.24728	221.082	neg	M+FA-H	14792433	SHBLUYDDXWADNS-UHFFFAOYSA-N	CC1(C=CC2=C(C=CC=C2O1)O)C	52.6	Organoheterocyclic compounds	Benzopyrans	1-benzopyrans	23777.1	39625.6	32683.8	54970
6.16_221.0460m/z	Erythrocentaurin	C10H8O3	6.16052	221.046	neg	M+FA-H	191120	TUADBWMDDLWUME-UHFFFAOYSA-N	C1COC(=O)C2=CC=CC(=C21)C=O	52.5	Organoheterocyclic compounds	Benzopyrans	2-benzopyrans	14379.9	11088.2	12108.3	47398.9
4.77_188.0359m/z	Kynurenic acid	C10H7NO3	4.76742	188.036	neg	M-H	3845	HCZHHEIFKROPDY-UHFFFAOYSA-N	C1=CC=C2C(=C1)C(=O)C=C(N2)C(=O)O	52.5	Organoheterocyclic compounds	Quinolines and derivatives	Quinoline carboxylic acids	2291.5	873.033	12046.1	1041.66
4.35_293.1508m/z	Tyr Leu	C15H22N2O4	4.3504	293.151	neg	M-H	4466134	AUEJLPRZGVVDNU-UHFFFAOYSA-N	CC(C)CC(C(=O)O)NC(=O)C(CC1=CC=C(C=C1)O)N	52.5	Organic acids and derivatives	Carboxylic acids and derivatives	Amino acids, peptides, and analogues	0	15948.3	0.424636	21785.2
8.46_270.0893n	Medicarpin	C16H14O4	8.4618	269.082	neg	M-H, M+Cl	336327	NSRJSISNDPOJOP-BBRMVZONSA-N	COC1=CC2=C(C=C1)[C@@H]3COC4=C([C@@H]3O2)C=CC(=C4)O	52.3	Phenylpropanoids and polyketides	Isoflavonoids	Furanoisoflavonoids	44462	0	111.967	0
1.14_290.0883m/z	N-Fructosyl pyroglutamate	C11H17NO8	1.13718	290.088	neg	M-H	139292107	VMOJEEZNLOLYBG-UHFFFAOYSA-N	C1CC(=O)N(C1C(=O)O)CC2(C(C(C(O2)CO)O)O)O	52.2	Organic acids and derivatives	Carboxylic acids and derivatives	Amino acids, peptides, and analogues	49603.4	1183.61	0	4379.56
7.64_539.1194m/z	6-Caffeoylsucrose	C21H28O14	7.6433	539.119	neg	M+Cl				52.2				2216.18	0	263939	886230
4.40_343.1045m/z	Catalpol	C15H22O10	4.40068	343.104	neg	M-H2O-H	91520	LHDWRKICQLTVDL-PZYDOOQISA-N	C1=CO[C@H]([C@H]2[C@@H]1[C@@H]([C@H]3[C@@]2(O3)CO)O)O[C@H]4[C@@H]([C@H]([C@@H]([C@H](O4)CO)O)O)O	52.1	Organic oxygen compounds	Organooxygen compounds	Carbohydrates and carbohydrate conjugates	11670.7	65.6936	26491.6	0
0.78_737.2061m/z	5-Hydroxy-6-methoxyindole glucuronide	C15H17NO8	0.777167	737.206	neg	2M+Hac-H	196512	MLRMPLSCFCMXGJ-DKBOKBLXSA-N	COC1=C(C=C2C=CNC2=C1)O[C@H]3[C@@H]([C@H]([C@@H]([C@H](O3)C(=O)O)O)O)O	52	Organic oxygen compounds	Organooxygen compounds	Carbohydrates and carbohydrate conjugates	685688	7436.09	0	8513.16
9.74_277.1814m/z	1-(2,6,6-Trimethyl-2-cyclohexen-1-yl)-1,6-heptadien-3-one	C16H24O	9.74332	277.181	neg	M+FA-H	5365976	FXCYGAGBPZQRJE-ZHACJKMWSA-N	CC1=CCCC(C1/C=C/C(=O)CCC=C)(C)C	52	Lipids and lipid-like molecules	Prenol lipids	Sesquiterpenoids	0	0	32313.4	0
6.92_703.2113m/z	5''-O-Syringoylkelampayoside A	C29H38O17	6.9238	703.211	neg	M+FA-H	24766792	JXFLXUHEPVEMKK-UTDQSPDHSA-N	COC1=CC(=CC(=C1O)OC)C(=O)OC[C@]2(CO[C@H]([C@@H]2O)OC[C@@H]3[C@H]([C@@H]([C@H]([C@@H](O3)OC4=CC(=C(C(=C4)OC)OC)OC)O)O)O)O	51.9	Phenylpropanoids and polyketides	Tannins	Hydrolyzable tannins	233482	18676	11744.4	150838
5.45_317.0312m/z	2-(2,4-dihydroxyphenyl)-3,5,6,7-tetrahydroxy-4H-chromen-4-one	C15H10O8	5.44865	317.031	neg	M-H	5281670	YXOLAZRVSSWPPT-UHFFFAOYSA-N	C1=CC(=C(C=C1O)O)C2=C(C(=O)C3=C(C=C(C=C3O2)O)O)O	51.9	Phenylpropanoids and polyketides	Flavonoids	Flavones	2209.66	84.5315	18659	383.014
0.80_499.0982m/z	1-Propenyl 1-(1-propenylthio)propyl disulfide	C9H16S3	0.797333	499.098	neg	2M+Hac-H				51.7				0	0	117189	0
7.03_355.0832m/z	Butyrolactone II	C19H16O7	7.02623	355.083	neg	M-H	10405953	AEKPZNDJHWFONI-LJQANCHMSA-N	COC(=O)[C@]1(C(=C(C(=O)O1)O)C2=CC=C(C=C2)O)CC3=CC=C(C=C3)O	51.7	Lipids and lipid-like molecules	Fatty Acyls	Fatty acid esters	7885.04	828.89	27968.8	38216.5
0.80_193.0359m/z	D-Galacturonic Acid	C6H10O7	0.797333	193.036	neg	M-H				51.7				15827.5	208664	0	638824
5.03_245.0096m/z	Purpurogallin carboxylic acid	C12H8O7	5.03143	245.01	neg	M-H2O-H	137628491	PJSKCCANFAFYHW-UHFFFAOYSA-N	C1=C2C=C(C=C(C(=O)C2=C(C(=C1O)O)O)O)C(=O)O	51.6	Hydrocarbon derivatives	Tropones	Tropolones	15537.7	0	356.689	0
8.08_230.1523n	Talaromycin A	C12H22O4	8.08432	211.134	neg	M-H2O-H, M-H	158564	VDWRKBZMQNPUOB-WISYIIOYSA-N	CC[C@@H]1CC[C@@]2(C[C@@H]([C@@H](CO2)CO)O)OC1	51.4	Organic oxygen compounds	Organooxygen compounds	Ethers	390.603	2023.53	13171.5	2143.7
5.28_325.0723m/z	Furano(2'',3'',7,6)-4'-hydroxyflavanone	C17H12O4	5.2849	325.072	neg	M+FA-H	134715107	ZPDVPPPMIRNLSA-INIZCTEOSA-N	C1[C@H](OC2=C(C1=O)C=C3C=COC3=C2)C4=CC=C(C=C4)O	51.4	Phenylpropanoids and polyketides	Flavonoids	Furanoflavonoids and dihydrofuranoflavonoids	0	0	42426.6	0
7.09_385.0939m/z	Pinocembrin diacetate	C19H16O6	7.08808	385.094	neg	M+FA-H	6546286	YZOMNXCYSIYMOX-INIZCTEOSA-N	CC(=O)OC1=CC2=C(C(=O)C[C@H](O2)C3=CC=CC=C3)C(=C1)OC(=O)C	51.4	Phenylpropanoids and polyketides	Flavonoids	Flavans	9030.65	2873.9	137881	882210
7.09_313.1087m/z	Epidanshenspiroketallactone	C17H16O3	7.08808	313.109	neg	M+FA-H	102004791	DNLNYCCHXAULQA-DYZYQPBXSA-N	C[C@H]1C[C@@]2(C3=C(C4=CC=CC(=C4C=C3)C)C(=O)O2)OC1	51.3	Organoheterocyclic compounds	Naphthofurans		33484.1	10635	1073.52	127175
7.83_215.1293m/z	p-Menth-8-ene-1,2-diol	C10H18O2	7.83188	215.129	neg	M+FA-H	94217	WKZWTZTZWGWEGE-UHFFFAOYSA-N	CC(=C)C1CCC(C(C1)O)(C)O	51.3	Lipids and lipid-like molecules	Prenol lipids	Monoterpenoids	22053.8	73272.5	12485.4	73414.4
8.62_341.1040m/z	3,4-Dihydro-2H-1-benzopyran-2-one	C9H8O2	8.62477	341.104	neg	2M+FA-H	660	VMUXSMXIQBNMGZ-UHFFFAOYSA-N	C1CC(=O)OC2=CC=CC=C21	51.2	Phenylpropanoids and polyketides	3,4-dihydrocoumarins		221.725	164.102	28705.4	3292.42
6.66_207.0667m/z	1-(2-Methoxy-3,4-methylenedioxyphenyl)-1-propanone	C11H12O4	6.6612	207.067	neg	M-H	129836737	QMCIDBYMJALLQD-UHFFFAOYSA-N	CCC(=O)C1=C(C2=C(C=C1)OCO2)OC	51.2	Organoheterocyclic compounds	Benzodioxoles		39268.7	18242.4	20494.4	66994.7
5.72_189.0562m/z	6,8-Dimethyl-4-hydroxycoumarin	C11H10O3	5.72313	189.056	neg	M-H	54710971	HVHIQQVTLCUBKA-UHFFFAOYSA-N	CC1=CC(=C2C(=C1)C(=CC(=O)O2)O)C	51	Phenylpropanoids and polyketides	Coumarins and derivatives	Hydroxycoumarins	7680.27	138.139	98.4708	241.271
7.10_241.1085m/z	Loliolide	C11H16O3	7.10032	241.109	neg	M+FA-H	100332	XEVQXKKKAVVSMW-WRWORJQWSA-N	C[C@@]12C[C@H](CC(C1=CC(=O)O2)(C)C)O	51	Organoheterocyclic compounds	Benzofurans		56718.5	82813.6	1145.15	56381.4
6.67_434.1227n	2-{[5,7-dihydroxy-2-(4-hydroxy-3-methoxyphenyl)-5H-chromen-3-yl]oxy}oxane-3,4,5-triol	C21H22O10	6.67485	433.115	neg	M-H, M+Cl				50.9				86103.8	0	1433.26	0
7.78_593.1322m/z	2''-O-trans-p-Coumaroylastragalin	C30H26O13	7.78217	593.132	neg	M-H				50.9				40213.5	0	0	748.176
5.40_589.1797m/z	Arbutin	C12H16O7	5.3982	589.18	neg	2M+FA-H	440936	BJRNKVDFDLYUGJ-RMPHRYRLSA-N	C1=CC(=CC=C1O)O[C@H]2[C@@H]([C@H]([C@@H]([C@H](O2)CO)O)O)O	50.8	Organic oxygen compounds	Organooxygen compounds	Carbohydrates and carbohydrate conjugates	11243.2	67334.4	0	669063
5.45_275.0198m/z	Theophylline-7-acetic acid	C9H10N4O4	5.44865	275.02	neg	M+K-2H				50.8				238964	10875.6	5841.78	2335.89
6.56_451.1618m/z	2-(2-hydroxy-4-methoxyphenyl)propanoic acid	C10H12O4	6.5605	451.162	neg	2M+Hac-H				50.7				0	0	54442.9	554.05
8.41_259.1553m/z	(x)-2-Heptanol glucoside	C13H26O6	8.4103	259.155	neg	M-H2O-H	14138808	NZLSMMMVSHTELV-UHFFFAOYSA-N	CCCCCC(C)OC1C(C(C(C(O1)CO)O)O)O	50.7	Lipids and lipid-like molecules	Fatty Acyls	Fatty acyl glycosides	0	0	19940.6	0
6.00_492.2001n	Massonianoside B	C25H32O10	5.9971	491.193	neg	M-H, M+Cl	76311962	PHHIEOZUONPPQY-ROQFLNLZSA-N	C[C@H]1[C@@H]([C@H]([C@H]([C@@H](O1)OC2=C(C=C(C=C2)[C@@H]3[C@H](C4=C(O3)C(=CC(=C4)CCCO)O)CO)OC)O)O)O	50.6	Phenylpropanoids and polyketides	2-arylbenzofuran flavonoids		0	0	278073	0
8.83_294.1712m/z	Alprenolol	C15H23NO2	8.82897	294.171	neg	M+FA-H				50.2				0	0	8556.59	0
10.74_286.2147n	16-Hydroxy-10-oxohexadecanoic acid	C16H30O4	10.7351	285.207	neg	M-H, M+Na-2H	85837000	ZNMHENLYDLACAS-UHFFFAOYSA-N	C(CCCCC(=O)O)CCCC(=O)CCCCCCO	50.2	Lipids and lipid-like molecules	Fatty Acyls	Fatty acids and conjugates	2145.33	4173.09	48537.8	9316.18
9.70_253.1812m/z	Lubiminol	C15H26O3	9.70492	253.181	neg	M-H	10376937	LOLOOEMMLLRJKC-ZSAUSMIDSA-N	C[C@@H]1C[C@@H](C[C@@H]([C@]12CC[C@H](C2)C(=C)C)CO)O	50.1	Lipids and lipid-like molecules	Prenol lipids	Sesquiterpenoids	0	0	26141.7	1424.28
6.75_447.0923m/z	Baicalin	C21H18O11	6.75145	447.092	pos	M+H	64982	IKIIZLYTISPENI-ZFORQUDYSA-N	C1=CC=C(C=C1)C2=CC(=O)C3=C(C(=C(C=C3O2)O[C@H]4[C@@H]([C@H]([C@@H]([C@H](O4)C(=O)O)O)O)O)O)O	98.2	Phenylpropanoids and polyketides	Flavonoids	Flavonoid glycosides	225246	16772.1	38260.8	11199.4
12.16_391.2840m/z	Dioctyl Phthalate	C24H38O4	12.1568	391.284	pos	M+H	8346	MQIUGAXCHLFZKX-UHFFFAOYSA-N	CCCCCCCCOC(=O)C1=CC=CC=C1C(=O)OCCCCCCCC	97.7	Benzenoids	Benzene and substituted derivatives	Benzoic acids and derivatives	37020.1	23063.9	71812.7	41627.1
4.98_423.0923m/z	Mangiferin	C19H18O11	4.97567	423.092	pos	M+H	5281647	AEDDIBAIWPIIBD-ZJKJAXBQSA-N	C1=C2C(=CC(=C1O)O)OC3=C(C2=O)C(=C(C(=C3)O)[C@H]4[C@@H]([C@H]([C@@H]([C@H](O4)CO)O)O)O)O	97.5	Organoheterocyclic compounds	Benzopyrans	1-benzopyrans	123514	2761.83	3953.96	0
5.69_433.1128m/z	Isovitexin	C21H20O10	5.69367	433.113	pos	M+H	162350	MYXNWGACZJSMBT-VJXVFPJBSA-N	C1=CC(=CC=C1C2=CC(=O)C3=C(O2)C=C(C(=C3O)[C@H]4[C@@H]([C@H]([C@@H]([C@H](O4)CO)O)O)O)O)O	96.8	Phenylpropanoids and polyketides	Flavonoids	Flavonoid glycosides	201894	7433.61	12535.7	3460.22
9.80_369.1333m/z	Curcumin	C21H20O6	9.80117	369.133	pos	M+H	969516	VFLDPWHFBUODDF-FCXRPNKRSA-N	COC1=C(C=CC(=C1)/C=C/C(=O)CC(=O)/C=C/C2=CC(=C(C=C2)O)OC)O	96.3	Phenylpropanoids and polyketides	Diarylheptanoids	Linear diarylheptanoids	48274.8	10561.6	44995.5	11465.6
12.14_675.6766m/z	Erucamide	C22H43NO	12.1437	675.677	pos	2M+H	5365371	UAUDZVJPLUQNMU-KTKRTIGZSA-N	CCCCCCCC/C=C\CCCCCCCCCCCC(=O)N	95.3	Lipids and lipid-like molecules	Fatty Acyls	Fatty amides	246935	0	502426	332813
9.38_309.1119m/z	Bisdemethoxycurcumin	C19H16O4	9.38202	309.112	pos	M+H	5315472	PREBVFJICNPEKM-YDWXAUTNSA-N	C1=CC(=CC=C1/C=C/C(=O)CC(=O)/C=C/C2=CC=C(C=C2)O)O	94.9	Phenylpropanoids and polyketides	Diarylheptanoids	Linear diarylheptanoids	0	0	24191.2	0
8.78_318.3004m/z	Phytosphingosine	C18H39NO3	8.7791	318.3	pos	M+H	122121	AERBNCYCJBRYDG-KSZLIROESA-N	CCCCCCCCCCCCCC[C@H]([C@H]([C@H](CO)N)O)O	94.8	Organic nitrogen compounds	Organonitrogen compounds	Amines	31296	6699.39	4808.9	83600.3
14.81_118.0866m/z	Betaine	C5H11NO2	14.8114	118.087	pos	M+H	247	KWIUHFFTVRNATP-UHFFFAOYSA-N	C[N+](C)(C)CC(=O)[O-]	94.7	Organic acids and derivatives	Carboxylic acids and derivatives	Amino acids, peptides, and analogues	1.13107e+06	1.46084e+06	1.04873e+06	1.27611e+06
8.83_373.1280m/z	Sinensetin	C20H20O7	8.82603	373.128	pos	M+H	145659	LKMNXYDUQXAUCZ-UHFFFAOYSA-N	COC1=C(C=C(C=C1)C2=CC(=O)C3=C(C(=C(C=C3O2)OC)OC)OC)OC	94.3	Phenylpropanoids and polyketides	Flavonoids	O-methylated flavonoids	2023.88	0	27635.8	371.32
9.94_233.1108m/z	N-Cyclohexyl-2-benzothiazol-amine	C13H16N2S	9.94082	233.111	pos	M+H	591790	UPWPIFMHSFSVLE-UHFFFAOYSA-N	C1CCC(CC1)NC2=NC3=CC=CC=C3S2	94.2	Organoheterocyclic compounds	Benzothiazoles		1614.49	199982	17246.4	1317.56
8.97_345.0968m/z	Eupatorin	C18H16O7	8.97332	345.097	pos	M+H	97214	KLAOKWJLUQKWIF-UHFFFAOYSA-N	COC1=C(C=C(C=C1)C2=CC(=O)C3=C(C(=C(C=C3O2)OC)OC)O)O	94	Phenylpropanoids and polyketides	Flavonoids	O-methylated flavonoids	32088.5	5779.49	62180.1	4875.45
12.83_255.0839m/z	2-Isopropylthioxanthone	C16H14OS	12.8346	255.084	pos	M+H	79633	KTALPKYXQZGAEG-UHFFFAOYSA-N	CC(C)C1=CC2=C(C=C1)SC3=CC=CC=C3C2=O	93.9	Organoheterocyclic compounds	Thiochromenes		37173.2	7998.09	15492.9	5508.5
5.24_564.1482n	Vicenin III	C26H28O14	5.23902	565.156	pos	M+H-H2O, M+H	185958	MMDUKUSNQNWVET-MCIQUCDDSA-N	C1[C@H]([C@@H]([C@H]([C@@H](O1)C2=C3C(=C(C(=C2O)[C@H]4[C@@H]([C@H]([C@@H]([C@H](O4)CO)O)O)O)O)C(=O)C=C(O3)C5=CC=C(C=C5)O)O)O)O	93.6	Phenylpropanoids and polyketides	Flavonoids	Flavonoid glycosides	535426	6197.94	454544	210961
9.00_315.0863m/z	Pectolinarigenin	C17H14O6	8.99815	315.086	pos	M+H	5320438	GPQLHGCIAUEJQK-UHFFFAOYSA-N	COC1=CC=C(C=C1)C2=CC(=O)C3=C(O2)C=C(C(=C3O)OC)O	93.6	Phenylpropanoids and polyketides	Flavonoids	O-methylated flavonoids	142099	31413.6	91793	30985.5
0.75_133.0609m/z	L-Asparagine	C4H8N2O3	0.746017	133.061	pos	M+H	6267	DCXYFEDJOCDNAF-REOHCLBHSA-N	C([C@@H](C(=O)O)N)C(=O)N	93.6	Organic acids and derivatives	Carboxylic acids and derivatives	Amino acids, peptides, and analogues	2.08767e+06	2619.44	0	782.778
5.68_493.1342m/z	Tricin 5-Glucoside	C23H24O12	5.68168	493.134	pos	M+H	49800176	FLSOTPIEFVBPBU-LDBVRRDLSA-N	COC1=CC(=CC(=C1O)OC)C2=CC(=O)C3=C(O2)C=C(C=C3O[C@H]4[C@@H]([C@H]([C@@H]([C@H](O4)CO)O)O)O)O	93.6	Phenylpropanoids and polyketides	Flavonoids	Flavonoid glycosides	0	0	565804	0
8.02_301.0707m/z	Diosmetin	C16H12O6	8.02248	301.071	pos	M+H	5281612	MBNGWHIJMBWFHU-UHFFFAOYSA-N	COC1=C(C=C(C=C1)C2=CC(=O)C3=C(C=C(C=C3O2)O)O)O	93.2	Phenylpropanoids and polyketides	Flavonoids	O-methylated flavonoids	100862	4808.12	1559.32	9861.79
5.26_595.1663m/z	4'-O-Glucosylvitexin	C27H30O15	5.26348	595.166	pos	M+H	15596617	CQJPSSJEHVNDFL-WIQAIWCDSA-N	C1=CC(=CC=C1C2=CC(=O)C3=C(O2)C(=C(C=C3O)O)[C@H]4[C@@H]([C@H]([C@@H]([C@H](O4)CO)O)O)O)O[C@H]5[C@@H]([C@H]([C@@H]([C@H](O5)CO)O)O)O	93.1	Phenylpropanoids and polyketides	Flavonoids	Flavonoid glycosides	2888.33	0	296068	754.868
5.72_358.2700m/z	Ile Leu Ile	C18H35N3O4	5.71765	358.27	pos	M+H	145456192	GAZGFPOZOLEYAJ-YTFOTSKYSA-N	CC[C@H](C)[C@@H](C(=O)N[C@@H](CC(C)C)C(=O)N[C@@H]([C@@H](C)CC)C(=O)O)N	92.8	Organic acids and derivatives	Carboxylic acids and derivatives	Amino acids, peptides, and analogues	0	30154.4	0	18386.4
6.81_317.0656m/z	Eupafolin	C16H12O7	6.81263	317.066	pos	M+H	5317284	FHHSEFRSDKWJKJ-UHFFFAOYSA-N	COC1=C(C2=C(C=C1O)OC(=CC2=O)C3=CC(=C(C=C3)O)O)O	92.8	Phenylpropanoids and polyketides	Flavonoids	O-methylated flavonoids	31821.1	1731.18	4743.13	1536.64
12.70_524.3714m/z	LysoPC(0:0/18:0)	C26H54NO7P	12.7019	524.371	pos	M+H	24779491	IQGPMZRCLCCXAG-RUZDIDTESA-N	CCCCCCCCCCCCCCCCCC(=O)O[C@H](CO)COP(=O)([O-])OCC[N+](C)(C)C	92.5	Lipids and lipid-like molecules	Glycerophospholipids	Glycerophosphocholines	5744.53	3691.07	79031.9	4901.5
9.32_343.1175m/z	Scutellarein tetramethyl ether	C19H18O6	9.31972	343.118	pos	M+H	96118	URSUMOWUGDXZHU-UHFFFAOYSA-N	COC1=CC=C(C=C1)C2=CC(=O)C3=C(C(=C(C=C3O2)OC)OC)OC	92.2	Phenylpropanoids and polyketides	Flavonoids	O-methylated flavonoids	628.619	0	46163.2	266.474
2.33_218.1289m/z	5-Hydroxyltryptamine	C10H12N2O	2.3348	218.129	pos	M+ACN+H	5202	QZAYGJVTTNCVMB-UHFFFAOYSA-N	C1=CC2=C(C=C1O)C(=CN2)CCN	92	Organoheterocyclic compounds	Indoles and derivatives	Tryptamines and derivatives	0	6842.87	1.90902e+06	1357.27
7.30_303.0500m/z	quercetin	C15H10O7	7.30357	303.05	pos	M+H	5280343	REFJWTPEDVJJIY-UHFFFAOYSA-N	C1=CC(=C(C=C1C2=C(C(=O)C3=C(C=C(C=C3O2)O)O)O)O)O	92	Phenylpropanoids and polyketides	Flavonoids	Flavones	218782	29667.4	10947.3	17392.4
10.81_520.3398m/z	PC(18:2/0:0)	C26H50NO7P	10.8089	520.34	pos	M+H	497299	IHNKQIMGVNPMTC-RUZDIDTESA-N	CCCCCCCCCCCCCCCCCC(=O)OC[C@H](COP(=O)([O-])OCC[N+](C)(C)C)O	92	Lipids and lipid-like molecules	Glycerophospholipids	Glycerophosphocholines	25550.4	3404.56	20700.1	3385.05
4.63_246.1238m/z	D-Tryptophan	C11H12N2O2	4.62685	246.124	pos	M+ACN+H	9060	QIVBCDIJIAJPQS-SECBINFHSA-N	C1=CC=C2C(=C1)C(=CN2)C[C@H](C(=O)O)N	90.7	Organoheterocyclic compounds	Indoles and derivatives	Indolyl carboxylic acids and derivatives	0	1045.41	362930	0
6.80_255.0652m/z	daidzein	C15H10O4	6.80032	255.065	pos	M+H	5281708	ZQSIJRDFPHDXIC-UHFFFAOYSA-N	C1=CC(=CC=C1C2=COC3=C(C2=O)C=CC(=C3)O)O	90.5	Phenylpropanoids and polyketides	Isoflavonoids	Isoflav-2-enes	0	0	14646.1	0
5.35_325.1911m/z	quinidine	C20H24N2O2	5.35355	325.191	pos	M+H				90				35764.6	71489.8	794119	96656.8
4.68_346.1973m/z	Val Asp Leu	C15H27N3O6	4.68412	346.197	pos	M+H	54553511	ZLNYBMWGPOKSLW-LSJOCFKGSA-N	CC(C)[C@@H](C(=O)N[C@@H](C(C)C)C(=O)N[C@@H](CC(=O)O)C(=O)O)N	89.8	Organic acids and derivatives	Peptidomimetics	Hybrid peptides	0	49115.8	0	23830.1
14.87_325.1912m/z	quinine	C20H24N2O2	14.8714	325.191	pos	M+H				89.8				90447.5	168207	205671	231927
7.89_389.0868m/z	3,4,5-trihydroxy-6-{[2-oxo-6-(3-oxobut-1-en-1-yl)-2H-chromen-7-yl]oxy}oxane-2-carboxylic acid	C19H18O10	7.89233	389.087	pos	M+H-H2O				89.6				418.027	0	22351.4	37660
11.30_496.3399m/z	PC(16:0/0:0)	C24H50NO7P	11.3018	496.34	pos	M+H	460602	ASWBNKHCZGQVJV-HSZRJFAPSA-N	CCCCCCCCCCCCCCCC(=O)OC[C@H](COP(=O)([O-])OCC[N+](C)(C)C)O	89.1	Lipids and lipid-like molecules	Glycerophospholipids	Glycerophosphocholines	20400.8	14332.9	169316	14692.4
3.88_200.0473m/z	Mulberrofuran M	C9H10ClNO2	3.87532	200.047	pos	M+H	21594897	UCGIUWUATGREEP-UHFFFAOYSA-N	CC12CC(C3=C(O1)C=C(C=C3)O)C4=C(C2=O)C5=C(O4)C=C(C=C5OC(=O)C6=C(C=C(C=C6)O)O)C7=CC8=C(O7)C=C(C=C8)O	89.1	Phenylpropanoids and polyketides	2-arylbenzofuran flavonoids		5360.49	14220	619202	31042.9
0.89_268.1041m/z	Adenosine	C10H13N5O4	0.889883	268.104	pos	M+H	60961	OIRDTQYFTABQOQ-KQYNXXCUSA-N	C1=NC(=C2C(=N1)N(C=N2)[C@H]3[C@@H]([C@@H]([C@H](O3)CO)O)O)N	88.8	Nucleosides, nucleotides, and analogues	Purine nucleosides		0	0	0	20290.2
6.89_279.0863m/z	6-(4-ethyl-3-hydroxyphenoxy)-3,4,5-trihydroxyoxane-2-carboxylic acid	C14H18O8	6.893	279.086	pos	M+H-2H2O	131832860	SUAFKEIYLAQXIP-UHFFFAOYSA-N	CCC1=C(C=C(C=C1)OC2C(C(C(C(O2)C(=O)O)O)O)O)O	88.3	Organic oxygen compounds	Organooxygen compounds	Carbohydrates and carbohydrate conjugates	24648.3	980.586	0	0
8.22_269.0444m/z	Cumoestrol	C15H8O5	8.22497	269.044	pos	M+H	5281707	ZZIALNLLNHEQPJ-UHFFFAOYSA-N	C1=CC2=C(C=C1O)OC3=C2C(=O)OC4=C3C=CC(=C4)O	87.9	Phenylpropanoids and polyketides	Isoflavonoids	Coumestans	28511	2598.22	1313.71	1143.37
5.18_374.2284m/z	Ile Glu Leu	C17H31N3O6	5.18195	374.228	pos	M+H	145456135	LPXHYGGZJOCAFR-MNXVOIDGSA-N	CC[C@H](C)[C@@H](C(=O)N[C@@H](CCC(=O)O)C(=O)N[C@@H](CC(C)C)C(=O)O)N	87.9	Organic acids and derivatives	Carboxylic acids and derivatives	Amino acids, peptides, and analogues	0	98643.7	0	43104
7.27_557.1660m/z	ax-4''-Hydroxy-3-'-methoxymaysin	C28H32O14	7.26872	557.166	pos	M+H-2H2O				87.9				0	0	37902.4	0
11.22_291.1955m/z	Corchorifatty acid D	C18H28O4	11.2216	291.195	pos	M+H-H2O				87.4				28815.1	6013.95	5006.79	5178.58
6.75_271.0600m/z	baicalein	C15H10O5	6.75145	271.06	pos	M+H	5281605	FXNFHKRTJBSTCS-UHFFFAOYSA-N	C1=CC=C(C=C1)C2=CC(=O)C3=C(O2)C=C(C(=C3O)O)O	87.4	Phenylpropanoids and polyketides	Flavonoids	Flavones	30835.1	11098.6	8475.36	7466.31
4.49_374.2285m/z	Ile Leu Glu	C17H31N3O6	4.49405	374.229	pos	M+H	145456189	HUORUFRRJHELPD-MNXVOIDGSA-N	CC[C@H](C)[C@@H](C(=O)N[C@@H](CC(C)C)C(=O)N[C@@H](CCC(=O)O)C(=O)O)N	87.3	Organic acids and derivatives	Carboxylic acids and derivatives	Amino acids, peptides, and analogues	0	31814.4	0	4990.38
0.83_497.1481m/z	a-L-Arabinofuranosyl-(1->2)-[a-D-mannopyranosyl-(1->6)]-D-mannose	C17H30O15	0.832433	497.148	pos	M+Na	76376878	KXPJZDSXKZWJBT-UHFFFAOYSA-N	C(C1C(C(C(C(O1)OCC2C(C(C(C(O2)O)OC3C(C(C(O3)CO)O)O)O)O)O)O)O)O	87.3	Organic oxygen compounds	Organooxygen compounds	Carbohydrates and carbohydrate conjugates	0	5.21296e+06	0	2.72842e+06
5.00_219.1128m/z	N-Acetylserotonin	C12H14N2O2	4.9993	219.113	pos	M+H	903	MVAWJSIDNICKHF-UHFFFAOYSA-N	CC(=O)NCCC1=CNC2=C1C=C(C=C2)O	87.3	Organoheterocyclic compounds	Indoles and derivatives	Hydroxyindoles	180.633	26.4799	19311.4	9.06483
5.04_331.2107n	Ile Ser Leu	C15H29N3O5	5.04467	332.218	pos	M+H, M+ACN+H	145456264	PELCGFMHLZXWBQ-BJDJZHNGSA-N	CC[C@H](C)[C@@H](C(=O)N[C@@H](CO)C(=O)N[C@@H](CC(C)C)C(=O)O)N	87.2	Organic acids and derivatives	Carboxylic acids and derivatives	Amino acids, peptides, and analogues	51.355	206739	0	97227.6
0.85_277.1162n	N-(1-Deoxy-1-fructosyl)proline	C11H19NO7	0.8521	278.123	pos	M+H-H2O, M+H	131752381	GSFRYAKUDPPHHG-MKSMHYHASA-N	C1CC(N(C1)CC2([C@H]([C@@H]([C@H](O2)CO)O)O)O)C(=O)O	86.9	Organic acids and derivatives	Carboxylic acids and derivatives	Amino acids, peptides, and analogues	261039	18491.9	0	6878.52
7.28_317.0656m/z	7-hydroxy-6-methoxy-3-(1,2,5-trihydroxy-4-oxocyclohex-2-en-1-yl)-4H-chromen-4-one	C16H14O8	7.27882	317.066	pos	M+H-H2O	131835065	MMWKZXAYWRUJJX-UHFFFAOYSA-N	COC1=CC(CCC1=O)(C2=C(C(=O)C3=C(O2)C=C(C(=C3O)OC)O)O)O	86.6	Organoheterocyclic compounds	Benzopyrans	1-benzopyrans	430220	32938.8	1770.4	5510.8
5.94_301.1071m/z	Yomogiartemin	C17H20O7	5.93627	301.107	pos	M+H-2H2O	155327	ZLXIFWIIPCMMHF-BJVHOVFPSA-N	CC(=O)O[C@H]1C[C@@]([C@]23[C@@H]([C@@H]4[C@@H]1C(=C)C(=O)O4)[C@@]5([C@H]([C@H]2O3)O5)C)(C)O	86.5	Lipids and lipid-like molecules	Prenol lipids	Terpene lactones	68701.4	1415.97	499.838	0
8.15_301.0706m/z	Isokaempferide	C16H12O6	8.15237	301.071	pos	M+H	5280862	VJJZJBUCDWKPLC-UHFFFAOYSA-N	COC1=C(OC2=CC(=CC(=C2C1=O)O)O)C3=CC=C(C=C3)O	86	Phenylpropanoids and polyketides	Flavonoids	O-methylated flavonoids	20154.4	2028.81	1487.2	647.011
13.93_264.2452n	((+-))-(Z)-2-(5-Tetradecenyl)cyclobutanone	C18H32O	13.9291	282.279	pos	M+H, M+NH4, M+H-H2O				85.3				5.92968e+06	6.75876e+06	3.40409e+06	6.46968e+06
9.72_335.2213m/z	13,14-Dihydro-15-keto-PGA2	C20H30O4	9.7243	335.221	pos	M+H				85.3				20537.2	2268.76	3006.96	2097.73
1.05_146.0925m/z	4-Guanidinobutanoic acid	C5H11N3O2	1.0464	146.092	pos	M+H	500	TUHVEAJXIMEOSA-UHFFFAOYSA-N	C(CC(=O)O)CN=C(N)N	85.2	Organic acids and derivatives	Carboxylic acids and derivatives	Amino acids, peptides, and analogues	242205	0	0	0
9.84_356.3522m/z	1,20-Eicosanediol	C20H42O2	9.83922	356.352	pos	M+ACN+H	4134690	PGMMMHFNKZSYEP-UHFFFAOYSA-N	C(CCCCCCCCCCO)CCCCCCCCCO	85.2	Lipids and lipid-like molecules	Fatty Acyls	Fatty alcohols	139429	137412	67343.3	186697
8.78_439.1026m/z	3''-O-Acetylafzelin	C23H22O11	8.7791	439.103	pos	M+H-2H2O	14861226	APRVHMRKRPHQLM-UHFFFAOYSA-N	CC1C(C(C(C(O1)OC2=C(OC3=CC(=CC(=C3C2=O)O)O)C4=CC=C(C=C4)O)O)OC(=O)C)O	85.1	Phenylpropanoids and polyketides	Flavonoids	Flavonoid glycosides	15577.1	0	0	0
6.20_306.2638m/z	(S)-10,16-Dihydroxyhexadecanoic acid	C16H32O4	6.19737	306.264	pos	M+NH4	10989850	VJZBXAQGWLMYMS-HNNXBMFYSA-N	C(CCCCC(=O)O)CCC[C@@H](CCCCCCO)O	84.8	Lipids and lipid-like molecules	Fatty Acyls	Fatty acids and conjugates	9253.94	20553.2	0	8329.98
5.89_392.2543m/z	Leu Leu Phe	C21H33N3O4	5.88798	392.254	pos	M+H	145457205	KJJROSNFBRWPHS-JYJNAYRXSA-N	CC(C)C[C@@H](C(=O)O)NC(=O)[C@H](CCC(=O)O)NC(=O)[C@H](CC1=CC=CC=C1)N	84.8	Organic acids and derivatives	Carboxylic acids and derivatives	Amino acids, peptides, and analogues	0	40706.4	311.29	37923.1
7.50_345.1332m/z	Carpinontriol B	C19H20O6	7.50263	345.133	pos	M+H	85374891	HXRHVUWGMADGQP-UHFFFAOYSA-N	C1CC(=O)C(C(C(CC2=CC(=C(C=C2)O)C3=C(C=CC1=C3)O)O)O)O	84.8	Phenylpropanoids and polyketides	Diarylheptanoids	Cyclic diarylheptanoids	1356.27	1266.62	0	15395.9
11.42_325.3213m/z	Octadecanamide	C18H37NO	11.4199	325.321	pos	M+ACN+H	31292	LYRFLYHAGKPMFH-UHFFFAOYSA-N	CCCCCCCCCCCCCCCCCC(=O)N	84.7	Organic acids and derivatives	Carboximidic acids and derivatives	Carboximidic acids	0	68584.6	165413	14712.8
7.23_469.3315m/z	Glabric acid	C30H46O5	7.2318	469.331	pos	M+H-H2O	46173993	HFTWTHSIMCSLFQ-CMLLUXCUSA-N	C[C@@]12CC[C@@]3(C(=CC(=O)[C@H]4[C@]3(CC[C@@H]5[C@@]4(CC[C@@H](C5(C)C)O)C)C)[C@@H]1C[C@]([C@@H](C2)O)(C)C(=O)O)C	84.7	Lipids and lipid-like molecules	Prenol lipids	Triterpenoids	0	0	55550.4	0
13.66_411.2305m/z	Corydaline	C22H27NO4	13.6602	411.231	pos	M+ACN+H				84.7				10461.1	16104.1	990.431	1497.08
0.82_546.1800n	Xylotetraose	C20H34O17	0.822533	569.169	pos	M+2Na, M+Na	10230811	KPTPSLHFVHXOBZ-BIKCPUHGSA-N	C1[C@H]([C@@H]([C@H]([C@@H](O1)O[C@@H]2CO[C@H]([C@@H]([C@H]2O)O)O[C@@H]3CO[C@H]([C@@H]([C@H]3O)O)O[C@@H]4COC([C@@H]([C@H]4O)O)O)O)O)O	84.7	Organic oxygen compounds	Organooxygen compounds	Carbohydrates and carbohydrate conjugates	0	170496	0	4.83735e+06
5.94_347.1126m/z	3,4,5-trihydroxy-6-{5-methoxy-2-[(1E)-3-oxopent-1-en-1-yl]phenoxy}oxane-2-carboxylic acid	C18H22O9	5.93627	347.113	pos	M+H-2H2O				84.6				72729.8	436.07	62076.3	1058
6.66_308.2221m/z	N-[[3-Hydroxy-2-(2-pentenyl)cyclopentyl]acetyl]isoleucine	C18H31NO4	6.65558	308.222	pos	M+H-H2O	131753085	SJUZAQZEDDCWNC-VOTSOKGWSA-N	CC/C=C/CC1C(CCC1O)CC(=O)NC(C(C)CC)C(=O)O	84.6	Organic acids and derivatives	Carboxylic acids and derivatives	Amino acids, peptides, and analogues	12087.6	1010.84	28411.7	682.479
8.88_385.2584m/z	11b-PGE2	C20H32O5	8.8767	385.258	pos	M+CH3OH+H				84.6				0	0	38489.5	0
6.04_259.0966m/z	Hamaudol	C15H16O5	6.0379	259.097	pos	M+H-H2O	164722	VOTLUFSYIRHICX-LBPRGKRZSA-N	CC1=CC(=O)C2=C(C3=C(C=C2O1)OC([C@H](C3)O)(C)C)O	84.3	Organoheterocyclic compounds	Benzopyrans	1-benzopyrans	30927.2	483.817	0	0
9.37_539.0975m/z	Morelloflavone	C30H20O11	9.36997	539.098	pos	M+H-H2O	5464454	GFWPWSNIXRDQJC-LMSSTIIKSA-N	C1=CC(=CC=C1[C@@H]2[C@H](C(=O)C3=C(C=C(C=C3O2)O)O)C4=C(C=C(C5=C4OC(=CC5=O)C6=CC(=C(C=C6)O)O)O)O)O	84.2	Phenylpropanoids and polyketides	Flavonoids	Biflavonoids and polyflavonoids	140124	62519.9	194823	60480.2
7.63_435.1287m/z	Engeletin	C21H22O10	7.63293	435.129	pos	M+H	6453452	VQUPQWGKORWZII-WDPYGAQVSA-N	C[C@H]1[C@@H]([C@H]([C@H]([C@@H](O1)O[C@@H]2[C@H](OC3=CC(=CC(=C3C2=O)O)O)C4=CC=C(C=C4)O)O)O)O	84	Phenylpropanoids and polyketides	Flavonoids	Flavonoid glycosides	179350	377.845	0	0
6.93_121.0651m/z	Phenylacetaldehyde	C8H8O	6.92912	121.065	pos	M+H	998	DTUQWGWMVIHBKE-UHFFFAOYSA-N	C1=CC=C(C=C1)CC=O	83.9	Benzenoids	Benzene and substituted derivatives	Phenylacetaldehydes	67234.4	1877.68	3323	2551.29
0.79_447.1086m/z	Isosilybin	C25H22O10	0.792383	447.109	pos	M+H-2H2O				83.9				0	237619	0	110073
7.96_331.0811m/z	Aflatoxin B2a	C17H14O7	7.96323	331.081	pos	M+H	104825	PFQSKXVNBUHPIW-AUWAXLAASA-N	COC1=C2C3=C(C(=O)CC3)C(=O)OC2=C4[C@@H]5C[C@@H](O[C@@H]5OC4=C1)O	83.9	Phenylpropanoids and polyketides	Coumarins and derivatives	Furanocoumarins	7.66083e+06	760713	513849	900304
9.13_349.2010m/z	Pterisolic acid F	C20H30O6	9.13267	349.201	pos	M+H-H2O	53238562	DEXISWHCLDQHNE-XPDSNTSVSA-N	C[C@]1(CCC[C@@]2([C@@H]1CC[C@]34[C@]2(CC[C@H](C3)[C@@](C4=O)(CO)O)O)C)C(=O)O	83.8	Lipids and lipid-like molecules	Prenol lipids	Diterpenoids	954.736	0	10417.9	217.936
5.79_493.1341m/z	Malvidin 3-O-glucoside	C23H24O12	5.78565	493.134	pos	M+H	443652	PXUQTDZNOHRWLI-OXUVVOBNSA-O	COC1=CC(=CC(=C1O)OC)C2=[O+]C3=CC(=CC(=C3C=C2O[C@H]4[C@@H]([C@H]([C@@H]([C@H](O4)CO)O)O)O)O)O	83.8	Phenylpropanoids and polyketides	Flavonoids	Flavonoid glycosides	0	0	142975	0
0.78_98.0373n	Tulipalin A	C5H6O2	0.783533	99.0445	pos	M+H-H2O, M+H	68352	GSLDEZOOOSBFGP-UHFFFAOYSA-N	C=C1CCOC1=O	83.8	Organoheterocyclic compounds	Lactones	Gamma butyrolactones	34687.8	8363.18	0	2666.61
10.52_277.2162m/z	((+-))-(E)-13-Hydroxy-10-oxo-11-octadecenoic acid	C18H32O4	10.5156	277.216	pos	M+H-2H2O				83.6				4579.29	2256.89	12365.4	1542.18
4.28_332.2179m/z	Ile Ile Ser	C15H29N3O5	4.28018	332.218	pos	M+H	145456183	PFPUFNLHBXKPHY-HTFCKZLJSA-N	CC[C@H](C)[C@@H](C(=O)N[C@@H]([C@@H](C)CC)C(=O)N[C@@H](CO)C(=O)O)N	83.6	Organic acids and derivatives	Carboxylic acids and derivatives	Amino acids, peptides, and analogues	0	23306	0	427.916
0.76_120.0658m/z	Threonine	C4H9NO3	0.764933	120.066	pos	M+H	6288	AYFVYJQAPQTCCC-GBXIJSLDSA-N	C[C@H]([C@@H](C(=O)O)N)O	83.5	Organic acids and derivatives	Carboxylic acids and derivatives	Amino acids, peptides, and analogues	417333	2940.75	0	1316.83
7.93_517.1702m/z	Durantoside I	C26H32O13	7.92638	517.17	pos	M+H-2H2O	95223135	YRARGBWFOYODHQ-IQHUSNMXSA-N	C[C@@]1([C@H](C[C@]2([C@@H]1[C@@H](OC=C2C(=O)OC)O[C@H]3[C@@H]([C@H]([C@@H]([C@H](O3)CO)O)O)O)O)OC(=O)/C=C/C4=CC=CC=C4)O	83.4	Lipids and lipid-like molecules	Prenol lipids	Terpene glycosides	23739.6	0	0	0
8.15_433.1494m/z	Forsythenside A	C22H26O10	8.15237	433.149	pos	M+H-H2O	11797786	KGHHLKGLDXFSCV-QNDFHXLGSA-N	C1=CC(=CC=C1CC(=O)OC[C@@H]2[C@H]([C@@H]([C@H]([C@@H](O2)OCCC3(C=CC(=O)C=C3)O)O)O)O)O	83.3	Organic oxygen compounds	Organooxygen compounds	Carbohydrates and carbohydrate conjugates	0	0	32176.4	624.244
8.94_469.3312m/z	Glabrolide	C30H44O4	8.93618	469.331	pos	M+H	90479675	SSHDNSCEQSPWIM-FVTWEACWSA-N	C[C@]12CC[C@@H](C([C@@H]1CC[C@@]3([C@@H]2C(=O)C=C4[C@]3(CC[C@@]5([C@H]4C[C@@]6(C[C@H]5OC6=O)C)C)C)C)(C)C)O	83.2	Lipids and lipid-like molecules	Prenol lipids	Triterpenoids	1202.51	957.494	48442.5	421.146
7.15_361.0915m/z	Aflatoxin M4	C17H12O7	7.15183	361.091	pos	M+CH3OH+H				83				4253.23	0	39141.9	0
2.09_310.1286m/z	N-(1-Deoxy-1-fructosyl)phenylalanine	C15H21NO7	2.08518	310.129	pos	M+H-H2O	101039148	FAVRCIXPIVJIPN-VJDSNFAGSA-N	C1=CC=C(C=C1)C[C@@H](C(=O)O)NCC2([C@H]([C@@H]([C@H](O2)CO)O)O)O	83	Organic acids and derivatives	Carboxylic acids and derivatives	Amino acids, peptides, and analogues	18002.3	84890	0	67248.1
11.77_301.2163m/z	15S-hydroxy-5Z,8Z,11Z,13E,17Z-eicosapentaenoic acid	C20H30O3	11.7735	301.216	pos	M+H-H2O	5283196	FPMFSFWYWZLDKP-XWJJKCKWSA-N	CC/C=C\CC(/C=C/C=C\C/C=C\C/C=C\CCCC(=O)O)OO	82.7	Lipids and lipid-like molecules	Fatty Acyls	Eicosanoids	3415.8	229.017	85798.5	4708.84
7.14_543.1492m/z	Camellianin B	C27H30O14	7.14025	543.149	pos	M+H-2H2O	5487342	LRFDUPNLCDXZOE-ZLDQKHMLSA-N	C[C@H]1[C@@H]([C@H]([C@H]([C@@H](O1)O[C@@H]2[C@H](O[C@H]([C@@H]([C@H]2O)O)OC3=CC(=CC4=C3C(=O)C=C(O4)C5=CC=C(C=C5)O)O)CO)O)O)O	82.6	Phenylpropanoids and polyketides	Flavonoids	Flavonoid glycosides	38986.8	458.966	2066.26	8036.57
11.45_279.2319m/z	linolenic acid	C18H30O2	11.4452	279.232	pos	M+H	5280934	DTOSIQBPPRVQHS-PDBXOOCHSA-N	CC/C=C\C/C=C\C/C=C\CCCCCCCC(=O)O	82.5	Lipids and lipid-like molecules	Fatty Acyls	Lineolic acids and derivatives	18652.1	21159.8	202503	18479.5
8.34_439.1026m/z	Apigenin 7-O-(6''-O-acetylglucoside)	C23H22O11	8.33545	439.103	pos	M+H-2H2O				82.3				40919.4	0	0	0
7.72_353.1019m/z	Glycyrrhizaflavonol A	C20H18O7	7.7152	353.102	pos	M+H-H2O	5317765	UFWHTSBKDGUFOX-UHFFFAOYSA-N	CC1(C(CC2=C(O1)C=CC(=C2)C3=C(C(=O)C4=C(C=C(C=C4O3)O)O)O)O)C	82.2	Phenylpropanoids and polyketides	Flavonoids	Flavones	23641.3	0	0	0
7.98_230.2479m/z	N,N-Dimethyldodecylamine N-oxide	C14H31NO	7.9759	230.248	pos	M+H	15433	SYELZBGXAIXKHU-UHFFFAOYSA-N	CCCCCCCCCCCC[N+](C)(C)[O-]	82.2	Organic nitrogen compounds	Organonitrogen compounds	Aminoxides	218965	266223	65496.3	179252
9.41_285.0757m/z	Obtusifolin	C16H12O5	9.40722	285.076	pos	M+H	3083575	NYRXUBDGDSRBGB-UHFFFAOYSA-N	CC1=CC2=C(C(=C1O)OC)C(=O)C3=C(C2=O)C=CC=C3O	82.2	Benzenoids	Anthracenes	Anthraquinones	44233.6	24003.9	39490.9	27006.8
5.94_493.1342m/z	5''-O-Acetyljuglanin	C22H20O11	5.93627	493.134	pos	M+CH3OH+H				81.6				0	0	0	0
7.09_515.1548m/z	Eurostoside	C24H28O11	7.09285	515.155	pos	M+Na	20839507	DQTBTFHCLVMGBP-WXUDOLSOSA-N	C1=CO[C@H]([C@H]2[C@@H]1[C@@H](C=C2COC(=O)/C=C/C3=CC=C(C=C3)O)O)O[C@H]4[C@@H]([C@H]([C@@H]([C@H](O4)CO)O)O)O	81.6	Lipids and lipid-like molecules	Prenol lipids	Terpene glycosides	159103	3792.5	0	0
7.35_403.1387m/z	7-Hydroxyflavanone-glucoside	C21H22O8	7.35035	403.139	pos	M+H	40473151	HPMCYOSTTZQBAP-ZRWXNEIDSA-N	C1[C@H](OC2=C(C1=O)C=CC(=C2)O[C@H]3[C@@H]([C@H]([C@@H]([C@H](O3)CO)O)O)O)C4=CC=CC=C4	81.5	Phenylpropanoids and polyketides	Flavonoids	Flavonoid glycosides	2439.74	0	87484.4	2365.6
1.81_252.1092m/z	Cordycepin	C10H13N5O3	1.8129	252.109	pos	M+H	6303	OFEZSBMBBKLLBJ-BAJZRUMYSA-N	C1[C@H](O[C@H]([C@@H]1O)N2C=NC3=C(N=CN=C32)N)CO	81.4	Nucleosides, nucleotides, and analogues	Purine nucleosides	Purine 3'-deoxyribonucleosides	3509.1	3072.09	0	1.64092e+06
8.77_302.3053m/z	Sphinganine	C18H39NO2	8.7664	302.305	pos	M+H	91486	OTKJDMGTUTTYMP-ZWKOTPCHSA-N	CCCCCCCCCCCCCCC[C@H]([C@H](CO)N)O	81.3	Organic nitrogen compounds	Organonitrogen compounds	Amines	1.36206e+06	1.53602e+06	664409	1.63972e+06
4.85_178.0631n	Methyl 4-hydroxycinnamate	C10H10O3	4.8527	179.07	pos	M+H, M+ACN+H	5319562	NITWSHWHQAQBAW-QPJJXVBHSA-N	COC(=O)/C=C/C1=CC=C(C=C1)O	81.3	Phenylpropanoids and polyketides	Cinnamic acids and derivatives	Hydroxycinnamic acids and derivatives	58438.4	3623.79	4380.22	7118.18
5.23_271.1177m/z	Benzyl glucopyranoside	C13H18O6	5.22722	271.118	pos	M+H	11076492	GKHCBYYBLTXYEV-HENWMNBSSA-N	C1=CC=C(C=C1)COC2[C@@H]([C@H]([C@@H]([C@H](O2)CO)O)O)O	81.2	Organic oxygen compounds	Organooxygen compounds	Carbohydrates and carbohydrate conjugates	774.923	0	14080.1	0
6.98_467.0972m/z	6''-O-Malonyldaidzin	C24H22O12	6.97533	467.097	pos	M+H-2H2O	9913968	MTXMHWSVSZKYBT-ASDZUOGYSA-N	C1=CC(=CC=C1C2=COC3=C(C2=O)C=CC(=C3)O[C@H]4[C@@H]([C@H]([C@@H]([C@H](O4)COC(=O)CC(=O)O)O)O)O)O	81.2	Phenylpropanoids and polyketides	Isoflavonoids	Isoflavonoid O-glycosides	29762.2	0	0	0
11.52_299.2825n	Sphingosine	C18H37NO2	11.5223	300.29	pos	M+H, M+Na	5280335	WWUZIQQURGPMPG-KRWOKUGFSA-N	CCCCCCCCCCCCC/C=C/[C@H]([C@H](CO)N)O	80.9	Organic nitrogen compounds	Organonitrogen compounds	Amines	1832.86	12370.6	2109.69	1310.05
4.75_382.1971m/z	Tyr Ser Leu	C18H27N3O6	4.75278	382.197	pos	M+H	4584009	UCNNZELZXFXXJQ-UHFFFAOYSA-N	CC(C)CC(C(=O)NC(CC(C)C)C(=O)NC(CC1=CC=C(C=C1)O)C(=O)O)N	80.8	Organic acids and derivatives	Carboxylic acids and derivatives	Amino acids, peptides, and analogues	0	26910.8	0	7935.75
11.51_269.2264m/z	anhydroretinol	C20H28	11.5098	269.226	pos	M+H				80.8				0	0	18126.9	0
8.27_401.1231m/z	ethyl 3-(2,3-dihydrobenzo[b][1,4]dioxin-6-yl)-7-hydroxy-4-oxo-4H-chromene-2-carboxylate	C20H16O7	8.27493	401.123	pos	M+CH3OH+H	5428920	NTNSKOKPJWYQGX-UHFFFAOYSA-N	CCOC(=O)C1=C(C(=O)C2=C(O1)C=C(C=C2)O)C3=CC4=C(C=C3)OCCO4	80.8	Phenylpropanoids and polyketides	Isoflavonoids	Isoflav-2-enes	0	0	42644.2	45008.8
6.31_336.1230m/z	Glyzarin	C18H14O4	6.31023	336.123	pos	M+ACN+H	44257206	KTCOGEGNUCOCON-UHFFFAOYSA-N	CC1=C(C(=O)C2=C(O1)C(=C(C=C2)O)C(=O)C)C3=CC=CC=C3	80.8	Phenylpropanoids and polyketides	Isoflavonoids	Isoflav-2-enes	36096.4	3780.02	245081	4411.32
7.79_497.1445m/z	2'',6''-Di-O-acetylononin	C26H26O11	7.78673	497.144	pos	M+H-H2O	21057652	WAYQNCRYBDCMOP-UHFFFAOYSA-N	CC(=O)OCC1C(C(C(C(O1)OC2=CC3=C(C=C2)C(=O)C(=CO3)C4=CC=C(C=C4)OC)OC(=O)C)O)O	80.8	Phenylpropanoids and polyketides	Isoflavonoids	Isoflavonoid O-glycosides	157724	7078.22	91638.9	55055.7
9.89_359.1123m/z	5-Hydroxy-2',4',7,8-Tetramethoxyflavone	C19H18O7	9.89142	359.112	pos	M+H	14307943	AHUAGKUYEMQHTH-UHFFFAOYSA-N	COC1=CC(=C(C=C1)C2=CC(=O)C3=C(O2)C(=C(C=C3O)OC)OC)OC	80.5	Phenylpropanoids and polyketides	Flavonoids	O-methylated flavonoids	13710.5	1773.63	28002.2	1905.25
5.43_595.1663m/z	Vitexin 2''-O-beta-D-glucoside	C27H30O15	5.43033	595.166	pos	M+H	5280641	FYTOTHFWELWOCG-OAFKVUNRSA-N	C1=CC(=CC=C1C2=CC(=O)C3=C(O2)C(=C(C=C3O)O)[C@H]4[C@@H]([C@H]([C@@H]([C@H](O4)CO)O)O)O[C@H]5[C@@H]([C@H]([C@@H]([C@H](O5)CO)O)O)O)O	80.4	Phenylpropanoids and polyketides	Flavonoids	Flavonoid glycosides	67898.3	0	7535.94	35490.3
8.47_278.1519n	7-Dehydrobrefeldin A	C16H22O4	8.47178	261.149	pos	M+H-H2O, M+H	6441091	IKUWMGOXYQGWPC-TWAINWRDSA-N	C[C@H]1CCC/C=C/[C@@H]2CC(=O)C[C@H]2[C@@H](/C=C/C(=O)O1)O	80.4	Phenylpropanoids and polyketides	Macrolides and analogues		108283	16153.7	108460	15119.7
12.79_413.3780m/z	Stigmastane-3,5,6-triol	C29H52O3	12.7947	413.378	pos	M+H-2H2O	3036251	VGSSUFQMXBFFTM-METNKUIYSA-N	CC[C@H](CC[C@@H](C)[C@H]1CC[C@@H]2[C@@]1(CC[C@H]3[C@H]2C[C@H]([C@@]4([C@@]3(CC[C@@H](C4)O)C)O)O)C)C(C)C	80.1	Lipids and lipid-like molecules	Steroids and steroid derivatives	Stigmastanes and derivatives	937698	1.4127e+07	6.09696e+06	2.69237e+06
9.42_277.1798m/z	Tanacetol A	C17H26O4	9.42088	277.18	pos	M+H-H2O	76959295	ZPZUGHMDLKWJOU-LMSYVIICSA-N	C/C/1=C\[C@@H](CC(=C)C(=O)C[C@@H](CC1)C(C)(C)O)OC(=O)C	80	Lipids and lipid-like molecules	Prenol lipids	Sesquiterpenoids	128.238	0	28665	0
6.52_435.1651m/z	Vestitone 7-glucoside	C22H26O9	6.52065	435.165	pos	M+H	131751358	NJODPRHPJQYTHX-UHFFFAOYSA-N	COC1=CC(=C(C=C1)C2CC3=C(C=C(C=C3)OC4C(C(C(C(O4)CO)O)O)O)OC2)O	79.9	Phenylpropanoids and polyketides	Isoflavonoids	Isoflavonoid O-glycosides	0	0	29630.1	1289.69
5.41_441.1393m/z	Amygdalinic acid	C20H28O13	5.40753	441.139	pos	M+H-2H2O	6455326	IHWHGPUDYPIVLL-BFMJJVGDSA-N	C1=CC=C(C=C1)[C@H](C(=O)O)O[C@H]2[C@@H]([C@H]([C@@H]([C@H](O2)CO[C@H]3[C@@H]([C@H]([C@@H]([C@H](O3)CO)O)O)O)O)O)O	79.9	Organic oxygen compounds	Organooxygen compounds	Carbohydrates and carbohydrate conjugates	86376.4	4728.59	0	27514.9
8.04_383.1124m/z	Gaylussacin	C21H22O9	8.04458	383.112	pos	M+H-2H2O	6443751	UPCRMPLOWXXPFK-BNVRZUOOSA-N	C1=CC=C(C=C1)/C=C/C2=C(C(=CC(=C2)O[C@H]3[C@@H]([C@H]([C@@H]([C@H](O3)CO)O)O)O)O)C(=O)O	79.7	Phenylpropanoids and polyketides	Stilbenes	Stilbene glycosides	13836.2	364.029	0	649.996
5.14_381.1182m/z	2-Hydroxybenzaldehyde O-[xylosyl-(1->6)-glucoside]	C18H24O11	5.13648	381.118	pos	M+H-2H2O	12442950	DSDFXGQRZAFFQA-UHFFFAOYSA-N	C1C(C(C(C(O1)OCC2C(C(C(C(O2)OC3=CC=CC=C3C=O)O)O)O)O)O)O	79.5	Organic oxygen compounds	Organooxygen compounds	Carbohydrates and carbohydrate conjugates	21685.6	0	0	0
6.04_287.0913m/z	Herbarin	C16H16O6	6.0379	287.091	pos	M+H-H2O				79.2				58035.9	1105.64	0	0
4.98_316.2232m/z	Leu Ala Ile	C15H29N3O4	4.97567	316.223	pos	M+H	145456338	QPRQGENIBFLVEB-BJDJZHNGSA-N	CC[C@H](C)[C@@H](C(=O)O)NC(=O)[C@H](C)NC(=O)[C@H](CC(C)C)N	79.1	Organic acids and derivatives	Carboxylic acids and derivatives	Amino acids, peptides, and analogues	0	233062	0	210454
8.36_361.0917m/z	Centaureidin	C18H16O8	8.3598	361.092	pos	M+H	5315773	BZXULYMZYPRZOG-UHFFFAOYSA-N	COC1=C(C=C(C=C1)C2=C(C(=O)C3=C(O2)C=C(C(=C3O)OC)O)OC)O	78.7	Phenylpropanoids and polyketides	Flavonoids	O-methylated flavonoids	29416.5	967.136	307.493	0
12.07_293.2111m/z	(9Z,11R,12S,13S,15Z)-12,13-Epoxy-11-hydroxy-9,15-octadecadienoic acid	C18H30O4	12.065	293.211	pos	M+H-H2O	131751443	XHMGEKKHSKIGMI-JCMSFEFZSA-N	CC/C=C\CC1C(O1)C(/C=C/CCCCCCCC(=O)O)O	78.6	Lipids and lipid-like molecules	Fatty Acyls	Fatty acids and conjugates	35512.7	505.192	0	0
6.82_387.1074m/z	Catechin 7-arabinofuranoside	C20H22O10	6.824	387.107	pos	M+H-2H2O	51136539	JRAAEKBJXQXXBZ-DAJYORATSA-N	C1[C@@H]([C@H](OC2=CC(=CC(=C21)O)O[C@H]3[C@@H]([C@H]([C@@H](O3)CO)O)O)C4=CC(=C(C=C4)O)O)O	78.5	Phenylpropanoids and polyketides	Flavonoids	Flavonoid glycosides	6157.54	581.41	225296	34731.3
5.38_366.2023m/z	Ser Phe Leu	C18H27N3O5	5.37663	366.202	pos	M+H	145457847	UPLYXVPQLJVWMM-KKUMJFAQSA-N	CC(C)C[C@@H](C(=O)O)NC(=O)[C@H](CC1=CC=CC=C1)NC(=O)[C@H](CO)N	78.4	Organic acids and derivatives	Carboxylic acids and derivatives	Amino acids, peptides, and analogues	0	72274	0	33797.6
7.28_315.0499m/z	Wedelolactone	C16H10O7	7.27882	315.05	pos	M+H	5281813	XQDCKJKKMFWXGB-UHFFFAOYSA-N	COC1=CC(=C2C(=C1)OC(=O)C3=C2OC4=CC(=C(C=C43)O)O)O	78.4	Phenylpropanoids and polyketides	Isoflavonoids	Coumestans	21390.8	1968.75	0	0
6.14_301.0706m/z	Dattelic acid	C16H16O8	6.14122	301.071	pos	M+H-2H2O				77.8				14443.6	0	0	0
5.91_689.2079m/z	2-Feruloyl-1-sinapoylgentiobiose	C33H40O18	5.91225	689.208	pos	M+H-2H2O				77.7				0	0	160021	0
5.41_261.0759m/z	6-[(E)-2-(3,4-dihydroxyphenyl)ethenyl]-4-methoxy-2H-pyran-2-one	C14H12O5	5.40753	261.076	pos	M+H				77.7				10083.2	0	0	0
10.90_293.1746m/z	Lasiodiplodin	C17H24O4	10.9009	293.175	pos	M+H	14562696	OKWRDLQBKAOJNC-LBPRGKRZSA-N	C[C@H]1CCCCCCCC2=C(C(=CC(=C2)O)OC)C(=O)O1	77.7	Phenylpropanoids and polyketides	Macrolides and analogues		0	0	15625.6	139.239
12.67_782.5694m/z	PC(18:3(9Z,12Z,15Z)/18:1(9Z))	C44H80NO8P	12.6743	782.569	pos	M+H	53478727	DPEYXLDDNACOGV-ANVMUZGGSA-N	CCCCCC/C=C\CCCCCCCCCC(=O)OC[C@H](COP(=O)([O-])OCC[N+](C)(C)C)OC(=O)CCCCCCC/C=C\C/C=C\C/C=C\CC	77.6	Lipids and lipid-like molecules	Glycerophospholipids	Glycerophosphocholines	1.24983e+06	539100	151079	84163.4
5.62_428.1817m/z	Phe Asp Phe	C22H25N3O6	5.62367	428.182	pos	M+H	145454471	PYXXJFRXIYAESU-PCBIJLKTSA-N	CC[C@H](C)[C@@H](C(=O)N[C@@H](CC1=CC=CC=C1)C(=O)O)NC(=O)[C@H](CC(=O)O)N	77.6	Organic acids and derivatives	Carboxylic acids and derivatives	Amino acids, peptides, and analogues	0	12780	0	25782.8
6.89_233.0809m/z	7-hydroxy-6-(3-oxobutyl)-2H-chromen-2-one	C13H12O4	6.893	233.081	pos	M+H	131835248	CTKANKFBINKGJX-UHFFFAOYSA-N	CC(=O)CCC1=C(C=C2C(=C1)C=CC(=O)O2)O	77.3	Phenylpropanoids and polyketides	Coumarins and derivatives	Hydroxycoumarins	18761.4	732.683	0	0
6.27_689.2081m/z	Stachyose	C24H42O21	6.2662	689.208	pos	M+Na	439531	UQZIYBXSHAGNOE-XNSRJBNMSA-N	C([C@@H]1[C@@H]([C@@H]([C@H]([C@H](O1)OC[C@@H]2[C@@H]([C@@H]([C@H]([C@H](O2)OC[C@@H]3[C@H]([C@@H]([C@H]([C@H](O3)O[C@]4([C@H]([C@@H]([C@H](O4)CO)O)O)CO)O)O)O)O)O)O)O)O)O)O	77.3	Organic oxygen compounds	Organooxygen compounds	Carbohydrates and carbohydrate conjugates	0	0	111334	0
7.13_290.2689m/z	16-Hydroxy hexadecanoic acid	C16H32O3	7.1273	290.269	pos	M+NH4	10466	UGAGPNKCDRTDHP-UHFFFAOYSA-N	C(CCCCCCCC(=O)O)CCCCCCCO	77.2	Lipids and lipid-like molecules	Fatty Acyls	Fatty acids and conjugates	54822.9	110241	45081.2	50397.6
8.02_525.1395m/z	Apimaysin	C27H28O13	8.02248	525.139	pos	M+H-2H2O	194566	LCQVQAZLYBJMGJ-UHFFFAOYSA-N	CC1C(C(C(C(O1)OC2C(C(=O)C(OC2C3=C(C4=C(C=C3O)OC(=CC4=O)C5=CC=C(C=C5)O)O)C)O)O)O)O	77	Phenylpropanoids and polyketides	Flavonoids	Flavonoid glycosides	60669.6	0	0	0
0.83_123.0555m/z	nicotinamide	C6H6N2O	0.832433	123.056	pos	M+H	936	DFPAKSUCGFBDDF-UHFFFAOYSA-N	C1=CC(=CN=C1)C(=O)N	76.6	Organoheterocyclic compounds	Pyridines and derivatives	Pyridinecarboxylic acids and derivatives	26838	706.932	0	1205.2
6.11_493.1345m/z	6-Hydroxyluteolin 6,3'-dimethyl ether 7-glucoside	C23H24O12	6.10593	493.134	pos	M+H	44258501	YFZSQPRYLBGYKE-SLYRBRRESA-N	COC1=C(C=CC(=C1)C2=CC(=O)C3=C(C(=C(C=C3O2)O[C@H]4C([C@H]([C@@H](C(O4)CO)O)O)O)OC)O)O	76.5	Phenylpropanoids and polyketides	Flavonoids	Flavonoid glycosides	0	0	80221	0
1.16_150.0585m/z	L-Methionine	C5H11NO2S	1.15703	150.058	pos	M+H	6137	FFEARJCKVFRZRR-BYPYZUCNSA-N	CSCC[C@@H](C(=O)O)N	76.5	Organic acids and derivatives	Carboxylic acids and derivatives	Amino acids, peptides, and analogues	23907.6	41704	0	53217.9
0.78_342.1162n	Gentiobiose	C12H22O11	0.783533	325.113	pos	M+H-H2O, M+H	441422	DLRVVLDZNNYCBX-LIZSDCNHSA-N	C([C@@H]1[C@H]([C@@H]([C@H]([C@@H](O1)OC[C@@H]2[C@H]([C@@H]([C@H]([C@@H](O2)O)O)O)O)O)O)O)O	76.5	Organic oxygen compounds	Organooxygen compounds	Carbohydrates and carbohydrate conjugates	383605	114722	0	57347.9
4.55_243.0865m/z	Securiterpenoside	C11H18O8	4.54925	243.087	pos	M+H-2H2O	5321222	QJALTHDWQWOLLT-ZBGLXGBJSA-N	C=C(CCO[C@H]1[C@@H]([C@H]([C@@H]([C@H](O1)CO)O)O)O)C(=O)O	76.4	Lipids and lipid-like molecules	Saccharolipids		11083.6	1504.95	0	0
7.05_373.1281m/z	Cyclokievitone hydrate	C20H20O7	7.04522	373.128	pos	M+H	131752226	YBSZKJGFDYIZGI-UHFFFAOYSA-N	CC1(C(CC2=C(O1)C=C(C3=C2OCC(C3=O)C4=C(C=C(C=C4)O)O)O)O)C	76.4	Phenylpropanoids and polyketides	Isoflavonoids	Isoflavans	83466.5	6683.77	12521	17333.6
1.23_254.1613m/z	Arginyl-Proline	C11H21N5O3	1.2329	254.161	pos	M+H-H2O	151003	LQJAALCCPOTJGB-YUMQZZPRSA-N	C1C[C@H](N(C1)C(=O)[C@H](CCCN=C(N)N)N)C(=O)O	76.4	Organic acids and derivatives	Carboxylic acids and derivatives	Amino acids, peptides, and analogues	1528.73	48162.6	0	40784.6
8.16_417.1544m/z	Gancaonin D	C21H20O7	8.16398	417.154	pos	M+CH3OH+H	5317481	UCKSAYIMWMIZQJ-QDEBKDIKSA-N	C/C(=C\CC1=C2C(=C(C=C1O)O)C(=O)C(=CO2)C3=CC(=C(C=C3)OC)O)/CO	76.2	Phenylpropanoids and polyketides	Isoflavonoids	O-methylated isoflavonoids	0	0	39627.7	7580.92
14.06_563.2658m/z	Protoporphyrin IX	C34H34N4O4	14.0634	563.266	pos	M+H	4971	ZCFFYALKHPIRKJ-UHFFFAOYSA-N	CC1=C(C2=CC3=NC(=CC4=NC(=CC5=C(C(=C(N5)C=C1N2)C=C)C)C(=C4CCC(=O)O)C)C(=C3C)CCC(=O)O)C=C	75.9	Organoheterocyclic compounds	Tetrapyrroles and derivatives	Porphyrins	27142.2	0	0	0
0.63_147.1129m/z	D-Lysine	C6H14N2O2	0.628467	147.113	pos	M+H	57449	KDXKERNSBIXSRK-RXMQYKEDSA-N	C(CCN)C[C@H](C(=O)O)N	75.6	Organic acids and derivatives	Carboxylic acids and derivatives	Amino acids, peptides, and analogues	504969	11777.1	0	18065.7
7.77_383.1126m/z	Naringenin 5-rhamnoside	C21H22O9	7.7747	383.113	pos	M+H-2H2O				75.6				31204.9	322.173	317.91	15152.4
5.85_639.1921m/z	6''-Acetylapiin	C28H30O15	5.85333	639.192	pos	M+CH3OH+H				75.6				0	0	59127.2	0
10.91_319.2269m/z	17,18-Dihydroxyeicosa-5,8,11,14-tetraenoic acid	C20H32O4	10.9147	319.227	pos	M+H-H2O	16061120	XYDVGNAQQFWZEF-JPURVOHMSA-N	CCC(C(C/C=C\C/C=C\C/C=C\C/C=C\CCCC(=O)O)O)O	75.5	Lipids and lipid-like molecules	Fatty Acyls	Eicosanoids	6745.87	181.039	4698.55	504.554
12.17_240.2323m/z	Humulol	C15H26O	12.1703	240.232	pos	M+NH4	14093951	ZLMAVMBYWKVCLV-IMWXLZLDSA-N	C/C/1=C\CC(/C=C/CC(CCC1)(C)O)(C)C	75.5	Lipids and lipid-like molecules	Prenol lipids	Sesquiterpenoids	26813	5460.8	44373.2	39277.1
7.28_329.0657m/z	Xanthotoxol glucoside	C17H16O9	7.27882	329.066	pos	M+H-2H2O	13846551	CXQMYXUCGMYFCD-UHFFFAOYSA-N	C1=CC(=O)OC2=C(C3=C(C=CO3)C=C21)OC4C(C(C(C(O4)CO)O)O)O	75.5	Phenylpropanoids and polyketides	Coumarins and derivatives	Coumarin glycosides	2336.7	0	25309.6	21182.5
8.81_346.3315m/z	Polyoxyethylene 40 monostearate	C20H40O3	8.81357	346.332	pos	M+NH4				75.5				147297	235135	38831.4	179155
8.24_525.1395m/z	Pieceid-2''-O-gallate	C27H26O12	8.23583	525.139	pos	M+H-H2O				75.4				159418	3465.29	65514.6	17748.1
11.06_301.2163m/z	Prostaglandin B1	C20H32O4	11.0611	301.216	pos	M+H-2H2O	5280388	YBHMPNRDOVPQIN-VSOYFRJCSA-N	CCCCC[C@@H](/C=C/C1=C(C(=O)CC1)CCCCCCC(=O)O)O	74.8	Lipids and lipid-like molecules	Fatty Acyls	Eicosanoids	2336.55	743.836	29952.3	411.52
6.03_392.2543m/z	Leu Phe Leu	C21H33N3O4	6.02613	392.254	pos	M+H	7408575	DRWMRVFCKKXHCH-BZSNNMDCSA-N	CC(C)C[C@@H](C(=O)N[C@@H](CC1=CC=CC=C1)C(=O)N[C@@H](CC(C)C)C(=O)O)N	74.8	Organic acids and derivatives	Carboxylic acids and derivatives	Amino acids, peptides, and analogues	480.62	28237.6	0	20890.4
0.80_244.0793m/z	Diphenylsulfoxide	C12H10OS	0.801417	244.079	pos	M+ACN+H				74.7				1623.47	877284	0	768876
6.38_384.1208n	Isolicopyranocoumarin	C21H20O7	6.38147	417.154	pos	M+H, M+CH3OH+H, M+H-H2O	10810040	JHGBGRLHQJNGPN-UHFFFAOYSA-N	CC1(C(CC2=C(O1)C=C3C(=C2OC)C=C(C(=O)O3)C4=C(C=C(C=C4)O)O)O)C	74.6	Phenylpropanoids and polyketides	Isoflavonoids	Hydroxyisoflavonoids	69851.5	7735.65	5756.23	9879.12
7.55_273.0756m/z	Marshrin	C15H14O6	7.55032	273.076	pos	M+H-H2O				74.4				9521.52	0	0	0
8.45_271.0965m/z	Isoimperatorin	C16H14O4	8.44728	271.096	pos	M+H	68081	IGWDEVSBEKYORK-UHFFFAOYSA-N	CC(=CCOC1=C2C=CC(=O)OC2=CC3=C1C=CO3)C	74.4	Phenylpropanoids and polyketides	Coumarins and derivatives	Furanocoumarins	450900	385.187	6486.05	0
5.35_279.0864m/z	6-O-Acetylarbutin	C14H18O8	5.35355	279.086	pos	M+H-2H2O	14542705	XABUTYXAHYMCDK-UHFFFAOYSA-N	CC(=O)OCC1C(C(C(C(O1)OC2=CC=C(C=C2)O)O)O)O	74.2	Organic oxygen compounds	Organooxygen compounds	Carbohydrates and carbohydrate conjugates	332988	3371.72	0	4686.68
10.21_553.1133m/z	Bilobetin	C31H20O10	10.208	553.113	pos	M+H	5315459	IWEIJEPIYMAGTH-UHFFFAOYSA-N	COC1=C(C=C(C=C1)C2=CC(=O)C3=C(C=C(C=C3O2)O)O)C4=C(C=C(C5=C4OC(=CC5=O)C6=CC=C(C=C6)O)O)O	74.2	Phenylpropanoids and polyketides	Flavonoids	Biflavonoids and polyflavonoids	157736	67767.8	269715	85902.2
6.75_287.0549m/z	Scutellarein	C15H10O6	6.75145	287.055	pos	M+H	5281697	JVXZRQGOGOXCEC-UHFFFAOYSA-N	C1=CC(=CC=C1C2=CC(=O)C3=C(O2)C=C(C(=C3O)O)O)O	74.1	Phenylpropanoids and polyketides	Flavonoids	Flavones	43296.6	3914.94	9087.53	3896.4
6.86_262.1074m/z	Marumoside A	C14H19NO6	6.8591	262.107	pos	M+H-2H2O	101794623	FBANEUHXMFEIRO-WBFOWJMUSA-N	C[C@H]1[C@@H]([C@H]([C@H]([C@@H](O1)OC2=CC=C(C=C2)CC(=O)N)O)O)O	73.9	Organic oxygen compounds	Organooxygen compounds	Carbohydrates and carbohydrate conjugates	13225.2	0	0	0
5.65_373.1282m/z	Resveratroloside	C20H22O8	5.64648	373.128	pos	M+H-H2O	5322089	RUOKEYJFAJITAG-CUYWLFDKSA-N	C1=CC(=CC=C1/C=C/C2=CC(=CC(=C2)O)O)O[C@H]3[C@@H]([C@H]([C@@H]([C@H](O3)CO)O)O)O	73.7	Phenylpropanoids and polyketides	Stilbenes	Stilbene glycosides	8838.44	0	157764	1348.67
8.01_287.0549m/z	kaempferol	C15H10O6	8.01032	287.055	pos	M+H	5280863	IYRMWMYZSQPJKC-UHFFFAOYSA-N	C1=CC(=CC=C1C2=C(C(=O)C3=C(C=C(C=C3O2)O)O)O)O	73.7	Phenylpropanoids and polyketides	Flavonoids	Flavones	30400.4	4819.46	14928.2	4736.25
5.42_380.2181m/z	Phe Thr Ile	C19H29N3O5	5.41863	380.218	pos	M+H	145456281	HJDZMPFEXINXLO-QPHKQPEJSA-N	CC[C@H](C)[C@@H](C(=O)N[C@@H]([C@@H](C)O)C(=O)N[C@@H]([C@@H](C)CC)C(=O)O)N	73.7	Organic acids and derivatives	Carboxylic acids and derivatives	Amino acids, peptides, and analogues	0	30185.6	0	13597.8
5.56_360.2129m/z	Asp Ile Leu	C16H29N3O6	5.55697	360.213	pos	M+H	145454468	HOBNTSHITVVNBN-ZPFDUUQYSA-N	CC[C@H](C)[C@@H](C(=O)N[C@@H](CC(C)C)C(=O)O)NC(=O)[C@H](CC(=O)O)N	73.6	Organic acids and derivatives	Carboxylic acids and derivatives	Amino acids, peptides, and analogues	0	18759.9	0	6084.19
0.69_342.1394m/z	N-Acetyl-a-neuraminic acid	C11H19NO9	0.68735	342.139	pos	M+CH3OH+H	444885	SQVRNKJHWKZAKO-YRMXFSIDSA-N	CC(=O)N[C@@H]1[C@H](C[C@@](O[C@H]1[C@@H]([C@@H](CO)O)O)(C(=O)O)O)O	73.5	Organic oxygen compounds	Organooxygen compounds	Carbohydrates and carbohydrate conjugates	252602	0	0	0
5.24_380.2178m/z	Thr Ile Phe	C19H29N3O5	5.23902	380.218	pos	M+H	145456281	HJDZMPFEXINXLO-QPHKQPEJSA-N	CC[C@H](C)[C@@H](C(=O)N[C@@H]([C@@H](C)O)C(=O)N[C@@H]([C@@H](C)CC)C(=O)O)N	73.3	Organic acids and derivatives	Carboxylic acids and derivatives	Amino acids, peptides, and analogues	0	20485.7	0	16424.4
4.22_309.0970m/z	Secodihydro-hydramicromelin B	C15H18O8	4.22478	309.097	pos	M+H-H2O	45360164	BNLUQONOBPMVBG-UHFFFAOYSA-N	CC1(C(C(OC1=O)C2=C(C=C(C(=C2)CCC(=O)O)O)OC)O)O	73.3	Phenylpropanoids and polyketides	Phenylpropanoic acids		53686.4	1591.44	0	5961.83
0.63_156.0769m/z	D-Histidine	C6H9N3O2	0.628467	156.077	pos	M+H	71083	HNDVDQJCIGZPNO-RXMQYKEDSA-N	C1=C(NC=N1)C[C@H](C(=O)O)N	73.2	Organic acids and derivatives	Carboxylic acids and derivatives	Amino acids, peptides, and analogues	652757	885.236	0	0
7.26_405.1181m/z	Cassiaside	C20H20O9	7.25685	405.118	pos	M+H	164146	SBVZTBIAKFTNIJ-CZNQJBLBSA-N	CC1=CC(=O)C2=C(O1)C=C3C=CC=C(C3=C2O)O[C@H]4[C@@H]([C@H]([C@@H]([C@H](O4)CO)O)O)O	73.1	Organoheterocyclic compounds	Naphthopyrans	Naphthopyranones	0	0	24806.3	0
12.14_254.2479m/z	Obscuraminol B	C16H31NO	12.1437	254.248	pos	M+H	101101125	WQUFOQOJRNRZNB-JVSIQZEQSA-N	C[C@@H]([C@@H](CCC/C=C\CCCCCCC=C)O)N	73.1	Organic nitrogen compounds	Organonitrogen compounds	Amines	27409.1	5389.07	45968.8	40278.2
4.86_202.1340m/z	Tryptamine	C10H12N2	4.8643	202.134	pos	M+ACN+H	1150	APJYDQYYACXCRM-UHFFFAOYSA-N	C1=CC=C2C(=C1)C(=CN2)CCN	72.9	Organoheterocyclic compounds	Indoles and derivatives	Tryptamines and derivatives	0	0	19158	0
8.22_287.0549m/z	Pratenol B	C15H12O7	8.22497	287.055	pos	M+H-H2O	101641113	WKBLWDNPQQYILN-WZUFQYTHSA-N	C1C(=CC2=C(O1)C=C(C=C2)O)/C(=C/C(=O)O)/C(=O)CC(=O)O	72.7	Organoheterocyclic compounds	Benzopyrans	1-benzopyrans	13444.4	2025.58	1357.49	449.319
5.95_477.1393m/z	Picroside II	C23H28O13	5.94775	477.139	pos	M+H-2H2O	6440892	XZGPUOQGERGURE-LUVHZPKESA-N	C1=CC=C(C=C1)/C=C/C(=O)OC[C@@H]2[C@H]([C@@H]([C@H]([C@@H](O2)O[C@H]3[C@H]4[C@@H](C=CO3)[C@@H]([C@H]5[C@@]4(O5)CO)O)O)O)O	72.4	Phenylpropanoids and polyketides	Cinnamic acids and derivatives	Cinnamic acid esters	125952	1101.8	0	0
6.58_146.0601m/z	Inosine	C9H7NO	6.5758	146.06	pos	M+H	135398641	UGQMRVRMYYASKQ-KQYNXXCUSA-N	C1=NC2=C(C(=O)N1)N=CN2[C@H]3[C@@H]([C@@H]([C@H](O3)CO)O)O	72.3	Nucleosides, nucleotides, and analogues	Purine nucleosides		26648.6	7771.62	34331.4	11793.1
7.30_277.1071m/z	NIVALENOL	C15H20O7	7.30357	277.107	pos	M+H-2H2O	5284433	UKOTXHQERFPCBU-XBXCNEFVSA-N	CC1=C[C@@H]2[C@]([C@@H](C1=O)O)([C@]3([C@@H]([C@H]([C@H]([C@@]34CO4)O2)O)O)C)CO	72.3	Lipids and lipid-like molecules	Prenol lipids	Sesquiterpenoids	241137	0	0	0
7.53_457.1130m/z	3',4',5-Trihydroxy-3,7-dimethoxyflavone 5-glucoside	C23H24O12	7.5262	457.113	pos	M+H-2H2O				72.1				78983.8	0	0	0
5.24_336.1917m/z	Leu Gly Phe	C17H25N3O4	5.23902	336.192	pos	M+H	6994674	KEVYYIMVELOXCT-KBPBESRZSA-N	CC(C)C[C@@H](C(=O)NCC(=O)N[C@@H](CC1=CC=CC=C1)C(=O)O)N	72.1	Organic acids and derivatives	Carboxylic acids and derivatives	Amino acids, peptides, and analogues	0	25789.9	0	22176.9
5.42_554.2234m/z	4'-O-trans-p-Coumaroylmussaenoside	C26H32O12	5.41863	554.223	pos	M+NH4	91895460	FGEXYXJRRAKWIL-KPFFXFJGSA-N	C[C@@]1(CC[C@H]2[C@@H]1[C@@H](OC=C2C(=O)OC)O[C@H]3[C@@H]([C@H]([C@@H]([C@H](O3)CO)OC(=O)/C=C/C4=CC=C(C=C4)O)O)O)O	72.1	Lipids and lipid-like molecules	Prenol lipids	Terpene glycosides	52066.2	0	1980.94	0
0.77_282.1182m/z	N-(1-Deoxy-1-fructosyl)threonine	C10H19NO8	0.774783	282.118	pos	M+H	131752246	JUBGLICOZRKBCO-KNWYLTHMSA-N	CC([C@@H](C(=O)O)NCC1([C@H]([C@@H]([C@H](O1)CO)O)O)O)O	72	Organic oxygen compounds	Organooxygen compounds	Carbohydrates and carbohydrate conjugates	114960	2212.57	0	773.229
4.77_164.0706m/z	coumarin	C9H6O2	4.76532	164.071	pos	M+NH4	323	ZYGHJZDHTFUPRJ-UHFFFAOYSA-N	C1=CC=C2C(=C1)C=CC(=O)O2	71.8	Phenylpropanoids and polyketides	Coumarins and derivatives		39158	15401.4	8927.19	37663.6
5.56_211.1442m/z	Cyclo(Leu-Pro)	C11H18N2O2	5.55697	211.144	pos	M+H	7074739	SZJNCZMRZAUNQT-IUCAKERBSA-N	CC(C)C[C@H]1C(=O)N2CCC[C@H]2C(=O)N1	71.7	Organic acids and derivatives	Carboxylic acids and derivatives	Amino acids, peptides, and analogues	2907.41	26350.1	2112.53	27030.6
7.47_415.1388m/z	4'-O-Methylglucoliquiritigenin	C22H24O9	7.46707	415.139	pos	M+H-H2O	75614571	SBKZROAYFHGDCO-UHFFFAOYSA-N	COC1=CC=C(C=C1)C2CC(=O)C3=C(O2)C=C(C=C3)OC4C(C(C(C(O4)CO)O)O)O	71.6	Phenylpropanoids and polyketides	Flavonoids	Flavonoid glycosides	25464.5	0	0	0
9.38_330.1829n	meso-dihydroguaiaretic acid	C20H26O4	9.38202	331.19	pos	M+H, M+Na	476856	ADFOLUXMYYCTRR-OKILXGFUSA-N	C[C@H](CC1=CC(=C(C=C1)O)OC)[C@@H](C)CC2=CC(=C(C=C2)O)OC	71.5	Lignans, neolignans and related compounds	Dibenzylbutane lignans		14369.6	1958.76	4822.13	2391.83
8.29_241.0860m/z	Goniodiol 8-acetate	C15H16O5	8.2869	241.086	pos	M+H-2H2O	10945698	VWWLVBSOTCIVHI-VHDGCEQUSA-N	CC(=O)O[C@H](C1=CC=CC=C1)[C@H]([C@H]2CC=CC(=O)O2)O	71.3	Benzenoids	Benzene and substituted derivatives	Benzyloxycarbonyls	27153.7	0	189.987	0
10.48_329.1020m/z	Rutalinium	C16H20NO4+	10.4787	329.102	pos	M+K	176456	YNZXAOOXQYAYLT-UHFFFAOYSA-O	CC1(C(CC2=C(C3=C(C=CC(=C3)O)[N+](=C2O1)C)OC)O)C	71.2	Organoheterocyclic compounds	Quinolines and derivatives	Quinolones and derivatives	89685.8	20864.6	131710	23274
6.67_417.1180m/z	Catechin 3'-glucoside	C21H24O11	6.66758	417.118	pos	M+H-2H2O				71				31411.9	0	75.2228	0
6.23_501.1393m/z	Vaccinoside	C25H28O13	6.23188	501.139	pos	M+H-2H2O	56776351	WJPRKOJNQIZCGY-OZOLURDPSA-N	C1=C[C@@]([C@@H]2[C@H]1C(=CO[C@H]2O[C@H]3[C@@H]([C@H]([C@@H]([C@H](O3)CO)O)O)O)C(=O)O)(COC(=O)/C=C/C4=CC=C(C=C4)O)O	70.9	Lipids and lipid-like molecules	Prenol lipids	Terpene glycosides	55819.6	4020.25	0	9598.91
6.81_515.1550m/z	4'-Hydroxyacetophenone 4'-[4-hydroxybenzoyl-(->5)-apiosyl-(1->2)-glucoside]	C26H30O13	6.81263	515.155	pos	M+H-2H2O	85277745	MQJMZJDOAGOKBY-UHFFFAOYSA-N	CC(=O)C1=CC=C(C=C1)OC2C(C(C(C(O2)CO)O)O)OC3C(C(CO3)(COC(=O)C4=CC=C(C=C4)O)O)O	70.9	Organic oxygen compounds	Organooxygen compounds	Carbohydrates and carbohydrate conjugates	170474	3760.96	0	125.463
1.27_293.1475n	N-(1-Deoxy-1-fructosyl)leucine	C12H23NO7	1.26668	294.155	pos	M+H-H2O, M+H	131752244	KGTRBDVOUPALMB-PPNLDZOPSA-N	CC(C)C[C@@H](C(=O)O)NCC1([C@H]([C@@H]([C@H](O1)CO)O)O)O	70.6	Organic acids and derivatives	Carboxylic acids and derivatives	Amino acids, peptides, and analogues	168163	870204	0	763947
1.59_219.1341m/z	Ser Leu	C9H18N2O4	1.58963	219.134	pos	M+H	7015695	NFDYGNFETJVMSE-BQBZGAKWSA-N	CC(C)C[C@@H](C(=O)O)NC(=O)[C@H](CO)N	70.4	Organic acids and derivatives	Carboxylic acids and derivatives	Amino acids, peptides, and analogues	1119.17	83283.5	0	62339.4
5.53_408.2130m/z	Phe Glu Leu	C20H29N3O6	5.53235	408.213	pos	M+H	145457205	KJJROSNFBRWPHS-JYJNAYRXSA-N	CC(C)C[C@@H](C(=O)O)NC(=O)[C@H](CCC(=O)O)NC(=O)[C@H](CC1=CC=CC=C1)N	70.3	Organic acids and derivatives	Carboxylic acids and derivatives	Amino acids, peptides, and analogues	0	35961.9	0	22082.9
9.42_262.1438m/z	Ligusticumic acid-methylester	C13H16O3	9.42088	262.144	pos	M+ACN+H	11085323	QTUYJWKFWYJIOM-UHFFFAOYSA-N	CCCCC(=O)C1=CC=CC=C1C(=O)OC	70.3	Organic oxygen compounds	Organooxygen compounds	Carbonyl compounds	0	0	11352	0
7.29_474.1526n	Pueroside C	C24H26O10	7.29122	457.149	pos	M+H-H2O, M+H	21629871	UAZRROBGAZKAFE-VOASFPSXSA-N	COC1=CC2=C(CC(/C(=C\C(=O)O2)/C3=CC=C(C=C3)O)O[C@H]4[C@@H]([C@H]([C@@H]([C@H](O4)CO)O)O)O)C=C1	70.1	Organic oxygen compounds	Organooxygen compounds	Carbohydrates and carbohydrate conjugates	69642.3	0	0	0
14.27_446.3762n	13'-Hydroxy-alpha-tocopherol	C29H50O3	14.2662	429.373	pos	M+H-H2O, M+H	53481465	URYLCCKXLNXSRS-XIRVVSDESA-N	CC1=C(C2=C(CC[C@@](O2)(C)CCC[C@H](C)CCC[C@H](C)CCCC(C)CO)C(=C1O)C)C	69.9	Lipids and lipid-like molecules	Prenol lipids	Quinone and hydroquinone lipids	2.86649e+06	1.89228e+06	81827.3	49033.4
8.40_303.0852m/z	Hematoxylin	C16H14O6	8.3972	303.085	pos	M+H	442514	WZUVPPKBWHMQCE-XJKSGUPXSA-N	C1C2=CC(=C(C=C2[C@H]3[C@@]1(COC4=C3C=CC(=C4O)O)O)O)O	69.6	Organoheterocyclic compounds	Benzopyrans	1-benzopyrans	40702.5	913.079	0	0
0.83_186.0763m/z	N-Acetyl-D-Glucosamine	C8H15NO6	0.832433	186.076	pos	M+H-2H2O	439174	OVRNDRQMDRJTHS-RTRLPJTCSA-N	CC(=O)N[C@@H]1[C@H]([C@@H]([C@H](OC1O)CO)O)O	69.6	Organic oxygen compounds	Organooxygen compounds	Carbohydrates and carbohydrate conjugates	50446.2	9853.01	0	7996.76
10.60_305.2111m/z	16-Oxoandrostenediol	C19H28O3	10.5971	305.211	pos	M+H				69.6				10340.7	460.221	10638.4	690.523
0.84_407.1161m/z	Pentyl glucosinolate	C12H23NO9S2	0.842117	407.116	pos	M+NH4				69.5				0	2.60014e+06	0	79928.4
6.69_235.0601m/z	3,4,5-trihydroxy-6-phenoxyoxane-2-carboxylic acid	C12H14O7	6.69237	235.06	pos	M+H-2H2O	3520575	WVHAUDNUGBNUDZ-UHFFFAOYSA-N	C1=CC=C(C=C1)OC2C(C(C(C(O2)C(=O)O)O)O)O	69.5	Organic oxygen compounds	Organooxygen compounds	Carbohydrates and carbohydrate conjugates	1.33193e+06	6690.4	307.558	0
4.20_300.1918m/z	Pro Leu Ala	C14H25N3O4	4.20295	300.192	pos	M+H	5478845	BYXHQQCXAJARLQ-ZLUOBGJFSA-N	C[C@@H](C(=O)N[C@@H](C)C(=O)N[C@@H](C)C(=O)O)N	69.4	Organic acids and derivatives	Carboxylic acids and derivatives	Amino acids, peptides, and analogues	0	65078.8	0	14981.6
7.58_233.0809m/z	Goniotriol	C13H14O5	7.5841	233.081	pos	M+H-H2O	125950	AWCDBKHWVKLXEE-WKSBVSIWSA-N	C1=CC=C(C=C1)[C@H]([C@H]([C@H]2[C@H](C=CC(=O)O2)O)O)O	69.3	Organoheterocyclic compounds	Pyrans	Pyranones and derivatives	14899.9	1807.58	38.4618	0
2.15_328.1392m/z	Gastrodin	C13H18O7	2.14908	328.139	pos	M+ACN+H	115067	PUQSUZTXKPLAPR-UJPOAAIJSA-N	C1=CC(=CC=C1CO)O[C@H]2[C@@H]([C@H]([C@@H]([C@H](O2)CO)O)O)O	69.3	Organic oxygen compounds	Organooxygen compounds	Carbohydrates and carbohydrate conjugates	30463.1	165364	0	136809
5.79_211.0966m/z	Loganetin	C11H16O5	5.78565	211.097	pos	M+H-H2O	10466307	XWOHZIIPBYAMJX-KHBMLBSESA-N	C[C@H]1[C@H](C[C@H]2[C@@H]1[C@@H](OC=C2C(=O)OC)O)O	69.2	Lipids and lipid-like molecules	Prenol lipids	Monoterpenoids	32503.2	813.292	48930.5	7109.94
0.91_436.0831n	methyl 2-[2-(3-chlorophenyl)-6-(furan-2-carbonylamino)quinolin-4-yl]oxyacetate	C23H17ClN2O5	0.9091	437.09	pos	M+H-H2O, M+H				69.2				0	690388	0	0
4.73_207.0653m/z	Lawsone	C10H6O3	4.7298	207.065	pos	M+CH3OH+H	6755	WVCHIGAIXREVNS-UHFFFAOYSA-N	C1=CC=C2C(=C1)C(=CC(=O)C2=O)O	69.2	Benzenoids	Naphthalenes	Naphthoquinones	51511.7	2342.81	1000.9	4183.46
12.14_268.2635m/z	(Z)-9-Cycloheptadecen-1-one	C17H30O	12.1437	268.264	pos	M+NH4	11334208	ZKVZSBSZTMPBQR-OWOJBTEDSA-N	C1CCC/C=C/CCCCCCCC(=O)CCC1	69.1	Organic oxygen compounds	Organooxygen compounds	Carbonyl compounds	28794.1	2325.6	47846.4	42099.8
13.09_262.2296n	2-(5,8-Tetradecadienyl)cyclobutanone	C18H30O	13.0878	280.263	pos	M+H, M+NH4, M+H-H2O	101929256	DAVBRGLWAOXZKF-AVQMFFATSA-N	CCCCC/C=C/C/C=C/CCCCC1CCC1=O	69	Organic oxygen compounds	Organooxygen compounds	Carbonyl compounds	3.20469e+06	3.85819e+06	1.08806e+06	3.08603e+06
0.74_106.0503m/z	L-Serine	C3H7NO3	0.7356	106.05	pos	M+H				68.8				408877	920.807	9227.63	670.455
1.16_136.0619m/z	Adenine	C5H5N5	1.15703	136.062	pos	M+H	190	GFFGJBXGBJISGV-UHFFFAOYSA-N	C1=NC2=NC=NC(=C2N1)N	68.8	Organoheterocyclic compounds	Imidazopyrimidines	Purines and purine derivatives	297423	479107	0	886789
5.40_360.2129m/z	Asp Leu Leu	C16H29N3O6	5.3968	360.213	pos	M+H	145456409	HFBCHNRFRYLZNV-GUBZILKMSA-N	CC(C)C[C@@H](C(=O)N[C@@H](CCC(=O)O)C(=O)N[C@@H](CC(=O)O)C(=O)O)N	68.8	Organic acids and derivatives	Peptidomimetics	Hybrid peptides	0	17445.9	0	7208.91
7.43_515.1550m/z	Liquiritin apioside	C26H30O13	7.43292	515.155	pos	M+H-2H2O	10076238	FTVKHUHJWDMWIR-DWMQJYMWSA-N	C1[C@H](OC2=C(C1=O)C=CC(=C2)O)C3=CC=C(C=C3)O[C@H]4[C@@H]([C@H]([C@@H]([C@H](O4)CO)O)O)O[C@H]5[C@@H]([C@](CO5)(CO)O)O	68.6	Phenylpropanoids and polyketides	Flavonoids	Flavonoid glycosides	20006.4	631.024	0	0
4.73_304.1657m/z	Valyl-Tryptophan	C16H21N3O3	4.7298	304.166	pos	M+H	168182	LZDNBBYBDGBADK-KBPBESRZSA-N	CC(C)[C@@H](C(=O)N[C@@H](CC1=CNC2=CC=CC=C21)C(=O)O)N	68.5	Organic acids and derivatives	Carboxylic acids and derivatives	Amino acids, peptides, and analogues	0.00817919	31601.7	2.28998	39616.3
1.15_199.0846n	2-Acetyl-1,5,6,7-tetrahydro-6-hydroxy-7-(hydroxymethyl)-4H-azepine-4-one	C9H13NO4	1.14637	182.081	pos	M+H, M+NH4, M+H-H2O				68.4				158254	295831	0	292473
5.30_331.0813m/z	Furocoumarinic acid glucoside	C17H18O9	5.29603	331.081	pos	M+H-2H2O				68.3				15714.2	0	0	0
8.29_599.1398m/z	Chamaemeloside	C27H28O14	8.2869	599.14	pos	M+Na				68.2				235230	61811.6	0	0
10.16_460.2694m/z	Cinobufagin	C26H34O6	10.1562	460.269	pos	M+NH4	11969542	SCULJPGYOQQXTK-OLRINKBESA-N	CC(=O)O[C@@H]1[C@@H]([C@]2(CC[C@H]3[C@H]([C@@]24[C@@H]1O4)CC[C@H]5[C@@]3(CC[C@@H](C5)O)C)C)C6=COC(=O)C=C6	68.2	Lipids and lipid-like molecules	Steroids and steroid derivatives	Steroid lactones	11318.9	272574	512674	603435
7.13_299.0913m/z	Pendulone	C17H16O6	7.1273	299.091	pos	M+H-H2O	5320464	SHZOHJDZQPQBSW-UHFFFAOYSA-N	COC1=C(C(=O)C(=CC1=O)C2CC3=C(C=C(C=C3)O)OC2)OC	68.2	Phenylpropanoids and polyketides	Isoflavonoids	Isoflavanquinones	84280.6	6826.78	236.359	0
4.93_359.2287m/z	Asn Leu Ile	C16H30N4O5	4.93153	359.229	pos	M+H	145454171	BZWRLDPIWKOVKB-ZPFDUUQYSA-N	CC[C@H](C)[C@@H](C(=O)O)NC(=O)[C@H](CC(C)C)NC(=O)[C@H](CC(=O)N)N	68.2	Organic acids and derivatives	Carboxylic acids and derivatives	Amino acids, peptides, and analogues	0	35419.9	0	15101.9
7.23_369.0970m/z	Cleomiscosin B	C20H18O8	7.2318	369.097	pos	M+H-H2O	156875	XGADTAYOFHOFIW-NVXWUHKLSA-N	COC1=C(C=CC(=C1)[C@@H]2[C@H](OC3=C(C=C4C=CC(=O)OC4=C3O2)OC)CO)O	68.1	Lignans, neolignans and related compounds	Coumarinolignans		289.209	0	1656.76	16372.6
4.03_367.1500m/z	Tetrahydropentoxyline	C17H22N2O7	4.0294	367.15	pos	M+H				68				98794.9	14640.9	0	6158.12
7.19_334.2951m/z	MG(i-15:0/0:0/0:0)	C18H36O4	7.18633	334.295	pos	M+NH4	51543808	CALSYPDGGJMMDZ-QGZVFWFLSA-N	CC(C)CCCCCCCCCCCC(=O)OC[C@@H](CO)O	67.9	Lipids and lipid-like molecules	Glycerolipids	Monoradylglycerols	4466.07	12190.5	2028.08	4584.31
9.81_318.2195n	Phytocassane C	C20H30O3	9.8129	301.216	pos	M+H-H2O, M+H				67.6				49426	2372.79	118583	5476.27
10.36_268.2271m/z	Clareolide	C16H26O2	10.363	268.227	pos	M+NH4	929262	IMKJGXCIJJXALX-SHUKQUCYSA-N	C[C@]12CCCC([C@@H]1CC[C@@]3([C@@H]2CC(=O)O3)C)(C)C	67.5	Organoheterocyclic compounds	Naphthofurans		5061.49	5621.59	5047.09	5816.84
6.96_410.1445m/z	6-({3-[(1E)-but-1-en-1-yl]-1-oxo-1H-isochromen-5-yl}oxy)-3,4,5-trihydroxyoxane-2-carboxylic acid	C19H20O9	6.96348	410.145	pos	M+NH4				67.5				33641.1	0	0	0
4.26_302.2074m/z	Leu Leu Gly	C14H27N3O4	4.25857	302.207	pos	M+H	7019089	YOKVEHGYYQEQOP-QWRGUYRKSA-N	CC(C)C[C@@H](C(=O)N[C@@H](CC(C)C)C(=O)NCC(=O)O)N	67.4	Organic acids and derivatives	Carboxylic acids and derivatives	Amino acids, peptides, and analogues	0	25109.7	0	1911.02
4.49_345.2131m/z	Val Asn Ile	C15H28N4O5	4.49405	345.213	pos	M+H	145458953	VHRLUTIMTDOVCG-PEDHHIEDSA-N	CC[C@H](C)[C@@H](C(=O)N[C@@H]([C@@H](C)CC)C(=O)O)NC(=O)[C@H](C(C)C)N	67.4	Organic acids and derivatives	Carboxylic acids and derivatives	Amino acids, peptides, and analogues	0	52339.6	1772.89	24844.1
5.83_549.1943m/z	Lucidumoside C	C27H36O14	5.834	549.194	pos	M+H-2H2O	10793430	RDLNVCALMXCDOJ-QUVQPCEGSA-N	CCOC(COC(=O)C[C@@H]\1C(=CO[C@H](/C1=C/C)O[C@H]2[C@@H]([C@H]([C@@H]([C@H](O2)CO)O)O)O)C(=O)OC)C3=CC(=C(C=C3)O)O	67.4	Lipids and lipid-like molecules	Prenol lipids	Terpene glycosides	0	0	157577	0
4.58_315.0974m/z	N-gamma-Glutamyl-S-propylcysteine	C11H20N2O5S	4.58467	315.097	pos	M+Na				67.4				42387.6	0	0	0
5.81_267.0863m/z	Helicid	C13H16O7	5.80882	267.086	pos	M+H-H2O	12896796	OLZAGZCCJJBKNZ-SYLRKERUSA-N	C1=CC(=CC=C1C=O)O[C@H]2[C@@H]([C@@H]([C@@H]([C@H](O2)CO)O)O)O	67.3	Organic oxygen compounds	Organooxygen compounds	Carbohydrates and carbohydrate conjugates	31478.8	0	956.804	0
9.65_317.2112m/z	15-deoxy-12,14-Prostaglandin A2	C20H28O3	9.64912	317.211	pos	M+H	166639232	BHHHGDAJJMEHST-QZSCROBISA-N	CCCCC/C=C/C=C/1\C=CC(=O)[C@@H]1C/C=C/CCCC(=O)O	67.3	Lipids and lipid-like molecules	Fatty Acyls	Eicosanoids	26976.2	874.346	6010.01	826.149
6.33_249.0758m/z	p-Cresol glucuronide	C13H16O7	6.33387	249.076	pos	M+H-2H2O	154035	JPAUCQAJHLSMQW-XPORZQOISA-N	CC1=CC=C(C=C1)O[C@H]2[C@@H]([C@H]([C@@H]([C@H](O2)C(=O)O)O)O)O	67.2	Organic oxygen compounds	Organooxygen compounds	Carbohydrates and carbohydrate conjugates	16521.7	171.472	545.779	406.35
8.85_390.3578m/z	MG(i-19:0/0:0/0:0)	C22H44O4	8.8518	390.358	pos	M+NH4	94840612	WWTTXMMZHOBTAM-OAQYLSRUSA-N	CCCCCCCCCCCCCCCCCCC(=O)OC[C@@H](CO)O	67	Lipids and lipid-like molecules	Glycerolipids	Monoradylglycerols	13568.9	28634.1	1424.81	15779.9
5.94_461.1443m/z	Mycophenolic acid glucuronide	C23H28O12	5.93627	461.144	pos	M+H-2H2O				67				117955	1352.71	1608.21	706.158
0.76_251.1005n	N-(1-Deoxy-1-fructosyl)alanine	C9H17NO7	0.764933	234.097	pos	M+H-H2O, M+H, M+H-2H2O	131752247	OANCGDPJMNPBDV-BUFOXMIFSA-N	CC(C)[C@@H](C(=O)O)NCC1([C@H]([C@@H]([C@H](O1)CO)O)O)O	66.9	Organic acids and derivatives	Carboxylic acids and derivatives	Amino acids, peptides, and analogues	649679	4264.88	0	154.041
5.49_487.1592m/z	6-O-p-Methoxycinnamoylcatalpol	C25H30O12	5.48977	487.159	pos	M+H-2H2O	91895358	SYHPDMZDZYFZLU-WEWXOPRLSA-N	COC1=CC=C(C=C1)/C=C/C(=O)O[C@H]2[C@@H]3C=CO[C@H]([C@@H]3[C@@]4([C@H]2O4)CO)O[C@H]5[C@@H]([C@H]([C@@H]([C@H](O5)CO)O)O)O	66.9	Organic oxygen compounds	Organooxygen compounds	Carbohydrates and carbohydrate conjugates	93242.1	2909.13	70806.9	0
1.16_123.0444m/z	4-Hydroxybenzaldehyde	C7H6O2	1.15703	123.044	pos	M+H	126	RGHHSNMVTDWUBI-UHFFFAOYSA-N	C1=CC(=CC=C1C=O)O	66.9	Organic oxygen compounds	Organooxygen compounds	Carbonyl compounds	45021.7	28915.4	0	30065
0.86_152.0569m/z	Guanine	C5H5N5O	0.862233	152.057	pos	M+H	135398634	UYTPUPDQBNUYGX-UHFFFAOYSA-N	C1=NC2=C(N1)C(=O)NC(=N2)N	66.8	Organoheterocyclic compounds	Imidazopyrimidines	Purines and purine derivatives	39963.1	60859.4	0	175871
5.23_401.1596m/z	Cyclointegrin	C21H20O6	5.22722	401.16	pos	M+CH3OH+H				66.8				0	0	98413.4	0
7.24_245.0810m/z	3'-Hydroxyxanthyletin	C14H12O4	7.2442	245.081	pos	M+H	129069558	FMYNVGVODWZNCM-UHFFFAOYSA-N	CC1(C(=CC2=C(O1)C=C3C(=C2)C=CC(=O)O3)O)C	66.8	Phenylpropanoids and polyketides	Coumarins and derivatives	Pyranocoumarins	20773.3	1820.42	0	2901.84
6.58_241.1071m/z	1,1'-(Tetrahydro-6a-hydroxy-2,3a,5-trimethylfuro[2,3-d]-1,3-dioxole-2,5-diyl)bis-ethanone	C12H18O6	6.5758	241.107	pos	M+H-H2O	193527	TXTNKDRGVWKECN-UHFFFAOYSA-N	CC(=O)C1(CC2(C(O1)(OC(O2)(C)C(=O)C)C)O)C	66.8	Organic oxygen compounds	Organooxygen compounds	Ethers	0.0580579	0	20505.2	0
5.06_291.0863m/z	cis-melilotoside	C15H18O8	5.05645	291.086	pos	M+H-2H2O	5280759	GVRIYIMNJGULCZ-ZMKUSUEASA-N	C1=CC=C(C(=C1)/C=C/C(=O)O)O[C@H]2[C@@H]([C@H]([C@@H]([C@H](O2)CO)O)O)O	66.8	Organic oxygen compounds	Organooxygen compounds	Carbohydrates and carbohydrate conjugates	131154	3045.04	78559.8	6326.27
5.69_430.2437m/z	Abscisic alcohol 11-glucoside	C21H32O8	5.69367	430.244	pos	M+NH4	131752697	PMGQCIZHFNQTAO-YTEPGLGFSA-N	CC1=CC(=O)CC(C1(/C=C/C(=C/COC2C(C(C(C(O2)CO)O)O)O)/C)O)(C)C	66.6	Lipids and lipid-like molecules	Prenol lipids	Terpene glycosides	0	58293.8	0	119095
7.32_301.0342m/z	myricetin	C15H10O8	7.31578	301.034	pos	M+H-H2O	5281672	IKMDFBPHZNJCSN-UHFFFAOYSA-N	C1=C(C=C(C(=C1O)O)O)C2=C(C(=O)C3=C(C=C(C=C3O2)O)O)O	66.6	Phenylpropanoids and polyketides	Flavonoids	Flavones	18510.9	3943.03	0	1406.98
6.69_277.1434m/z	8-epi-Chlorajapolide F	C16H20O4	6.69237	277.143	pos	M+H	131676071	NIDGSFJPVYDWLY-NEQHGRNDSA-N	CC1=C2C[C@H]3C(=C)[C@H]4C[C@H]4[C@@]3([C@@H]([C@]2(OC1=O)OC)O)C	66.6	Lipids and lipid-like molecules	Prenol lipids	Terpene lactones	2581.94	0	17437.1	0
7.93_274.2740m/z	(E)-2-Octen-1-ol	C8H16O	7.92638	274.274	pos	2M+NH4	5318599	AYQPVPFZWIQERS-VOTSOKGWSA-N	CCCCC/C=C/CO	66.5	Lipids and lipid-like molecules	Fatty Acyls	Fatty alcohols	3.62374e+06	3.84743e+06	2.17361e+06	3.43561e+06
5.25_344.2544m/z	Val Ile Ile	C17H33N3O4	5.25165	344.254	pos	M+H	145458953	VHRLUTIMTDOVCG-PEDHHIEDSA-N	CC[C@H](C)[C@@H](C(=O)N[C@@H]([C@@H](C)CC)C(=O)O)NC(=O)[C@H](C(C)C)N	66.5	Organic acids and derivatives	Carboxylic acids and derivatives	Amino acids, peptides, and analogues	0	176864	0	125249
5.18_386.1214n	1-O-Sinapoylglucose	C17H22O10	5.18195	369.118	pos	M+H-H2O, M+H				66				67057.6	0	0	0
4.55_359.2287m/z	Val Gln Leu	C16H30N4O5	4.54925	359.229	pos	M+H	145458902	VFOHXOLPLACADK-GVXVVHGQSA-N	CC(C)C[C@@H](C(=O)O)NC(=O)[C@H](CCC(=O)N)NC(=O)[C@H](C(C)C)N	66	Organic acids and derivatives	Carboxylic acids and derivatives	Amino acids, peptides, and analogues	0	44123.2	0	5502.98
2.25_306.1184m/z	Dianthoside	C12H16O8	2.24707	306.118	pos	M+NH4	5316639	YGSIRXHFAUFUEJ-GPTQDWHKSA-N	CC1=C(C(=O)C=CO1)O[C@H]2[C@@H]([C@H]([C@@H]([C@H](O2)CO)O)O)O	66	Organic oxygen compounds	Organooxygen compounds	Carbohydrates and carbohydrate conjugates	270428	7038.73	0	4570.81
7.46_275.0913m/z	trans-Grandmarin	C15H16O6	7.45567	275.091	pos	M+H-H2O	14213970	RRUHFAXVNXSPNG-UHFFFAOYSA-N	CC1(C(C(C2=C3C(=C(C=C2O1)OC)C=CC(=O)O3)O)O)C	66	Phenylpropanoids and polyketides	Coumarins and derivatives	Pyranocoumarins	9512.18	212.52	0	908.44
7.69_385.1283m/z	Isorhapontin	C21H24O9	7.69125	385.128	pos	M+H-2H2O	5281716	KLPUXMNQDCUPNO-DXKBKAGUSA-N	COC1=C(C=CC(=C1)/C=C/C2=CC(=CC(=C2)O[C@H]3[C@@H]([C@H]([C@@H]([C@H](O3)CO)O)O)O)O)O	65.9	Phenylpropanoids and polyketides	Stilbenes	Stilbene glycosides	40634.6	3318.38	1320.58	20390.5
7.80_277.0706m/z	6-(3-ethenyl-5-hydroxyphenoxy)-3,4,5-trihydroxyoxane-2-carboxylic acid	C14H16O8	7.79892	277.071	pos	M+H-2H2O	131832860	SUAFKEIYLAQXIP-UHFFFAOYSA-N	CCC1=C(C=C(C=C1)OC2C(C(C(C(O2)C(=O)O)O)O)O)O	65.8	Organic oxygen compounds	Organooxygen compounds	Carbohydrates and carbohydrate conjugates	9413.8	0	0	0
10.54_319.2270m/z	Hispanolone	C20H30O3	10.543	319.227	pos	M+H	5458747	UVKYPKNCQJIGKV-PEFDPPPMSA-N	C[C@@H]1C(=O)C[C@@H]2[C@@]([C@]1(CCC3=COC=C3)O)(CCCC2(C)C)C	65.5	Lipids and lipid-like molecules	Prenol lipids	Diterpenoids	7176.69	180.926	5511.24	342.999
4.52_332.2181m/z	Leu Thr Val	C15H29N3O5	4.51523	332.218	pos	M+H	145456529	AIQWYVFNBNNOLU-RHYQMDGZSA-N	C[C@H]([C@@H](C(=O)N[C@@H](C(C)C)C(=O)O)NC(=O)[C@H](CC(C)C)N)O	65.5	Organic acids and derivatives	Carboxylic acids and derivatives	Amino acids, peptides, and analogues	0	98300.8	0	54825.8
5.53_336.1919m/z	Gly Ile Phe	C17H25N3O4	5.53235	336.192	pos	M+H	45279370	FCKPEGOCSVZPNC-WHOFXGATSA-N	CC[C@H](C)[C@@H](C(=O)N[C@@H](CC1=CC=CC=C1)C(=O)O)NC(=O)CN	65.3	Organic acids and derivatives	Carboxylic acids and derivatives	Amino acids, peptides, and analogues	0	17723.2	0	10892
9.49_289.1798m/z	Cibaric acid	C18H28O5	9.4946	289.18	pos	M+H-2H2O	6438613	LFTUCYCUYUJMJB-YXCOHMLOSA-N	C(CCC/C=C\CC(=O)/C=C(/C=C/CCO)\O)CCCC(=O)O	65.2	Lipids and lipid-like molecules	Fatty Acyls	Lineolic acids and derivatives	5503	816.199	0	0
4.40_295.1654m/z	Tyr Ile	C15H22N2O4	4.40323	295.165	pos	M+H	7019110	QJKMCQRFHJRIPU-XDTLVQLUSA-N	CC[C@H](C)[C@@H](C(=O)O)NC(=O)[C@H](CC1=CC=C(C=C1)O)N	65.1	Organic acids and derivatives	Carboxylic acids and derivatives	Amino acids, peptides, and analogues	0	53702.2	0	49801.1
1.86_196.0968m/z	Suberylglycine	C10H17NO5	1.85897	196.097	pos	M+H-2H2O	6453952	HXATVKDSYDWTCX-UHFFFAOYSA-N	C(CCCC(=O)O)CCC(=O)NCC(=O)O	64.9	Organic acids and derivatives	Carboxylic acids and derivatives	Amino acids, peptides, and analogues	52133.2	3597.01	0	0.106308
7.85_271.0601m/z	3,5,6,7-tetrahydroxy-2-phenyl-3,4-dihydro-2H-1-benzopyran-4-one	C15H12O6	7.84562	271.06	pos	M+H-H2O				64.8				89804.1	15450.6	11215.4	15533
14.32_270.2792m/z	Pentadecanol	C15H32O	14.3191	270.279	pos	M+ACN+H	12397	REIUXOLGHVXAEO-UHFFFAOYSA-N	CCCCCCCCCCCCCCCO	64.8	Lipids and lipid-like molecules	Fatty Acyls	Fatty alcohols	29424.4	72342.4	9856.37	35323.3
4.65_298.0969m/z	5'-Methylthioadenosine	C11H15N5O3S	4.65168	298.097	pos	M+H	439176	WUUGFSXJNOTRMR-IOSLPCCCSA-N	CSC[C@@H]1[C@H]([C@H]([C@@H](O1)N2C=NC3=C(N=CN=C32)N)O)O	64.8	Nucleosides, nucleotides, and analogues	5'-deoxyribonucleosides	5'-deoxy-5'-thionucleosides	0	0	36149.8	0
4.80_366.2023m/z	Val Thr Phe	C18H27N3O5	4.79873	366.202	pos	M+H	145459056	HTONZBWRYUKUKC-RCWTZXSCSA-N	C[C@H]([C@@H](C(=O)N[C@@H](C(C)C)C(=O)O)NC(=O)[C@H](C(C)C)N)O	64.6	Organic acids and derivatives	Carboxylic acids and derivatives	Amino acids, peptides, and analogues	0	116057	0	91579.9
14.59_226.1803m/z	trans-3-Oxo-alpha-ionol	C13H20O2	14.5867	226.18	pos	M+NH4	5370052	MDCGEAGEQVMWPE-AATRIKPKSA-N	CC1=CC(=O)CC(C1/C=C/C(C)O)(C)C	64.5	Lipids and lipid-like molecules	Prenol lipids	Sesquiterpenoids	24503.7	20373	7100.14	32949.9
6.50_441.2234m/z	Onetine	C19H29NO8	6.49768	441.223	pos	M+ACN+H	132282057	OCDRLZFZBHZTKQ-NMUBGGKPSA-N	C[C@@H]1C[C@@](C(=O)O[C@@H]2CCN(C/C=C(\C2=O)/COC(=O)[C@]1(C)O)C)([C@@H](C)O)O	64.3	Phenylpropanoids and polyketides	Macrolides and analogues		0	15302.8	0	14088
10.52_310.2144n	4-[1-(1-cyclohexylpyrrolidin-3-yl)-5-methylimidazol-2-yl]pyridine	C19H26N4	10.5156	293.211	pos	M+H-H2O, M+H, M+Na				64.3				200635	48608	52416.5	16355
9.23_541.1708m/z	Aloeresin A	C28H28O11	9.23412	541.171	pos	M+H	5317657	QACRJXSXSVUOFZ-HINKZNOMSA-N	CC1=CC(=C(C2=C1C(=O)C=C(O2)CC(=O)C)[C@H]3[C@@H]([C@H]([C@@H]([C@H](O3)CO)O)O)OC(=O)/C=C/C4=CC=C(C=C4)O)O	64.3	Organic oxygen compounds	Organooxygen compounds	Carbohydrates and carbohydrate conjugates	21220.3	0	0	0
0.79_177.0137m/z	Monoethyl malonic acid	C5H8O4	0.792383	177.014	pos	M+2Na-H				64.2				0	34049.8	0	27298.1
12.29_303.2320m/z	Methyltestosterone	C20H30O2	12.2885	303.232	pos	M+H	6010	GCKMFJBGXUYNAG-HLXURNFRSA-N	C[C@]12CCC(=O)C=C1CC[C@@H]3[C@@H]2CC[C@]4([C@H]3CC[C@]4(C)O)C	64.1	Lipids and lipid-like molecules	Steroids and steroid derivatives	Androstane steroids	1517.91	0	18244.1	221.847
12.89_784.5852m/z	PC(18:2(9Z,12Z)/18:1(9Z))	C44H82NO8P	12.8896	784.585	pos	M+H				64				627189	688206	836059	1.47665e+06
14.39_209.1538m/z	Megastigm-7-ene-3,4,6,9-tetrol	C13H24O4	14.3857	209.154	pos	M+H-2H2O	75151906	GOTQJVUEKCNRKB-UHFFFAOYSA-N	CC1C(C(CC(C1(C=CC(C)O)O)(C)C)O)O	64	Lipids and lipid-like molecules	Prenol lipids	Sesquiterpenoids	17129.4	15462	3396.28	19977.8
7.42_387.1439m/z	Yukovanol	C20H18O6	7.4213	387.144	pos	M+CH3OH+H	14542257	CXIZZLWYTVCYIE-UHFFFAOYSA-N	CC1(C=CC2=C(O1)C=C(C3=C2OC(C(C3=O)O)C4=CC=C(C=C4)O)O)C	63.9	Phenylpropanoids and polyketides	Flavonoids	Pyranoflavonoids	12684.6	813.13	9135.54	10576.1
5.58_378.2389m/z	Val Leu Phe	C20H31N3O4	5.58033	378.239	pos	M+H	101750924	ZZGPVSZDZQRJQY-ULQDDVLXSA-N	CC(C)C[C@@H](C(=O)N[C@@H](CC1=CC=CC=C1)C(=O)O)NC(=O)[C@H](C(C)C)N	63.8	Organic acids and derivatives	Carboxylic acids and derivatives	Amino acids, peptides, and analogues	0	50014.4	0	29985.6
12.72_338.1607m/z	[(2R)-1-[(2S)-6-oxo-2,3-dihydropyran-2-yl]propan-2-yl] 3-(3,4-dihydroxyphenyl)propanoate	C17H20O6	12.7158	338.161	pos	M+NH4	11782184	DEJPAJWPCTUPPL-YPMHNXCESA-N	C[C@H](C[C@@H]1CC=CC(=O)O1)OC(=O)CCC2=CC(=C(C=C2)O)O	63.8	Benzenoids	Phenols	Benzenediols	0	14271.3	2835.57	0
8.46_509.1445m/z	1,5-Diferuloylquinic acid	C27H28O12	8.459	509.145	pos	M+H-2H2O				63.8				21441.9	0	0	0
5.01_370.2203n	Octaethylene glycol	C16H34O9	5.01138	388.254	pos	M+NH4, M+Na, M+H	78798	GLZWNFNQMJAZGY-UHFFFAOYSA-N	C(COCCOCCOCCOCCOCCOCCOCCO)O	63.7	Organic oxygen compounds	Organooxygen compounds	Ethers	179271	208684	176756	199696
5.18_243.1340m/z	Glutamylleucine	C11H20N2O5	5.18195	243.134	pos	M+H-H2O	9856500	YBAFDPFAUTYYRW-YUMQZZPRSA-N	CC(C)C[C@@H](C(=O)O)NC(=O)[C@H](CCC(=O)O)N	63.6	Organic acids and derivatives	Carboxylic acids and derivatives	Amino acids, peptides, and analogues	395.183	42716.5	0	34645.7
7.87_353.1016m/z	10-Hydroxy-2,8-decadiene-4,6-diynoic acid	C10H8O3	7.86868	353.102	pos	2M+H	131751124	AJSNUBLNFVLJEB-CGXWXWIYSA-N	C(/C=C\C#CC#C/C=C/C(=O)O)O	63.6	Lipids and lipid-like molecules	Fatty Acyls	Fatty acids and conjugates	15046.1	0	0	598.045
5.40_353.0868m/z	Monnieriside A	C16H18O10	5.3968	353.087	pos	M+H-H2O	70686986	HKSWNVKSXBFJGZ-YMILTQATSA-N	C1=C(C=C2C(=C1O)C(=O)C=C(O2)CO[C@H]3[C@@H]([C@H]([C@@H]([C@H](O3)CO)O)O)O)O	63.6	Organic oxygen compounds	Organooxygen compounds	Carbohydrates and carbohydrate conjugates	25023.5	3414.08	0	0
13.93_194.1673n	beta-Ionol	C13H22O	13.9291	212.201	pos	M+H-H2O, M+NH4	5373729	CNOPDZWOYFOHGN-BQYQJAHWSA-N	CC1=C(C(CCC1)(C)C)/C=C/C(C)O	63.6	Lipids and lipid-like molecules	Prenol lipids	Sesquiterpenoids	13813.2	15561.1	7417.67	15646.1
7.08_386.1001n	Moluccanin	C20H18O8	7.08058	387.107	pos	M+H-H2O, M+H, M+H-2H2O	14134112	GBLZBLJGCQTQMB-UHFFFAOYSA-N	COC1=CC(=CC(=C1O)OC)C2C(OC3=C(O2)C=C4C(=C3)C=CC(=O)O4)CO	63.6	Lignans, neolignans and related compounds	Coumarinolignans		12877.6	1227.9	22280.1	392285
5.64_615.1710m/z	Liquiritigenin 4'-[3-acetylapiosyl-(1->2)-glucoside]	C28H32O14	5.63552	615.171	pos	M+Na				63.5				137773	0	0	3962.45
3.83_282.1198m/z	1-Methyladenosine	C11H15N5O4	3.83328	282.12	pos	M+H	27476	GFYLSDSUCHVORB-IOSLPCCCSA-N	CN1C=NC2=C(C1=N)N=CN2[C@H]3[C@@H]([C@@H]([C@H](O3)CO)O)O	63.3	Nucleosides, nucleotides, and analogues	Purine nucleosides		115.34	0	23315.1	0
12.12_262.2298n	Farnesyl acetone	C18H30O	12.1178	280.264	pos	M+H, M+NH4	1711945	LTUMRKDLVGQMJU-IUBLYSDUSA-N	CC(=CCC/C(=C/CC/C(=C/CCC(=O)C)/C)/C)C	63.2	Lipids and lipid-like molecules	Prenol lipids	Diterpenoids	2923.73	64144.3	14163.3	38255.5
4.75_352.1866m/z	Val Ser Phe	C17H25N3O5	4.75278	352.187	pos	M+H	7020215	LSLXWOCIIFUZCQ-SRVKXCTJSA-N	CC(C)[C@@H](C(=O)N[C@@H](C(C)C)C(=O)N[C@@H](C(C)C)C(=O)O)N	63.2	Organic acids and derivatives	Carboxylic acids and derivatives	Amino acids, peptides, and analogues	0	35481.7	0	12777.7
10.45_358.3679m/z	Docosanoic acid	C22H44O2	10.452	358.368	pos	M+NH4	8215	UKMSUNONTOPOIO-UHFFFAOYSA-N	CCCCCCCCCCCCCCCCCCCCCC(=O)O	63	Lipids and lipid-like molecules	Fatty Acyls	Fatty acids and conjugates	337246	556855	135536	688612
5.94_262.2377m/z	Ethyl 3-hydroxydodecanoate	C14H28O3	5.93627	262.238	pos	M+NH4	575843	CQLRIUYMQWJYSR-UHFFFAOYSA-N	CCCCCCCCCC(CC(=O)OCC)O	62.9	Lipids and lipid-like molecules	Fatty Acyls	Fatty alcohols	0	0	45215.6	0
7.19_392.1337m/z	Comosin	C19H18O8	7.18633	392.134	pos	M+NH4	21676269	IOLHWMMZYCBLRD-UHFFFAOYSA-N	CC(=O)OCC1(COC2=CC(=CC(=C2C1=O)O)O)C3=CC(=C(C=C3)OC)O	62.9	Phenylpropanoids and polyketides	Isoflavonoids	O-methylated isoflavonoids	25797.7	0	0	0
10.67_310.2144n	13S-Hydroperoxy-9Z,11E,15Z-octadecatrienoic acid	C18H30O4	10.675	293.211	pos	M+H-H2O, M+H	5497123	UYQGVDXDXBAABN-FQSPHKRJSA-N	CC/C=C\C[C@@H](/C=C/C=C\CCCCCCCC(=O)O)OO	62.8	Lipids and lipid-like molecules	Fatty Acyls	Lineolic acids and derivatives	22957.6	7691.38	8507.53	5234.33
0.76_281.0706m/z	Luteone 7-glucoside	C26H28O11	0.764933	281.071	pos	M+2Na	131752607	DOIIPZVFYVWPPS-UHFFFAOYSA-N	CC(=CCC1=C(C=C2C(=C1O)C(=O)C(=CO2)C3=C(C=C(C=C3)O)O)OC4C(C(C(C(O4)CO)O)O)O)C	62.6	Phenylpropanoids and polyketides	Isoflavonoids	Isoflavonoid O-glycosides	16235.4	166896	0	393673
13.54_447.3835m/z	4alpha-Formyl-5alpha-cholesta-8-en-3beta-ol	C28H46O2	13.5386	447.383	pos	M+CH3OH+H	44263320	MHYWFGFPMGLYBL-NUESBDPTSA-N	C[C@H](CCCC(C)C)[C@H]1CC[C@@H]2[C@@]1(CCC3=C2CC[C@@H]4[C@@]3(CC[C@@H]([C@H]4C=O)O)C)C	62.5	Lipids and lipid-like molecules	Steroids and steroid derivatives	Cholestane steroids	72800.6	31645.1	219.79	0
0.84_288.2031m/z	Leu Arg	C12H25N5O3	0.842117	288.203	pos	M+H	3800205	SENJXOPIZNYLHU-UHFFFAOYSA-N	CC(C)CC(C(=O)NC(CCCN=C(N)N)C(=O)O)N	62.4	Organic acids and derivatives	Carboxylic acids and derivatives	Amino acids, peptides, and analogues	0	117401	0	36949.2
7.72_355.1175m/z	Glycosmisic acid	C20H20O7	7.7152	355.118	pos	M+H-H2O	38356815	FHYQIQMSODIFCP-WARYXCEBSA-N	COC1=CC(=CC2=C1O[C@H]([C@@H]2CO)C3=CC(=C(C=C3)O)OC)/C=C/C(=O)O	62.2	Phenylpropanoids and polyketides	2-arylbenzofuran flavonoids		50073.5	2205.32	362.153	3311.96
10.45_219.1381m/z	Palitantin	C14H22O4	10.452	219.138	pos	M+H-2H2O	6438427	MPOXQBRZHHNMER-XZQMCIKJSA-N	CCC/C=C/C=C/[C@@H]1C[C@H]([C@H](C(=O)[C@H]1CO)O)O	62.2	Organic oxygen compounds	Organooxygen compounds	Alcohols and polyols	6142.22	6998.22	6001.46	7415.18
11.09_199.1483m/z	3-Phenylpropyl hexanoate	C15H22O2	11.0887	199.148	pos	M+H-2H2O				62				10513.2	900.664	149.023	918.037
4.33_316.2228m/z	Ala Ile Leu	C15H29N3O4	4.32508	316.223	pos	M+H	145453606	TZDNWXDLYFIFPT-BJDJZHNGSA-N	CC[C@H](C)[C@@H](C(=O)N[C@@H](CC(C)C)C(=O)O)NC(=O)[C@H](C)N	62	Organic acids and derivatives	Carboxylic acids and derivatives	Amino acids, peptides, and analogues	0	62713.3	0	42330.3
6.27_335.1125m/z	Loureiriol	C16H14O6	6.2662	335.112	pos	M+CH3OH+H	11722425	CKOAWBPJSODKQL-MRXNPFEDSA-N	C1[C@@](C(=O)C2=C(C=C(C=C2O1)O)O)(CC3=CC=C(C=C3)O)O	62	Phenylpropanoids and polyketides	Homoisoflavonoids	Homoisoflavans	50005.9	0	78.5328	0
13.93_208.1829n	2-Cyclotetradecen-1-one	C14H24O	13.9291	226.217	pos	M+H-H2O, M+NH4	6365540	RYRDADIPPFMIQM-ZRDIBKRKSA-N	C1CCCCC/C=C/C(=O)CCCCC1	62	Organic oxygen compounds	Organooxygen compounds	Carbonyl compounds	15197.5	18332	8139.42	17139.5
6.67_209.0809m/z	Sinapaldehyde	C11H12O4	6.66758	209.081	pos	M+H	5280802	CDICDSOGTRCHMG-ONEGZZNKSA-N	COC1=CC(=CC(=C1O)OC)/C=C/C=O	61.7	Benzenoids	Phenols	Methoxyphenols	89523.1	22669.7	58483.3	89603.5
5.15_350.2073m/z	Ala Leu Phe	C18H27N3O4	5.14932	350.207	pos	M+H	57009398	VHVVPYOJIIQCKS-QEJZJMRPSA-N	C[C@@H](C(=O)N[C@@H](CC(C)C)C(=O)N[C@@H](CC1=CC=CC=C1)C(=O)O)N	61.7	Organic acids and derivatives	Carboxylic acids and derivatives	Amino acids, peptides, and analogues	117.523	21214.8	0	8897.25
5.15_302.2074m/z	Gly Leu Leu	C14H27N3O4	5.14932	302.207	pos	M+H	7019089	YOKVEHGYYQEQOP-QWRGUYRKSA-N	CC(C)C[C@@H](C(=O)N[C@@H](CC(C)C)C(=O)NCC(=O)O)N	61.7	Organic acids and derivatives	Carboxylic acids and derivatives	Amino acids, peptides, and analogues	0	33659.7	0	19782
6.96_355.1175m/z	4-(3,4-Dihydroxyphenyl)-2,3-dihydro-2,3-dihydroxy-1H-phenalen-1-one	C19H14O5	6.96348	355.117	pos	M+CH3OH+H	85362234	KYFLPCGJIAGYKZ-UHFFFAOYSA-N	C1=CC2=C3C(=C1)C(=O)C(C(C3=C(C=C2)C4=CC(=C(C=C4)O)O)O)O	61.4	Benzenoids	Naphthalenes	Phenylnaphthalenes	63805.8	1022.76	36666.3	46764.4
7.37_371.1124m/z	(R)-Apiumetin glucoside	C20H22O9	7.37375	371.112	pos	M+H-2H2O				61.4				11985.2	230.805	2043.72	6247.19
5.66_683.1458m/z	Tricin 7-diglucuronoside	C29H30O19	5.6588	683.146	pos	M+H				61.2				89385.2	5553.88	0	150997
4.85_350.2073m/z	Leu Phe Ala	C18H27N3O4	4.8527	350.207	pos	M+H	5478845	BYXHQQCXAJARLQ-ZLUOBGJFSA-N	C[C@@H](C(=O)N[C@@H](C)C(=O)N[C@@H](C)C(=O)O)N	61.2	Organic acids and derivatives	Carboxylic acids and derivatives	Amino acids, peptides, and analogues	0	23574.4	0	21083.3
14.18_609.2716m/z	Chlorahololide C	C33H36O9	14.185	609.272	pos	M+CH3OH+H	127045345	FUWHPWXSVUDXDS-XMJAEXKHSA-N	CC1=C2[C@@H]([C@H]3C(=C)[C@H]4C[C@H]4[C@@]3([C@H]5[C@@]2(C\6=C7[C@]([C@@H]8C[C@@H]8[C@]7(C5)O)([C@H](C(=O)/C6=C(/C)\C(=O)OC)O)C)OC1=O)C)OC(=O)C	60.8	Lipids and lipid-like molecules	Prenol lipids	Triterpenoids	44748.1	477.414	538.202	0
7.62_193.0860m/z	4-Methylcoumarin	C10H8O2	7.6206	193.086	pos	M+CH3OH+H	11833	PSGQCCSGKGJLRL-UHFFFAOYSA-N	CC1=CC(=O)OC2=CC=CC=C12	60.8	Phenylpropanoids and polyketides	Coumarins and derivatives		10247.2	641.387	3089.42	2675.76
6.93_178.0631n	3,4-Dihydro-3,4-dihydroxynaphthalen-1(2H)-one	C10H10O3	6.92912	211.097	pos	M+NH4, M+CH3OH+H	53439501	NOCQQUBFJURTDN-UHFFFAOYSA-N	C1C(C(C2=CC=CC=C2C1=O)O)O	60.8	Benzenoids	Tetralins		16626.5	0	895.811	0
5.59_195.0655m/z	beta-(2-Methoxyphenoxy)-lactic acid	C10H12O5	5.59178	195.066	pos	M+H-H2O				60.7				179034	30001.3	1.40067e+06	26471.9
5.74_189.0912m/z	Isoeugenol acetate	C12H14O3	5.73688	189.091	pos	M+H-H2O	876160	IUSBVFZKQJGVEP-SNAWJCMRSA-N	C/C=C/C1=CC(=C(C=C1)OC(=O)C)OC	60.6	Benzenoids	Phenol esters		0	0	13699.7	0
4.16_207.1130m/z	L-PHENYLALANINE	C9H11NO2	4.15752	207.113	pos	M+ACN+H	6140	COLNVLDHVKWLRT-QMMMGPOBSA-N	C1=CC=C(C=C1)C[C@@H](C(=O)O)N	60.4	Organic acids and derivatives	Carboxylic acids and derivatives	Amino acids, peptides, and analogues	0	0	62261.3	0
0.71_273.1192m/z	Argininosuccinic acid	C10H18N4O6	0.711383	273.119	pos	M+H-H2O	16950	KDZOASGQNOPSCU-WDSKDSINSA-N	C(C[C@@H](C(=O)O)N)CN=C(N)N[C@@H](CC(=O)O)C(=O)O	60.3	Organic acids and derivatives	Carboxylic acids and derivatives	Amino acids, peptides, and analogues	132316	0	0	0
4.86_342.1700m/z	3-(5-hydroxy-2,2-dimethyl-2H-chromen-6-yl)-1-(4-hydroxyphenyl)propan-1-one	C20H20O4	4.8643	342.17	pos	M+NH4				60.3				50810.5	25183.8	409932	16259.8
4.58_217.0496m/z	Anhydrobrazilic Acid	C12H10O5	4.58467	217.05	pos	M+H-H2O	4303260	KVQVEJPIQHNLTM-UHFFFAOYSA-N	COC1=CC2=C(C=C1)C(=O)C(=CO2)CC(=O)O	60.2	Organoheterocyclic compounds	Benzopyrans	1-benzopyrans	6135.55	813.966	0	0
1.24_203.1392m/z	Alanylisoleucine	C9H18N2O3	1.24382	203.139	pos	M+H				60.2				2886.6	39552.7	0	19914.2
10.26_291.1955m/z	(all-E)-1,8,10-Heptadecatriene-4,6-diyne-3,12-diol	C17H22O2	10.2596	291.195	pos	M+CH3OH+H	131752714	ADJNQGJVAJRCCO-KDFHGORWSA-N	CCCCCC(/C=C/C=C/C#CC#CC(C=C)O)O	60.1	Lipids and lipid-like molecules	Fatty Acyls	Fatty alcohols	19102.3	4140.21	60614.7	2943.03
0.84_338.1082m/z	Ribonolactone	C5H8O5	0.842117	338.108	pos	2M+ACN+H	111064	CUOKHACJLGPRHD-BXXZVTAOSA-N	C([C@@H]1[C@H]([C@H](C(=O)O1)O)O)O	59.9	Organic oxygen compounds	Organooxygen compounds	Carbohydrates and carbohydrate conjugates	52815.4	171.598	0	0
6.39_209.0809m/z	7-Methoxycoumarin	C10H8O3	6.39475	209.081	pos	M+CH3OH+H	10748	LIIALPBMIOVAHH-UHFFFAOYSA-N	COC1=CC2=C(C=C1)C=CC(=O)O2	59.8	Phenylpropanoids and polyketides	Coumarins and derivatives		78279.2	13892.3	64269.6	30256.1
10.35_315.1955m/z	4-oxo-Retinoic acid	C20H26O3	10.3501	315.196	pos	M+H	6437063	GGCUJPCCTQNTJF-FRCNGJHJSA-N	CC1=C(C(CCC1=O)(C)C)/C=C/C(=C/C=C/C(=C/C(=O)O)/C)/C	59.8	Lipids and lipid-like molecules	Prenol lipids	Retinoids	1759.47	0	100390	0
11.84_360.2168m/z	Ganomycin I	C21H26O4	11.8394	360.217	pos	M+NH4	46186831	PXLVYLVZICPHKW-OVCLIPMQSA-N	CC(=CCC/C(=C/CCC1=CC(OC1=O)C2=C(C=CC(=C2)O)O)/C)C	59.8	Lipids and lipid-like molecules	Prenol lipids	Terpene lactones	1392.12	84.7124	55472.9	9492.25
4.36_326.2074m/z	Pro Pro Leu	C16H27N3O4	4.36135	326.207	pos	M+H	11858292	CGSOWZUPLOKYOR-AVGNSLFASA-N	CC(C)C[C@@H](C(=O)O)NC(=O)[C@@H]1CCCN1C(=O)[C@@H]2CCCN2	59.8	Organic acids and derivatives	Carboxylic acids and derivatives	Amino acids, peptides, and analogues	0	78707.4	12380.7	146050
1.07_279.1318n	N-(1-Deoxy-1-fructosyl)valine	C11H21NO7	1.07188	280.139	pos	M+H-H2O, M+H	131752247	OANCGDPJMNPBDV-BUFOXMIFSA-N	CC(C)[C@@H](C(=O)O)NCC1([C@H]([C@@H]([C@H](O1)CO)O)O)O	59.6	Organic acids and derivatives	Carboxylic acids and derivatives	Amino acids, peptides, and analogues	297267	34868.5	0	22938.2
4.17_316.1868m/z	Pro Ser Ile	C14H25N3O5	4.1681	316.187	pos	M+H	145456183	PFPUFNLHBXKPHY-HTFCKZLJSA-N	CC[C@H](C)[C@@H](C(=O)N[C@@H]([C@@H](C)CC)C(=O)N[C@@H](CO)C(=O)O)N	59.6	Organic acids and derivatives	Carboxylic acids and derivatives	Amino acids, peptides, and analogues	0	71411.4	0	37343.5
13.67_255.2561n	Obscuraminol E	C16H33NO	13.6728	256.263	pos	M+H, M+ACN+H	134715064	QNWQYXJJIAXWKD-BUWFCSEKSA-N	CCCC/C=C/CCCCCCC[C@H]([C@H](C)N)O	59.5	Organic nitrogen compounds	Organonitrogen compounds	Amines	3.51971e+06	6.1052e+06	1.83086e+06	3.78499e+06
13.09_166.1360n	Dihydrojasmone	C11H18O	13.0878	184.17	pos	M+H-H2O, M+NH4	62378	YCIXWYOBMVNGTB-UHFFFAOYSA-N	CCCCCC1=C(CCC1=O)C	59.5	Organic oxygen compounds	Organooxygen compounds	Carbonyl compounds	15512.4	16896.1	7690.43	16352.3
7.85_343.1177m/z	Diosbulbin J	C19H22O8	7.84562	343.118	pos	M+H-2H2O	44130234	VFBSFVHKKKXNHM-JFQAYLLPSA-N	C[C@@]12C[C@H](OC(=O)[C@H]1CC(=O)[C@]3([C@H]2C[C@H](C[C@H]3C(=O)O)O)O)C4=COC=C4	59.4	Lipids and lipid-like molecules	Prenol lipids	Terpene lactones	1483.48	0	0	5970.12
4.70_360.2128m/z	Ile Ile Asp	C16H29N3O6	4.69687	360.213	pos	M+H	73669361	PWDSHAAAFXISLE-SXTJYALSSA-N	CC[C@H](C)[C@@H](C(=O)N[C@@H]([C@@H](C)CC)C(=O)N[C@@H](CC(=O)O)C(=O)O)N	59.4	Organic acids and derivatives	Carboxylic acids and derivatives	Amino acids, peptides, and analogues	0	154831	0	66661
8.26_301.1071m/z	4',7-Di-O-methylnaringenin	C17H16O5	8.26132	301.107	pos	M+H	14057196	CKEXCBVNKRHAMX-HNNXBMFYSA-N	COC1=CC=C(C=C1)[C@@H]2CC(=O)C3=C(C=C(C=C3O2)OC)O	59.3	Phenylpropanoids and polyketides	Flavonoids	O-methylated flavonoids	26009.9	0	0	0
9.18_335.1854m/z	5-Megastigmen-7-yne-3,9-diol 9-glucoside	C19H30O7	9.18248	335.185	pos	M+H-2H2O	85258909	NVFMDEVKKYQMLD-UHFFFAOYSA-N	CC1=C(C(CC(C1)O)(C)C)C#CC(C)OC2C(C(C(C(O2)CO)O)O)O	59.1	Lipids and lipid-like molecules	Fatty Acyls	Fatty acyl glycosides	8768.49	0	206.263	0
8.20_211.1329m/z	Jasmonic acid	C12H18O3	8.2016	211.133	pos	M+H	5281166	ZNJFBWYDHIGLCU-HWKXXFMVSA-N	CC/C=C\C[C@@H]1[C@H](CCC1=O)CC(=O)O	59	Lipids and lipid-like molecules	Fatty Acyls	Lineolic acids and derivatives	4969.09	1232.72	1442.68	489.131
11.07_400.3423m/z	Persenone B	C23H42O4	11.0747	400.342	pos	M+NH4	9975455	DSLYZXQQSWFUHY-FOCLMDBBSA-N	CCCCCCCCCCCCC/C=C/C(=O)CC(COC(=O)C)O	58.8	Lipids and lipid-like molecules	Fatty Acyls	Fatty alcohols	25232.4	30354.1	20143.7	27407.2
5.03_302.2075m/z	Ala Val Leu	C14H27N3O4	5.03473	302.207	pos	M+H	5478845	BYXHQQCXAJARLQ-ZLUOBGJFSA-N	C[C@@H](C(=O)N[C@@H](C)C(=O)N[C@@H](C)C(=O)O)N	58.7	Organic acids and derivatives	Carboxylic acids and derivatives	Amino acids, peptides, and analogues	0	61114.7	0	51443.7
12.67_245.1901m/z	10-O-Acetylisocalamendiol	C17H28O3	12.6743	245.19	pos	M+H-2H2O	124519251	VFQTZHSGAKUHKS-MWDXBVQZSA-N	CC(C)[C@@H]1CC[C@@]([C@H]2[C@]1(CC(=C)CC2)O)(C)OC(=O)C	58.7	Lipids and lipid-like molecules	Prenol lipids	Sesquiterpenoids	8841.93	6773.99	8221.01	8629.16
14.47_593.2762m/z	Capsicum annuum Fluorescent chlorophyll catabolite	C35H40N4O7	14.4661	593.276	pos	M+H-2H2O				58.7				401811	23849.6	23334.7	14346.9
12.66_308.2044m/z	Farnesylcysteine	C18H31NO2S	12.6609	308.204	pos	M+H-H2O	6438372	SYSLNQMKLROGCL-BCYUYYMPSA-N	CC(=CCC/C(=C/CC/C(=C/CSC[C@@H](C(=O)O)N)/C)/C)C	58.6	Lipids and lipid-like molecules	Prenol lipids	Sesquiterpenoids	0	21638.4	4866.28	0
4.96_326.1000n	Bilobalide	C15H18O8	4.96342	327.107	pos	M+H, M+Na				58.3				64513.4	0	0	775.52
5.91_771.2137m/z	Isovitexin 2''-O-(6'''-feruloyl)glucoside	C37H38O18	5.91225	771.214	pos	M+H				58.2				168285	878.769	0	3933.83
0.72_239.0139m/z	3,4,5,6-tetrahydroxyoxane-2-carboxylic acid	C6H10O7	0.724	239.014	pos	M+2Na-H				58.1				0	34419.1	0	84625.6
10.41_135.1170m/z	Carveol	C10H16O	10.4132	135.117	pos	M+H-H2O	7438	BAVONGHXFVOKBV-UHFFFAOYSA-N	CC1=CCC(CC1O)C(=C)C	58.1	Lipids and lipid-like molecules	Prenol lipids	Monoterpenoids	1556.16	1530.24	2120.94	2070.25
7.75_367.1176m/z	Isosalvipuberulin	C20H14O5	7.75038	367.118	pos	M+CH3OH+H	189288	HIBSGIRHUQGFAD-SFHVURJKSA-N	CC1=C2C=CCC3=C(C2=CC4=C1[C@@H](OC4=O)C5=COC=C5)COC3=O	58.1	Organoheterocyclic compounds	Benzofurans	Benzofuranones	9240.91	0	0	0
1.78_232.1423n	Thr Leu	C10H20N2O4	1.78258	233.15	pos	M+H, M+ACN+H	7021828	BQBCIBCLXBKYHW-CSMHCCOUSA-N	C[C@H]([C@@H](C(=O)N[C@@H](CC(C)C)C(=O)O)N)O	57.7	Organic acids and derivatives	Carboxylic acids and derivatives	Amino acids, peptides, and analogues	218.489	130871	0	90760.1
5.45_633.1815m/z	Zizybeoside II	C25H38O16	5.45448	633.182	pos	M+K				57.7				195199	0	0	8476.32
4.57_302.2075m/z	Leu Gly Leu	C14H27N3O4	4.57188	302.207	pos	M+H	7019089	YOKVEHGYYQEQOP-QWRGUYRKSA-N	CC(C)C[C@@H](C(=O)N[C@@H](CC(C)C)C(=O)NCC(=O)O)N	57.5	Organic acids and derivatives	Carboxylic acids and derivatives	Amino acids, peptides, and analogues	0	273288	0	205946
5.34_217.0972m/z	1,2,3,4-tetrahydro-6-methoxy-1-oxo-beta-carboline	C12H12N2O2	5.3424	217.097	pos	M+H				57.3				126.906	948.42	7216.45	169.438
3.94_384.1500m/z	PALATINOSE	C12H22O11	3.94128	384.15	pos	M+ACN+H	439559	PVXPPJIGRGXGCY-TZLCEDOOSA-N	C([C@@H]1[C@H]([C@@H]([C@H]([C@H](O1)OC[C@@H]2[C@H]([C@@H](C(O2)(CO)O)O)O)O)O)O)O	57.3	Organic oxygen compounds	Organooxygen compounds	Carbohydrates and carbohydrate conjugates	99884.9	0	0	0
7.29_325.1070m/z	Vitexdoin A	C19H18O6	7.29122	325.107	pos	M+H-H2O	44478946	PNRPRUVCFFHMMC-LIRRHRJNSA-N	COC1=C(C=CC(=C1)[C@@H]2[C@H](C(=CC3=CC(=C(C=C23)O)O)C=O)CO)O	56.9	Lignans, neolignans and related compounds	Aryltetralin lignans		38820.4	0	0	1861.17
0.76_103.0639n	gamma-Aminobutyric acid	C4H9NO2	0.764933	104.071	pos	M+H-H2O, M+H	119	BTCSSZJGUNDROE-UHFFFAOYSA-N	C(CC(=O)O)CN	56.7	Organic acids and derivatives	Carboxylic acids and derivatives	Amino acids, peptides, and analogues	1.01644e+06	6219.43	5026.59	4245.25
5.50_245.1860m/z	Bisabolol	C15H26O	5.4995	245.186	pos	M+Na	1549992	RGZSQWQPBWRIAQ-LSDHHAIUSA-N	CC1=CC[C@@H](CC1)[C@@](C)(CCC=C(C)C)O	56.5	Lipids and lipid-like molecules	Prenol lipids	Sesquiterpenoids	0	509.967	7129.75	0
12.18_292.2767n	Geranylcitronellol	C20H36O	12.1833	310.311	pos	M+H, M+NH4	5365870	ZKWFMIAGZQACFE-NWLVNBMCSA-N	CC(CC/C=C(\C)/CC/C=C(\C)/CCC=C(C)C)CCO	56.5	Lipids and lipid-like molecules	Prenol lipids	Diterpenoids	9368.92	2.00314e+06	1.54011e+06	1.99499e+06
5.32_339.0712m/z	6-{[3-(3,4-dihydroxyphenyl)-2-hydroxypropanoyl]oxy}-3,4,5-trihydroxyoxane-2-carboxylic acid	C15H18O11	5.3195	339.071	pos	M+H-2H2O				56.4				80328.7	0	0	0
14.41_439.3209m/z	(3beta,17alpha,23S,24S)-17,23-Epoxy-3,24,29-trihydroxy-27-norlanost-8-en-15-one	C29H46O5	14.4126	439.321	pos	M+H-2H2O	131751674	FGFZDTLKZFGANR-UHFFFAOYSA-N	CCC(C1CC(C2(O1)CC(=O)C3(C2(CCC4=C3CCC5C4(CCC(C5(C)CO)O)C)C)C)C)O	56.4	Lipids and lipid-like molecules	Prenol lipids	Triterpenoids	2098.45	1441.48	501.501	5894.74
2.14_192.1383m/z	N-Ethyl-N-Methylcathinone	C12H17NO	2.13825	192.138	pos	M+H	43794825	LOQPFJRCXJZNQV-UHFFFAOYSA-N	CCN(C)C(C)C(=O)C1=CC=CC=C1	56.4	Organic oxygen compounds	Organooxygen compounds	Carbonyl compounds	0	0	1.86234e+06	0
13.06_133.1014m/z	Cumic alcohol	C10H14O	13.0611	133.101	pos	M+H-H2O	325	OIGWAXDAPKFNCQ-UHFFFAOYSA-N	CC(C)C1=CC=C(C=C1)CO	56.4	Lipids and lipid-like molecules	Prenol lipids	Monoterpenoids	12795.9	16168.3	12407.1	22288.9
13.05_530.3479m/z	Glyuranolide	C31H44O6	13.0484	530.348	pos	M+NH4	195396	MKDSBDQLSLPNOQ-YDJDNKAXSA-N	C[C@]12CC[C@@H](C([C@@H]1CC[C@@]3([C@@H]2C(=O)C=C4[C@]3(CC[C@@]5([C@H]4C[C@@]6(C[C@H]5OC6=O)C)C)C(=O)OC)C)(C)C)O	56.4	Lipids and lipid-like molecules	Prenol lipids	Triterpenoids	49007.2	48433	51943	85120.7
7.17_335.1125m/z	2,3',6-Trihydroxy-4'-methoxybenzylcoumaranone	C16H14O6	7.17392	335.112	pos	M+CH3OH+H				56.3				73099.7	84.5828	1535.82	0
11.14_234.1853m/z	Isocuparenal	C15H20O	11.1413	234.185	pos	M+NH4	14830705	KJYANGWERYBSJY-HNNXBMFYSA-N	C[C@]1(CCCC1(C)C)C2=CC=C(C=C2)C=O	56.3	Lipids and lipid-like molecules	Prenol lipids	Sesquiterpenoids	24534.3	26710.5	23553.4	27770.3
11.32_284.2948m/z	2-Tetradecylcyclobutanone	C18H34O	11.3151	284.295	pos	M+NH4	566940	HTZLOIBLMXPDGR-UHFFFAOYSA-N	CCCCCCCCCCCCCCC1CCC1=O	56.2	Organic oxygen compounds	Organooxygen compounds	Carbonyl compounds	42149.4	3.56409e+06	8.07266e+06	1.41959e+06
9.94_348.2169m/z	Pterisolic acid C	C20H26O4	9.94082	348.217	pos	M+NH4				56.1				0	0	0	985.652
0.81_234.0717n	(2Z,4'Z)-2-(5-Methylthio-4-penten-2-ynylidene)-1,6-dioxaspiro[4.4]non-3-ene	C13H14O2S	0.811867	235.079	pos	M+H, 2M+ACN+Na				56				7951.55	946848	0	930322
1.36_284.0982m/z	Guanosine	C10H13N5O5	1.35808	284.098	pos	M+H	135398635	NYHBQMYGNKIUIF-UUOKFMHZSA-N	C1=NC2=C(N1[C@H]3[C@@H]([C@@H]([C@H](O3)CO)O)O)N=C(NC2=O)N	56	Nucleosides, nucleotides, and analogues	Purine nucleosides		200385	55018	0	71379.5
1.07_227.0907n	Deoxycytidine	C9H13N3O4	1.07188	228.098	pos	M+H, 2M+H	13711	CKTSBUTUHBMZGZ-SHYZEUOFSA-N	C1[C@@H]([C@H](O[C@H]1N2C=CC(=NC2=O)N)CO)O	55.7	Nucleosides, nucleotides, and analogues	Pyrimidine nucleosides	Pyrimidine 2'-deoxyribonucleosides	6376.62	4119.59	0	269207
5.01_416.2280m/z	Syneilesine	C19H29NO7	5.01138	416.228	pos	M+CH3OH+H	6440164	GUCAZZVOPNEPFJ-VZXZMQOTSA-N	CCC1[C@H]([C@H]([C@@](C(=O)OC/C/2=C/CN(CC[C@H](C2=O)OC1=O)C)(C)O)C)O	55.6	Phenylpropanoids and polyketides	Macrolides and analogues		0	85054.1	0	143449
10.90_276.2322m/z	Crucigasterin 275	C18H29NO	10.9009	276.232	pos	M+H	23427563	DBUTWWBBBQFAJO-HPNSCBLISA-N	C[C@H]([C@H](C/C=C/CC/C=C\C/C=C\C/C=C\C=C)O)N	55.5	Organic nitrogen compounds	Organonitrogen compounds	Amines	0	7592.17	986.919	0
7.66_541.1344m/z	8-C-(2-Rhamnosyl-6-deoxyhexopyranosulyl)luteolin	C27H28O14	7.6571	541.134	pos	M+H-2H2O	102040777	NILIUZQXMFPKPV-DVMLBOTRSA-N	C[C@H]1[C@@H]([C@H]([C@H]([C@@H](O1)O[C@H]2[C@@H](O[C@@H]([C@H](C2=O)O)C)C3=C(C=C(C4=C3OC(=CC4=O)C5=CC(=C(C=C5)O)O)O)O)O)O)O	55.5	Phenylpropanoids and polyketides	Flavonoids	Flavones	4611.05	0	329442	861097
8.20_227.0550m/z	4,5,7-trihydroxy-2H-chromen-2-one	C9H6O5	8.2016	227.055	pos	M+CH3OH+H				55.5				140302	0	0	0
1.16_182.0580n	3,4-Dimethoxybenzoic acid	C9H10O4	1.15703	165.055	pos	M+ACN+H, M+H-H2O	7121	DAUAQNGYDSHRET-UHFFFAOYSA-N	COC1=C(C=C(C=C1)C(=O)O)OC	55.5	Benzenoids	Benzene and substituted derivatives	Benzoic acids and derivatives	94732.4	59922.7	0	57701.6
6.27_135.0806m/z	2,5-Dimethylbenzaldehyde	C9H10O	6.2662	135.081	pos	M+H	22015	SMUVABOERCFKRW-UHFFFAOYSA-N	CC1=CC(=C(C=C1)C)C=O	55.4	Benzenoids	Benzene and substituted derivatives	Benzoyl derivatives	7959.21	53360.5	5031.79	56478.1
4.36_366.2023m/z	Ala Ile Tyr	C18H27N3O5	4.36135	366.202	pos	M+H	5478845	BYXHQQCXAJARLQ-ZLUOBGJFSA-N	C[C@@H](C(=O)N[C@@H](C)C(=O)N[C@@H](C)C(=O)O)N	55.2	Organic acids and derivatives	Carboxylic acids and derivatives	Amino acids, peptides, and analogues	0	77731.7	0	32297.1
5.43_350.2073m/z	Phe Ala Leu	C18H27N3O4	5.43033	350.207	pos	M+H	145457126	BBDSZDHUCPSYAC-QEJZJMRPSA-N	C[C@@H](C(=O)N[C@@H](CC(C)C)C(=O)O)NC(=O)[C@H](CC1=CC=CC=C1)N	55.2	Organic acids and derivatives	Carboxylic acids and derivatives	Amino acids, peptides, and analogues	0	72676.1	0	40021.3
4.83_122.0604m/z	Benzamide	C7H7NO	4.83282	122.06	pos	M+H	2331	KXDAEFPNCMNJSK-UHFFFAOYSA-N	C1=CC=C(C=C1)C(=O)N	54.9	Benzenoids	Benzene and substituted derivatives	Benzoic acids and derivatives	11989.3	6892.28	10852.3	7531.01
7.17_247.0965m/z	6-[(E)-2-(4-hydroxyphenyl)ethenyl]-4-methoxy-5,6-dihydro-2H-pyran-2-one	C14H14O4	7.17392	247.096	pos	M+H				54.9				1.2168e+06	517.829	0	0
9.26_275.2005m/z	(10Z,14E,16E)-10,14,16-Octadecatrien-12-ynoic acid	C18H26O2	9.25663	275.201	pos	M+H	10731060	KDVOULUCGQGVQH-IUDSIRJBSA-N	C/C=C/C=C/C#C/C=C\CCCCCCCCC(=O)O	54.8	Lipids and lipid-like molecules	Fatty Acyls	Fatty acids and conjugates	6315.92	2498.81	75142	1873.11
7.06_219.0652m/z	3-(6-hydroxy-2,3,4-trimethoxyphenyl)prop-2-enoic acid	C12H14O6	7.05652	219.065	pos	M+H-2H2O				54.7				17657.7	648.812	1710.77	14526.7
4.79_192.0425n	Isoscopoletin	C10H8O4	4.78703	193.05	pos	M+H, M+NH4	69894	SYTYLPHCLSSCOJ-UHFFFAOYSA-N	COC1=C(C=C2C=CC(=O)OC2=C1)O	54.7	Phenylpropanoids and polyketides	Coumarins and derivatives	Hydroxycoumarins	54485.4	7307.45	8137.56	10350.5
10.80_316.2040n	Phytocassane E	C20H28O3	10.7952	317.211	pos	M+H-H2O, M+H	10519496	MMRGGLJWHXYKLZ-ALKYXNQTSA-N	C[C@@H]1[C@@H]2CC[C@@H]3[C@@]([C@H]2C(=O)C=C1C=C)([C@@H](CC(=O)C3(C)C)O)C	54.6	Lipids and lipid-like molecules	Prenol lipids	Diterpenoids	20633.7	694.158	1636.65	339.946
10.35_271.2055m/z	11-Hydroxyandrosterone	C19H30O3	10.3501	271.206	pos	M+H-2H2O	21139727	PIXFHVWJOVNKQK-CJWOFWMHSA-N	C[C@]12CC[C@H](C[C@@H]1CC[C@@H]3[C@@H]2[C@@H](C[C@]4([C@H]3CCC4=O)C)O)O	54.6	Lipids and lipid-like molecules	Steroids and steroid derivatives	Androstane steroids	378.752	0	65730.9	0
4.58_771.2485m/z	Ferricrocin	C28H44FeN9O13	4.58467	771.249	pos	M+H				54.6				0	92702.6	0	74929.4
7.08_193.0498m/z	4-Methyl-6,7-dihydroxycoumarin	C10H8O4	7.08058	193.05	pos	M+H	5319502	KVOJTUXGYQVLAJ-UHFFFAOYSA-N	CC1=CC(=O)OC2=CC(=C(C=C12)O)O	54.5	Phenylpropanoids and polyketides	Coumarins and derivatives	Hydroxycoumarins	9920.82	7394.97	10617.4	40542.9
5.77_219.1017m/z	Eupatoriochromene	C13H14O3	5.7739	219.102	pos	M+H	100768	SVUVYHFYZBCYRF-UHFFFAOYSA-N	CC(=O)C1=C(C=C2C(=C1)C=CC(O2)(C)C)O	54.4	Organoheterocyclic compounds	Benzopyrans	1-benzopyrans	0	0	19408.8	0
9.00_313.0706m/z	3',4'-Di-O-methylquercetin	C17H14O7	8.99815	313.071	pos	M+H-H2O	5280681	WEPBGSIAWZTEJR-UHFFFAOYSA-N	COC1=C(OC2=CC(=CC(=C2C1=O)O)O)C3=CC(=C(C=C3)O)O	54.4	Phenylpropanoids and polyketides	Flavonoids	O-methylated flavonoids	11398.4	2088.09	12672.6	2426.1
7.80_415.1386m/z	3,5-dihydroxy-2-(4-hydroxy-3-methoxyphenyl)-8,8-dimethyl-4H,8H-pyrano[2,3-f]chromen-4-one	C21H18O7	7.79892	415.139	pos	M+CH3OH+H				54.4				16592.6	0	0	0
7.56_189.0911m/z	Diplosporin	C12H16O4	7.56165	189.091	pos	M+H-2H2O	129639	BFQQKLXDPGTJKC-HQJQHLMTSA-N	CC[C@@H]1CCC2=C([C@H]1O)C(=O)C(=CO2)CO	54.3	Organoheterocyclic compounds	Pyrans	Pyranones and derivatives	6763.13	3478.54	726.872	1786.58
7.03_309.0968m/z	5'-Deoxy-5-fluorocytidine	C9H12FN3O4	7.03363	309.097	pos	M+ACN+Na	10037499	YSNABXSEHNLERR-ZIYNGMLESA-N	C[C@@H]1[C@H]([C@H]([C@@H](O1)N2C=C(C(=NC2=O)N)F)O)O	54.1	Nucleosides, nucleotides, and analogues	5'-deoxyribonucleosides		67688.1	255.239	0	0
6.01_245.1384m/z	5-Hydroxyhexyl glucoside	C12H24O7	6.01427	245.138	pos	M+H-2H2O	12003173	TUWUCUHEEAQPQK-MQUIJDNUSA-N	CC(CCCCO[C@H]1[C@@H]([C@H]([C@@H]([C@H](O1)CO)O)O)O)O	54.1	Lipids and lipid-like molecules	Fatty Acyls	Fatty acyl glycosides	1636.62	33528.1	3991.35	4403.29
13.09_152.1203n	(R)-Camphor	C10H16O	13.0878	170.154	pos	M+H-H2O, M+NH4	159055	DSSYKIVIOFKYAU-XCBNKYQSSA-N	C[C@@]12CC[C@@H](C1(C)C)CC2=O	54.1	Lipids and lipid-like molecules	Prenol lipids	Monoterpenoids	11426.6	12992.5	6689.55	12349.1
0.63_189.1347m/z	Homo-L-arginine	C7H16N4O2	0.628467	189.135	pos	M+H	9085	QUOGESRFPZDMMT-YFKPBYRVSA-N	C(CCN=C(N)N)C[C@@H](C(=O)O)N	54	Organic acids and derivatives	Carboxylic acids and derivatives	Amino acids, peptides, and analogues	313783	0	0	0
5.18_175.0391m/z	7,8-Dihydroxy-4-methylcoumarin	C10H8O4	5.18195	175.039	pos	M+H-H2O	5355836	NWQBYMPNIJXFNQ-UHFFFAOYSA-N	CC1=CC(=O)OC2=C1C=CC(=C2O)O	54	Phenylpropanoids and polyketides	Coumarins and derivatives	Hydroxycoumarins	8634.32	0	0	0
7.13_351.1339m/z	Moschamindole	C20H18N2O4	7.1273	351.134	pos	M+H				53.8				0	0	33064.4	0
4.26_308.1604m/z	Ala Ala Phe	C15H21N3O4	4.25857	308.16	pos	M+H	11722740	PIPTUBPKYFRLCP-NHCYSSNCSA-N	C[C@@H](C(=O)N[C@@H](C)C(=O)N[C@@H](CC1=CC=CC=C1)C(=O)O)N	53.8	Organic acids and derivatives	Carboxylic acids and derivatives	Amino acids, peptides, and analogues	0	22480.7	0	713.44
7.05_321.1234m/z	4-(4-(3,4-dihydro-2H-benzo[b][1,4]dioxepin-7-yl)-5-methyl-1H-pyrazol-3-yl)benzene-1,3-diol	C19H18N2O4	7.04522	321.123	pos	M+H-H2O	133575476	XGOKFWVMCHHAJX-UHFFFAOYSA-N	CC1C(C(NN1)C2=C(C=C(C=C2)O)O)C3=CC4=C(C=C3)OCCCO4	53.7				2633.11	0	22894.3	0
3.85_286.1761m/z	Gly Pro Ile	C13H23N3O4	3.85405	286.176	pos	M+H	145456177	YNMQUIVKEFRCPH-QSFUFRPTSA-N	CC[C@H](C)[C@@H](C(=O)N[C@@H]([C@@H](C)CC)C(=O)NCC(=O)O)N	53.5	Organic acids and derivatives	Carboxylic acids and derivatives	Amino acids, peptides, and analogues	0	23807.2	0	78640
2.26_260.1373n	Glu Leu	C11H20N2O5	2.2575	261.145	pos	M+H-H2O, M+H	9856500	YBAFDPFAUTYYRW-YUMQZZPRSA-N	CC(C)C[C@@H](C(=O)O)NC(=O)[C@H](CCC(=O)O)N	53.3	Organic acids and derivatives	Carboxylic acids and derivatives	Amino acids, peptides, and analogues	441.688	46382.9	0	19722.4
11.42_211.1095m/z	(1R,2S,3S,4R)-p-Menthane-2,3-diol	C10H20O2	11.4199	211.11	pos	M+K				53.2				78729.3	89920.6	72041.9	95320.4
7.56_479.1703m/z	Agastenol	C27H26O8	7.56165	479.17	pos	M+H	10073783	NYOJCGUMMQIVQV-HPMYTTEASA-N	COC1=C(C=CC(=C1)/C=C\2/CO[C@H]([C@@H]2COC(=O)C3=CC=C(C=C3)O)C4=CC(=C(C=C4)O)OC)O	53.2	Benzenoids	Benzene and substituted derivatives	Benzoic acids and derivatives	49819.5	5584.78	0	0
10.84_303.2319m/z	ent-14,16-Epoxy-8-pimarene-3,15-diol	C20H32O3	10.835	303.232	pos	M+H-H2O	44606933	OJVSSCWLDLYDFI-WRPXMVFYSA-N	C[C@@]12CC[C@H](C([C@H]1CCC3=C2CC[C@]4([C@@H]3OC[C@@H]4O)C)(C)C)O	53	Lipids and lipid-like molecules	Steroids and steroid derivatives	Hydroxysteroids	26574	1410.07	35688.1	3211.05
7.05_251.0914m/z	Ikarisoside A	C26H28O10	7.04522	251.091	pos	M+2H	5481982	RPLMLWBOUPDPQF-GULSFEPBSA-N	C[C@H]1[C@@H]([C@H]([C@H]([C@@H](O1)OC2=C(OC3=C(C(=CC(=C3C2=O)O)O)CC=C(C)C)C4=CC=C(C=C4)O)O)O)O	52.8	Phenylpropanoids and polyketides	Flavonoids	Flavonoid glycosides	23125	1393.55	0	0
4.96_178.0864m/z	Metyrosine	C10H13NO3	4.96342	178.086	pos	M+H-H2O				52.8				14951.2	4097.38	5092.95	3231.64
1.14_495.1323m/z	2-O-Galloylsucrose	C19H26O15	1.1356	495.132	pos	M+H				52.4				0	565.588	0	187716
7.62_286.0841n	(-)-5,7-Dihydroxy-3-(4-hydroxybenzyl)-4-chromanone	C16H14O5	7.6206	319.118	pos	M+H, M+CH3OH+H	21627907	NXGGYXKVAVMQLL-UHFFFAOYSA-N	CC(=O)OC1=C(C=C(C2=C1OCC(C2=O)CC3=CC=C(C=C3)O)O)OC	52.3	Phenylpropanoids and polyketides	Homoisoflavonoids	Homoisoflavans	23937.2	0	0	0
0.68_273.0257m/z	dUMP	C9H13N2O8P	0.676517	273.026	pos	M+H-2H2O				52.2				3897.99	424.583	0	3980.14
5.77_213.1123m/z	Prenyl glucoside	C11H20O6	5.7739	213.112	pos	M+H-2H2O	14239303	GQJQCKUJCHMTNF-UHFFFAOYSA-N	CC(=CCOC1C(C(C(C(O1)CO)O)O)O)C	51.9	Lipids and lipid-like molecules	Fatty Acyls	Fatty acyl glycosides	6875.94	183.044	3925.83	277.243
14.71_456.3322m/z	Bufotenin	C13H19N2O+	14.7062	456.332	pos	2M+NH4	10257	VTTONGPRPXSUTJ-UHFFFAOYSA-N	CN(C)CCC1=CNC2=C1C=C(C=C2)O	51.8	Organoheterocyclic compounds	Indoles and derivatives	Tryptamines and derivatives	27224.9	0	0	0
7.77_329.1384m/z	8alpha-(2-Methylacryloyloxy)hirsutinolide	C19H24O7	7.7747	329.138	pos	M+H-2H2O	102064544	VSNXXZXCVFUXKD-LYUOXOCJSA-N	C[C@@H]1C[C@@H](C\2=C(C(=O)O/C2=C/[C@]3(CC[C@@]1(O3)O)C)CO)OC(=O)C(=C)C	51.8	Organoheterocyclic compounds	Dihydrofurans	Furanones	23941.5	0	0	0
0.79_349.0482m/z	Dracorhodin perchlorate	C17H15ClO7	0.792383	349.048	pos	M+H-H2O				51.7				0	75079.1	0	42346.9
11.39_315.1954m/z	Kahweol	C20H26O3	11.3947	315.195	pos	M+H	114778	JEKMKNDURXDJAD-HWUKTEKMSA-N	C[C@@]12C=CC3=C([C@H]1CC[C@]45[C@H]2CC[C@H](C4)[C@](C5)(CO)O)C=CO3	51.6	Organoheterocyclic compounds	Naphthofurans		22820	750.4	2936.59	1264.82
6.04_233.0809m/z	Salfredin B11	C13H12O4	6.0379	233.081	pos	M+H				51.5				10716	0	0	349.804
6.37_148.0757m/z	Indole-3-carbinol	C9H9NO	6.37012	148.076	pos	M+H	3712	IVYPNXXAYMYVSP-UHFFFAOYSA-N	C1=CC=C2C(=C1)C(=CN2)CO	51.3	Organoheterocyclic compounds	Indoles and derivatives	Indoles	2160.63	2517.7	6281.63	2487.28
6.00_420.1290m/z	Cis-zeatin-O-glucoside	C16H23N5O6	6.00308	420.129	pos	M+K				51.3				3465.78	0	63580.3	0
6.52_361.0917m/z	(2E)-3-(2,5-dihydroxyphenyl)prop-2-enoic acid	C9H8O4	6.52065	361.092	pos	2M+H				51.1				96477.4	0	0	0
12.30_278.1520n	dibutyl phthalate	C16H22O4	12.3016	279.159	pos	M+H, M+Na				51.1				593679	299248	233833	322673
4.90_352.1866m/z	Ser Val Phe	C17H25N3O5	4.89737	352.187	pos	M+H	145457938	HNDMFDBQXYZSRM-IHRRRGAJSA-N	CC(C)[C@@H](C(=O)N[C@@H](CC1=CC=CC=C1)C(=O)O)NC(=O)[C@H](CO)N	50.8	Organic acids and derivatives	Carboxylic acids and derivatives	Amino acids, peptides, and analogues	0	18458.3	0	3675.17
10.27_299.2007m/z	Benzaldehyden	C20H28O3	10.2733	299.201	pos	M+H-H2O	102004702	WFKAJHXRTWDPAT-ROPPNANJSA-N	CC(C)C1=C(C=C(C(=C1)C=O)[C@]2(CCCC(C2C=O)(C)C)C)O	50.7	Benzenoids	Benzene and substituted derivatives	Cyclohexylphenols	21384.1	1332.98	3069.59	462.46
14.48_670.4681m/z	PG(i-14:0/i-13:0)	C33H65O10P	14.48	670.468	pos	M+NH4	131823313	YIVVJPRANAPEED-IOWSJCHKSA-N	CC(C)CCCCCCCCCCC(=O)O[C@H](COC(=O)CCCCCCCCCC(C)C)COP(=O)(O)OC[C@H](CO)O	50.6	Lipids and lipid-like molecules	Glycerophospholipids	Glycerophosphoglycerols	668.249	92868.3	15592.8	0
1.23_132.1021m/z	Isoleucine	C6H13NO2	1.2329	132.102	pos	M+H	6306	AGPKZVBTJJNPAG-WHFBIAKZSA-N	CC[C@H](C)[C@@H](C(=O)O)N	50.6	Organic acids and derivatives	Carboxylic acids and derivatives	Amino acids, peptides, and analogues	398405	2.28921e+06	2942.44	2.31682e+06
8.69_211.1330m/z	7-Epijasmonic acid	C12H18O3	8.69318	211.133	pos	M+H	7251183	ZNJFBWYDHIGLCU-QKMQQOOLSA-N	CC/C=C\C[C@H]1[C@H](CCC1=O)CC(=O)O	50.5	Lipids and lipid-like molecules	Fatty Acyls	Lineolic acids and derivatives	1556.61	7436.83	840.697	22969.6
1.34_252.0729m/z	Clitocine	C9H13N5O6	1.33713	252.073	pos	M+H-2H2O	129111	OHEMBWZZEKCBAS-UUOKFMHZSA-N	C1=NC(=C(C(=N1)N[C@H]2[C@@H]([C@@H]([C@H](O2)CO)O)O)[N+](=O)[O-])N	50.3	Organic oxygen compounds	Organooxygen compounds	Carbohydrates and carbohydrate conjugates	30988.9	568.689	0	350.003
9.76_242.2114m/z	Drechslerine A	C14H24O2	9.76313	242.211	pos	M+NH4	10911204	WCRQEYCIOPEQST-RFGFWPKPSA-N	CC(C)[C@H]1CC[C@@]2([C@H]([C@H]1C=C2CO)CO)C	50.2	Organic oxygen compounds	Organooxygen compounds	Alcohols and polyols	8434.73	0	0	0
6.23_367.1652m/z	Dihydrochelerythrine	C21H19NO4	6.23188	367.165	pos	M+NH4				50.2				23671.5	336.957	0	0
5.16_207.1381m/z	Apocynol A	C13H20O3	5.1593	207.138	pos	M+H-H2O	11053300	NSPUEQDFCJBNBF-DMKSKQPMSA-N	C[C@H](/C=C/[C@H]1C(=CC(=O)CC1(C)C)CO)O	50.2	Lipids and lipid-like molecules	Prenol lipids	Sesquiterpenoids	1129.92	216.461	26127.2	182.533
9.36_242.1154n	Cycloepoxytriol A	C12H18O5	9.35817	207.102	pos	M+H-2H2O, M+Na	25227716	AESCGIUGTAAQDV-SZBONWBGSA-N	CCC[C@@H]1[C@@H](C2=C(CO1)[C@H]([C@H]3[C@@H]([C@H]2O)O3)O)O	50.1	Organoheterocyclic compounds	Pyrans		4751.8	804.142	22593.2	156.135
4.67_155.0947n	Heliotridine	C8H13NO2	4.67225	328.223	pos	M+Na, 2M+NH4	442736	HJSJELVDQOXCHO-JGVFFNPUSA-N	C1CN2CC=C([C@@H]2[C@H]1O)CO	50.1	Alkaloids and derivatives			6304.04	124719	5813.31	83540.1
